# Supplementary material for: Revisiting a (001)-oriented layered lead chloride templated by 1,2,4-triazolium: structural phase transitions, lattice dynamics and broadband photoluminescence
Source: Royal Society of Chemistry journal article supplement (doi:10.1039/d4dt00406j), 2024-01-01

Supporting information for

## **Revisiting a (001)-oriented Layered Lead Chloride Templated by 1,2,4-Triazolium: Structural Phase Transitions, Lattice Dynamics and Broadband Photoluminescence**

Mirosław Mączka,<sup>\*a</sup> Szymon Sobczak,<sup>b</sup> Maciej Ptak,<sup>a</sup> Szymon Smółka,<sup>a</sup> Katarzyna Fedoruk,<sup>c</sup>  
Filip Dybała,<sup>d</sup> Artur P. Herman,<sup>d</sup> Waldeci Paraguassu,<sup>e</sup> Jan K. Zaręba,<sup>f</sup> Robert Kudrawiec,<sup>d</sup>  
Adam Sieradzki,<sup>c</sup> Andrzej Katrusiak<sup>\*b</sup>

<sup>a</sup>*Institute of Low Temperature and Structure Research, Polish Academy of Sciences, ul. Okólna 2, 50-422 Wrocław, Poland*

<sup>b</sup>*Faculty of Chemistry, Adam Mickiewicz University, Uniwersytetu Poznańskiego 8, 61-614 Poznań, Poland*

<sup>c</sup>*Department of Experimental Physics, Wrocław University of Science and Technology, Wybrzeże Wyspiańskiego 27, 50-370, Wrocław, Poland*

<sup>d</sup>*Department of Semiconductor Materials Engineering, Faculty of Fundamental Problems of Technology, Wrocław University of Science and Technology, Wybrzeże Wyspiańskiego 27, 50-370 Wrocław, Poland*

<sup>e</sup>*Faculdade de Física, Universidade Federal do Pará, 66075-110 Belem, Brazil*

<sup>f</sup>*Institute of Advanced Materials, Wrocław University of Science and Technology, Wybrzeże Wyspiańskiego 27, 50-370, Wrocław, Poland*

e-mail: m.maczka@intibs.pl

**Table S1.** The definitions of local vibrational coordinates for 1,2,4-triazolium cation.

| Internal coordinate Label | Atom numbers | Assignment    | Bond (Angs.)/<br>Angle (Deg.) |
|---------------------------|--------------|---------------|-------------------------------|
| s1                        | 1 7          | $\nu$ NH      | 1.022242                      |
| s2                        | 2 8          | $\nu$ NH'     | 1.022652                      |
| s3                        | 4 6          | $\nu$ CH      | 1.087192                      |
| s4                        | 5 9          | $\nu$ CH'     | 1.087008                      |
| s5                        | 3 5          | $\nu$ NC      | 1.313869                      |
| s6                        | 2 4          | $\nu$ NC'     | 1.331561                      |
| s7                        | 1 4          | $\nu$ NC''    | 1.345646                      |
| s8                        | 3 2          | $\nu$ NN      | 1.359328                      |
| s9                        | 5 3 2        | $\delta$ CNN  | 103.91                        |
| s10                       | 7 1 5        | $\delta$ HNC  | 127.08                        |
| s11                       | 8 2 3        | $\delta$ HNN  | 119.34                        |
| s12                       | 6 4 2        | $\delta$ HCN  | 127.56                        |
| s13                       | 9 5 3        | $\delta$ HCN' | 125.05                        |
| s14                       | 1 4 2        | $\delta$ NCN  | 105.2                         |
| s15                       | 3 2 4        | $\delta$ NNC  | 112.97                        |
| s16                       | 7 1 5 3      | $\tau$ HNCN   | -180                          |
| s17                       | 8 2 3 5      | $\tau$ HNNC   | -180                          |
| s18                       | 6 4 2 3      | $\tau$ HCNN   | -180                          |
| s19                       | 9 5 3 2      | $\tau$ HCNN'  | -180                          |
| s20                       | 5 3 2 4      | $\tau$ CNN)   | 0                             |
| s21                       | 1 4 2 3      | $\tau$ NCN)   | 0                             |

**Table S2.** The crystallographic data for Tz<sub>2</sub>PbCl<sub>4</sub> (C<sub>4</sub>H<sub>6</sub>Cl<sub>4</sub>N<sub>6</sub>Pb) in phases I and II.

| Phase                                      |          | I                                                             | I                                                             | II                                                            | II                                                            |
|--------------------------------------------|----------|---------------------------------------------------------------|---------------------------------------------------------------|---------------------------------------------------------------|---------------------------------------------------------------|
| Temperature (K)                            |          | 390                                                           | 370                                                           | 360                                                           | 340                                                           |
| Formula weight                             |          | 489.15                                                        | 489.15                                                        | 489.15                                                        | 489.15                                                        |
| Wavelength (Å)                             |          | 0.71073                                                       | 0.71073                                                       | 0.71073                                                       | 0.71073                                                       |
| Crystal system                             |          | Orthorhombic                                                  | Orthorhombic                                                  | Orthorhombic                                                  | Orthorhombic                                                  |
| Space group                                |          | <i>Fmmm</i>                                                   | <i>Fmmm</i>                                                   | <i>Cmcm</i>                                                   | <i>Cmcm</i>                                                   |
| Unit cell dimensions (Å, °)                | <i>a</i> | 7.6009(7)                                                     | 7.5639(2)                                                     | 8.2929(2)                                                     | 8.2959(15)                                                    |
|                                            | <i>b</i> | 8.3017(6)                                                     | 8.2984(2)                                                     | 7.5535(2)                                                     | 7.4918(15)                                                    |
|                                            | <i>c</i> | 21.798(2)                                                     | 21.7768(7)                                                    | 21.7496(7)                                                    | 21.829(6)                                                     |
|                                            | $\beta$  | 90                                                            | 90                                                            | 90                                                            | 90                                                            |
| Volume (Å <sup>3</sup> )                   |          | 1375.4(2)                                                     | 1366.89(7)                                                    | 1362.40(7)                                                    | 1356.7(5)                                                     |
| <i>Z/Z'</i>                                |          | 4/1                                                           | 4/1                                                           | 4/1                                                           | 4/1                                                           |
| Calculated density (gcm <sup>-3</sup> )    |          | 2.362                                                         | 2.377                                                         | 2.385                                                         | 2.395                                                         |
| Absorption coefficient (mm <sup>-1</sup> ) |          | 13.029                                                        | 13.104                                                        | 13.148                                                        | 13.203                                                        |
| F(000)                                     |          | 896                                                           | 896                                                           | 896                                                           | 896                                                           |
| Crystal size (mm)                          |          | 0.616 × 0.26 × 0.14                                           | 0.62 × 0.26 × 0.14                                            | 0.616 × 0.26 × 0.14                                           | 0.56 × 0.18 × 0.12                                            |
| Θ-range for data collection (°)            |          | 7.478 to 58.026                                               | 7.486 to 58.018                                               | 7.494 to 58.146                                               | 7.328 to 57.778                                               |
| Min/max indices: <i>h, k, l</i>            |          | -10 ≤ <i>h</i> ≤ 10, -10 ≤ <i>k</i> ≤ 11, -28 ≤ <i>l</i> ≤ 29 | -10 ≤ <i>h</i> ≤ 10, -10 ≤ <i>k</i> ≤ 11, -28 ≤ <i>l</i> ≤ 29 | -10 ≤ <i>h</i> ≤ 10, -10 ≤ <i>k</i> ≤ 11, -28 ≤ <i>l</i> ≤ 29 | -11 ≤ <i>h</i> ≤ 10, -10 ≤ <i>k</i> ≤ 10, -29 ≤ <i>l</i> ≤ 27 |
| Reflect. Collected/unique                  |          | 6239/513                                                      | 5515/308                                                      | 11518/957                                                     | 7079/908                                                      |
| Rint/ Completeness (%)                     |          | 0.0767/96.7                                                   | 0.0655/92.3                                                   | 0.0598/92.5                                                   | 0.0511/94.9                                                   |
| Data/restrains/parameters                  |          | 513/15/30                                                     | 515/27/30                                                     | 957/0/43                                                      | 908/0/43                                                      |
| Goodness-of-fit on F2                      |          | 1.012                                                         | 1.071                                                         | 1.116                                                         | 1.192                                                         |
| Final R1/wR2 (I>2δ1)                       |          | 0.0258/0.0552                                                 | 0.0222/0.0486                                                 | 0.0233/0.0452                                                 | 0.0296/0.0631                                                 |
| R1/wR2 (all data)                          |          | 0.0260/0.0553                                                 | 0.0222/0.0486                                                 | 0.0369/0.0496                                                 | 0.0377/0.0687                                                 |

**Table S3.** The crystallographic data for  $Tz_2PbCl_4$  ( $C_4H_6Cl_4N_6Pb$ ) in phase III.

| Phase                                                                                      |          | III                                              | III                                              | III                                             |
|--------------------------------------------------------------------------------------------|----------|--------------------------------------------------|--------------------------------------------------|-------------------------------------------------|
| Temperature (K)                                                                            |          | 320                                              | 300                                              | 280                                             |
| Formula weight                                                                             |          | 489.15                                           | 489.15                                           | 489.15                                          |
| Wavelength (Å)                                                                             |          | 0.71073                                          | 0.71073                                          | 0.71073                                         |
| Crystal system                                                                             |          | Orthorhombic                                     | Orthorhombic                                     | Orthorhombic                                    |
| Space group                                                                                |          | <i>Pnma</i>                                      | <i>Pnma</i>                                      | <i>Pnma</i>                                     |
| Unit cell dimensions<br>(Å,°)                                                              | <i>a</i> | 7.5195(2)                                        | 7.4929(3)                                        | 7.4798(4)                                       |
|                                                                                            | <i>b</i> | 21.5921(7)                                       | 21.5667(10)                                      | 21.5667(13)                                     |
|                                                                                            | <i>c</i> | 8.3020(2)                                        | 8.3106(4)                                        | 8.3086(4)                                       |
|                                                                                            | $\beta$  | 90                                               | 90                                               | 90                                              |
| Volume (Å <sup>3</sup> )                                                                   |          | 1347.93(7)                                       | 1342.97(10)                                      | 1340.30(13)                                     |
| <i>Z/Z'</i>                                                                                |          | 4/1                                              | 4/1                                              | 4/1                                             |
| Calculated density (gcm <sup>-3</sup> )                                                    |          | 2.41                                             | 2.419                                            | 2.424                                           |
| Absorption coefficient (mm <sup>-1</sup> )                                                 |          | 13.289                                           | 13.338                                           | 13.364                                          |
| F(000)                                                                                     |          | 896                                              | 896                                              | 896                                             |
| Crystal size (mm)                                                                          |          | 0.616 × 0.261<br>× 0.144                         | 0.555 × 0.15 ×<br>0.123                          | 0.56 × 0.18 ×<br>0.12                           |
| Θ-range for data collection (°)                                                            |          | 7.314 to 58.32                                   | 7.322 to<br>57.906                               | 5.254 to 57.94                                  |
| Min/max indices: h, k, l                                                                   |          | -10 ≤ h ≤ 10, -<br>28 ≤ k ≤ 29, -<br>11 ≤ l ≤ 10 | -10 ≤ h ≤ 10, -<br>27 ≤ k ≤ 28, -<br>11 ≤ l ≤ 10 | -9 ≤ h ≤ 10, -<br>28 ≤ k ≤ 27, -<br>10 ≤ l ≤ 11 |
| Reflect. Collected/unique                                                                  |          | 22255/1768                                       | 13880/1675                                       | 13755/1662                                      |
| <i>R</i> <sub>int</sub> / Completeness (%)                                                 |          | 0.0615/97.8                                      | 0.0465/97.4                                      | 0.0396/95.8                                     |
| Data/restraints/parameters                                                                 |          | 1768/0/78                                        | 1675/0/78                                        | 1662/0/78                                       |
| Goodness-of-fit on F <sup>2</sup>                                                          |          | 1.116                                            | 1.106                                            | 1.132                                           |
| Final <i>R</i> <sub>1</sub> / <i>wR</i> <sub>2</sub> ( <i>I</i> > 2σ <sub><i>I</i></sub> ) |          | 0.0266/0.0460                                    | 0.0275/0.0618                                    | 0.0325/0.0546                                   |
| <i>R</i> <sub>1</sub> / <i>wR</i> <sup>2</sup> (all data)                                  |          | 0.0496/0.0512                                    | 0.0382/0.0668                                    | 0.0325/0.0575                                   |

**Table S4.** The crystallographic data for  $Tz_2PbCl_4$  ( $C_4H_6Cl_4N_6Pb$ ) in phase IV.

| Phase                                      | IV                 | IV                 | IV                    | IV                 | IV                 | IV                    | IV                 |           |
|--------------------------------------------|--------------------|--------------------|-----------------------|--------------------|--------------------|-----------------------|--------------------|-----------|
| Temperature (K)                            | 250                | 220                | 200                   | 180                | 150                | 130                   | 100                |           |
| Formula weight                             | 487.14             | 487.14             | 487.14                | 487.14             | 487.14             | 487.14                | 487.14             |           |
| Wavelength (Å)                             | 0.71073            | 0.71073            | 0.71073               | 0.71073            | 0.71073            | 0.71073               | 0.71073            |           |
| Crystal system                             | Monoclinic         | Monoclinic         | Monoclinic            | Monoclinic         | Monoclinic         | Monoclinic            | Monoclinic         |           |
| Space group                                | $P2_1/c$           | $P2_1/c$           | $P2_1/c$              | $P2_1/c$           | $P2_1/c$           | $P2_1/c$              | $P2_1/c$           |           |
| Unit cell dimensions (Å, °)                | a                  | 21.4566(15)        | 21.4831(12)           | 21.4212(18)        | 21.4424(18)        | 21.423(2)             | 21.429(2)          | 21.419(2) |
|                                            | b                  | 8.3029(3)          | 8.3057(3)             | 8.2997(3)          | 8.2994(3)          | 8.3075(4)             | 8.3075(4)          | 8.3049(4) |
|                                            | c                  | 7.4446(3)          | 7.4695(3)             | 7.4042(3)          | 7.4252(4)          | 7.3587(4)             | 7.3768(4)          | 7.3363(4) |
|                                            | $\beta$            | 90.036(4)          | 90.036(4)             | 90.020(5)          | 90.093(5)          | 90.112(6)             | 90.111(6)          | 90.149(6) |
| Volume (Å <sup>3</sup> )                   | 1332.80(10)        | 1326.27(12)        | 1321.38(14)           | 1316.39(13)        | 1313.21(17)        | 1309.63(16)           | 1305.01(16)        |           |
| $Z/Z'$                                     | 4/1                | 4/1                | 4/1                   | 4/1                | 4/1                | 4/1                   | 4/1                |           |
| Calculated density (gcm <sup>-3</sup> )    | 2.438              | 2.45               | 2.459                 | 2.468              | 2.474              | 2.481                 | 2.49               |           |
| Absorption coefficient (mm <sup>-1</sup> ) | 13.44              | 13.506             | 13.556                | 13.607             | 13.64              | 13.677                | 13.726             |           |
| F(000)                                     | 896                | 896                | 896                   | 896                | 896                | 896                   | 896                |           |
| Crystal size (mm)                          | 0.56 × 0.18 × 0.12 | 0.56 × 0.18 × 0.12 | 0.555 × 0.179 × 0.122 | 0.56 × 0.18 × 0.12 | 0.56 × 0.18 × 0.12 | 0.555 × 0.179 × 0.122 | 0.56 × 0.18 × 0.12 |           |
| $\Theta$ -range for data collection (°)    | 5.258 to 58.06     | 5.26 to 58.108     | 5.264 to 57.84        | 5.264 to 57.944    | 5.264 to 57.84     | 5.26 to 58.028        | 5.26 to 57.604     |           |

|                                      |                                                             |                                                             |                                                             |                                                             |                                                            |                                                            |                                                            |
|--------------------------------------|-------------------------------------------------------------|-------------------------------------------------------------|-------------------------------------------------------------|-------------------------------------------------------------|------------------------------------------------------------|------------------------------------------------------------|------------------------------------------------------------|
| Min/max indices: h, k, l             | $-28 \leq h \leq 27, -11 \leq k \leq 10, -10 \leq l \leq 9$ | $-28 \leq h \leq 26, -11 \leq k \leq 10, -10 \leq l \leq 9$ | $-28 \leq h \leq 26, -11 \leq k \leq 10, -10 \leq l \leq 9$ | $-28 \leq h \leq 26, -11 \leq k \leq 10, -10 \leq l \leq 9$ | $-26 \leq h \leq 28, -11 \leq k \leq 10, -9 \leq l \leq 9$ | $-28 \leq h \leq 26, -11 \leq k \leq 10, -9 \leq l \leq 9$ | $-28 \leq h \leq 26, -11 \leq k \leq 10, -9 \leq l \leq 9$ |
| Reflect. Collected/unique            | 14644/3182                                                  | 14514/3158                                                  | 14455/3145                                                  | 14257/3117                                                  | 14206/3100                                                 | 14134/3091                                                 | 14033/3071                                                 |
| Rint/ Completeness (%)               | 0.0431/99.8                                                 | 0.0417/99.8                                                 | 0.0321/99.3                                                 | 0.0380/99.2                                                 | 0.0379/99.3                                                | 0.0376/99.2                                                | 0.0374/99.2                                                |
| Data/restraints/parameters           | 3182/0/138                                                  | 3158/0/78                                                   | 3145/2/146                                                  | 3117/0/138                                                  | 3100/0/138                                                 | 3091/0/138                                                 | 3071/10/138                                                |
| Goodness-of-fit on $F^2$             | 1.252                                                       | 1.2                                                         | 1.207                                                       | 1.209                                                       | 1.24                                                       | 1.279                                                      | 1.267                                                      |
| Final $R_1/wR_2$ ( $I > 2\delta_1$ ) | 0.354/0.0849                                                | 0.0419/0.0935                                               | 0.0442/0.0996                                               | 0.0492/0.1064                                               | 0.0549/0.1152                                              | 0.0583/0.1163                                              | 0.0628/0.1204                                              |
| $R_1/wR^2$ (all data)                | 0.0500/0.0906                                               | 0.0571/0.1007                                               | 0.0595/0.1069                                               | 0.0645/0.1150                                               | 0.0700/0.1245                                              | 0.0721/0.1241                                              | 0.0770/0.1286                                              |

**Table S5.** Selected hydrogen-bond parameters at various temperatures for phases I, II and III: hydrogen bond lengths (Å) and angles for normalized H-bond lengths (N-H = 1.015 Å). A and B indicates two symmetry independent Tz<sup>+</sup> cations.

| Temp.(K)         | D··A (Å)   | H··A (Å)   | D—H··A (°)    | D··A (Å)   | H··A (Å)   | D—H··A (°)    |
|------------------|------------|------------|---------------|------------|------------|---------------|
| <b>Phase I</b>   |            |            |               |            |            |               |
|                  | N1-Cl2     | H··Cl2     | N1-H··Cl2     |            |            |               |
| 390              | 3.151      | 2.113      | 165.00        |            |            |               |
| 370              | 3.141      | 2.303      | 164.54        |            |            |               |
| <b>Phase II</b>  |            |            |               |            |            |               |
|                  | N1-Cl2     | H··Cl2     | N1-H··Cl2     |            |            |               |
| 360              | 3.143      | 2.305      | 164.71        |            |            |               |
| 340              | 3.140      | 2.304      | 164.25(5)     |            |            |               |
| <b>Phase III</b> |            |            |               |            |            |               |
|                  | N2-Cl3     | H··Cl3     | N2-H··Cl3     | N1-Cl3     | H··Cl3     | N1-H··Cl3     |
| 320              | 3.163(5)   | 2.255(5)   | 148.17(3)     | 3.145(5)   | 2.132(5)   | 175.54(1)     |
| 300              | 3.172(5)   | 2.272(5)   | 146.96(4)     | 3.143(5)   | 2.129(5)   | 176.19(1)     |
| 280              | 3.169(4)   | 2.270(4)   | 146.95(5)     | 3.136(4)   | 2.124(4)   | 174.57(4)     |
| <b>Phase IV</b>  |            |            |               |            |            |               |
|                  | N2-Cl4/Cl3 | H··Cl4/Cl3 | N2-H··Cl4/Cl3 | N1-Cl4/Cl3 | H··Cl4/Cl3 | N1-H··Cl4/Cl3 |
| 250              | A 3.171(6) | 2.276(6)   | 146.46(6)     | 3.170(6)   | 2.275(6)   | 173.30(2)     |
|                  | B 3.140(6) | 2.129(6)   | 146.26(4)     | 3.144(6)   | 2.134(6)   | 174.27(3)     |
| 220              | A 3.171(6) | 2.276(6)   | 146.45(5)     | 3.144(6)   | 2.134(6)   | 173.30(2)     |
|                  | B 3.170(6) | 2.275(6)   | 146.26(4)     | 3.140(6)   | 2.129(6)   | 174.27(3)     |
| 200              | A 3.168(7) | 2.205(7)   | 157.75(5)     | 3.145(7)   | 2.135(7)   | 173.01(1)     |
|                  | B 3.132(7) | 2.122(7)   | 157.38(2)     | 3.176(7)   | 2.215(7)   | 173.04(4)     |
| 180              | A 3.176(8) | 2.286(8)   | 145.63(10)    | 3.135(8)   | 2.126(8)   | 172.62(2)     |
|                  | B 3.180(8) | 2.299(8)   | 144.50(1)     | 3.134(8)   | 2.124(8)   | 173.18(2)     |
| 150              | A 3.180(9) | 2.297(9)   | 144.63(3)     | 3.144(10)  | 2.137(10)  | 171.25(5)     |
|                  | B 3.183(9) | 2.298(9)   | 145.09(1)     | 3.135(9)   | 2.127(9)   | 171.80(1)     |
| 130              | A 3.185(5) | 2.303(5)   | 144.62(2)     | 3.143(3)   | 2.136(3)   | 171.23(3)     |
|                  | B 3.135(4) | 2.303(4)   | 144.75(5)     | 3.146(5)   | 2.134(5)   | 171.26(4)     |
| 100              | A 3.178(7) | 2.296(7)   | 144.57(3)     | 3.146(7)   | 2.141(7)   | 170.06(3)     |
|                  | B 3.180(8) | 2.297(8)   | 144.74(5)     | 3.140(8)   | 2.134(8)   | 170.36(4)     |

**Table S6.** List of Pb-Cl-Pb angles (°).

|     | Pb-Cl1-Pb | Pb-Cl2-Pb |
|-----|-----------|-----------|
| 390 | 180       | -         |
| 370 | 180       | -         |
| 360 | 179.7(1)  | -         |
| 340 | 179.85(1) | -         |
| 320 | 173.3(1)  | 159.89(1) |
| 300 | 172.76(1) | 157.86(1) |
| 280 | 172.29(2) | 155.95(1) |
| 250 | 172.01(6) | 154.33(7) |
| 220 | 171.63(7) | 152.47(9) |
| 200 | 171.37(8) | 151.24(9) |
| 180 | 171.1(1)  | 150.0(1)  |
| 150 | 170.9(1)  | 148.4(1)  |
| 130 | 170.8(1)  | 147.4(1)  |
| 100 | 170.7(1)  | 146.1(1)  |



**Table S7.** The bond length distortions of the individual PbCl<sub>6</sub> octahedra in phases I, II, III, and

IV at different temperatures.

| Phase I    |          |          |
|------------|----------|----------|
| Bonds (Å)  | 390 K    | 370 K    |
| Pb1-Cl1    | 2.814(1) | 2.807(1) |
| Pb1-Cl1'   | 2.814(1) | 2.807(1) |
| Pb1-Cl1''  | 2.814(1) | 2.807(1) |
| Pb1-Cl1''' | 2.814(1) | 2.807(1) |
| Pb1-Cl2    | 2.859(1) | 2.855(1) |
| Pb1-Cl2''  | 2.859(1) | 2.855(1) |
| d(Å)       | 2.8291   | 2.8231   |
| Δd         | 1.82910  | 1.82310  |

$i = 1-x, -y, z; ii = 1-x, y, -z; iii = x, -y, -z$

| Phase II   |          |          |
|------------|----------|----------|
| Bonds (Å)  | 360 K    | 340 K    |
| Pb1-Cl1    | 2.806(1) | 2.791(1) |
| Pb1-Cl1'   | 2.806(1) | 2.791(1) |
| Pb1-Cl1''  | 2.803(1) | 2.798(1) |
| Pb1-Cl1''' | 2.803(1) | 2.798(1) |
| Pb1-Cl2    | 2.857(1) | 2.868(1) |
| Pb1-Cl2'   | 2.857(1) | 2.868(1) |
| d(Å)       | 2.822    | 2.819    |
| Δd         | 0.000614 | 0.001209 |

$i = 1-x, y, 0.5-z; ii = -0.5+x, -0.5+y, z; iii = 1.5-x, -0.5+y, 0.5-z$

| Phase III |          |          |          |
|-----------|----------|----------|----------|
| Bonds (Å) | 320 K    | 300 K    | 280 K    |
| Pb1-Cl1   | 2.843(1) | 2.857(1) | 2.851(1) |
| Pb1-Cl1'  | 2.793(1) | 2.793(1) | 2.794(1) |
| Pb1-Cl2   | 2.853(1) | 2.857(1) | 2.859(1) |
| Pb1-C2''  | 2.809(1) | 2.809(1) | 2.813(1) |
| Pb1-Cl3   | 2.861(1) | 2.861(1) | 2.864(1) |
| Pb1-Cl3'' | 2.861(1) | 2.861(1) | 2.864(1) |
| d(Å)      | 2.8368   | 2.8398   | 2.8409   |
| Δd        | 1.83677  | 1.83977  | 1.84093  |

$i = x, 0.5-y, z; ii = -0.5+x, 0.5-y, 0.5-z$

| Phase IV              |          |          |          |          |          |          |          |
|-----------------------|----------|----------|----------|----------|----------|----------|----------|
| Bonds (Å)             | 250 K    | 220 K    | 200 K    | 180 K    | 150 K    | 130 K    | 100 K    |
| Pb1-Cl1               | 2.793(2) | 2.792(2) | 2.792(2) | 2.793(3) | 2.793(3) | 2.794(2) | 2.793(2) |
| Pb1-Cl2               | 2.863(2) | 2.867(2) | 2.869(2) | 2.871(2) | 2.873(2) | 2.873(2) | 2.875(2) |
| Pb1-Cl3               | 2.859(2) | 2.857(3) | 2.852(2) | 2.852(3) | 2.846(4) | 2.844(4) | 2.846(4) |
| Pb1-C1'               | 2.858(2) | 2.862(2) | 2.864(2) | 2.865(2) | 2.870(2) | 2.872(2) | 2.875(3) |
| Pb1-Cl2''             | 2.811(2) | 2.809(2) | 2.806(2) | 2.806(2) | 2.806(3) | 2.807(3) | 2.805(3) |
| Pb1-Cl4               | 2.857(2) | 2.854(3) | 2.851(2) | 2.846(2) | 2.846(4) | 2.848(4) | 2.844(4) |
| $d_{\text{mean}}$ (Å) | 2.8404   | 2.8404   | 2.8392   | 2.8391   | 2.8393   | 2.8400   | 2.8400   |
| Δd                    | 1.84037  | 1.84040  | 1.83920  | 1.83907  | 1.83930  | 1.83995  | 1.83997  |

$i = x, 0.5-y, 0.5-z; ii = x, 1.5-y, 0.5+z$

**Table S8.** Bond angle variance of the individual PbCl<sub>6</sub> octahedra in phase **I** at different temperature.

| Bond Angles (°)  | 390 K    | 370 K    |
|------------------|----------|----------|
| Cl1-Pb1-Cl2      | 90.00(1) | 90.00(1) |
| Cl1-Pb1-Cl1''    | 84.95(1) | 84.70(1) |
| Cl1-Pb1-Cl1'''   | 95.05(1) | 95.30(1) |
| Cl1-Pb1-Cl2''    | 90.00(1) | 90.00(1) |
| Cl1'-Pb1-Cl2     | 90.00(1) | 90.00(1) |
| Cl1'-Pb1-Cl1''   | 95.05(1) | 95.30(1) |
| Cl1'-Pb1-Cl2''   | 90.00(1) | 90.00(1) |
| Cl1'-Pb1-Cl1'''  | 84.95(1) | 84.70(1) |
| Cl1''-Pb1-Cl2    | 90.00(1) | 90.00(1) |
| Cl1'''-Pb1-Cl2   | 90.00(1) | 90.00(1) |
| Cl1'''-Pb1-Cl2'' | 90.00(1) | 90.00(1) |
| Cl1''-Pb1-Cl2''  | 90.00(1) | 90.00(1) |
| $\sigma$ (°)     | 3.0453   | 3.1960   |

*i = 1-x,-y,z; ii = 1-x,y,-z; iii = x,-y,-z*

**Table S9.** Bond angle variance of the individual PbCl<sub>6</sub> octahedra in phase **II** at different temperature.

| Bond Angles (°)    | 360 K    | 340 K    |
|--------------------|----------|----------|
| Cl1-Pb1-Cl2        | 89.91(1) | 90.02(1) |
| Cl1-Pb1-Cl1'       | 95.02(1) | 95.81(1) |
| Cl1-Pb1-Cl1'''     | 84.66(1) | 84.17(1) |
| Cl1-Pb1-Cl2'       | 89.91(1) | 90.02(1) |
| Cl1''-Pb1-Cl2      | 90.09(1) | 89.99(1) |
| Cl1''-Pb1-Cl1'     | 84.66(1) | 84.17(1) |
| Cl1''-Pb1-Cl2'     | 90.09(1) | 89.99(1) |
| Cl1''-Pb1-Cl1'''   | 95.66(1) | 95.85(1) |
| Cl1'-Pb1-Cl2       | 89.91(1) | 90.02(1) |
| Cl1'''-Pb1-Cl2     | 90.09(1) | 89.99(1) |
| Cl1'''-Pb1-Cl2'    | 90.09(1) | 89.99(1) |
| Cl1'-Pb1-Cl2'      | 89.91(1) | 90.02(1) |
| $\sigma(^{\circ})$ | 3.2239   | 3.5157   |

$i = 1-x,y,0.5-z$ ;  $ii = -0.5+x,-0.5+y,z$ ;  $iii = 1.5-x,-0.5+y,0.5-z$ ;

**Table S10.** Bond angle variance of the individual PbCl<sub>6</sub> octahedra in phase **III** at different temperature

| Bond Angles (°)    | 320 K     | 300 K     | 280 K     |
|--------------------|-----------|-----------|-----------|
| Cl1-Pb1-Cl2        | 102.32(1) | 103.30(1) | 104.12(1) |
| Cl1-Pb1-Cl3        | 90.74(1)  | 90.87(1)  | 91.06(1)  |
| Cl1-Pb1-Cl1''      | 83.80(1)  | 83.38(1)  | 83.13(1)  |
| Cl1-Pb1-Cl3'       | 90.74(1)  | 90.87(1)  | 91.06(1)  |
| Cl2''-Pb1-Cl2      | 84.97(1)  | 84.90(1)  | 84.98(1)  |
| Cl2''-Pb1-Cl3      | 89.23(1)  | 89.11(1)  | 88.92(1)  |
| Cl2''-Pb1-Cl3'     | 89.23(1)  | 89.11(1)  | 88.92(1)  |
| Cl2''-Pb1-Cl1      | 88.91(1)  | 88.42(1)  | 87.77(1)  |
| Cl2-Pb1-Cl3        | 90.13(1)  | 90.01(1)  | 89.95(1)  |
| Cl3'-Pb1-Cl2       | 90.13(1)  | 90.01(1)  | 89.95(1)  |
| Cl1''-Pb1-Cl3'     | 89.78(1)  | 89.88(1)  | 89.91(1)  |
| Cl1''-Pb1-Cl3      | 89.78(1)  | 89.88(1)  | 89.91(1)  |
| $\sigma(^{\circ})$ | 4.4632    | 4.7896    | 5.0574    |

$i = x,0.5-y,z$ ;  $ii = -0.5+x,0.5-y,0.5-z$

**Table S11.** Bond angle variance of the individual PbCl<sub>6</sub> octahedra in phase **IV** at different temperature.

| Bond Angles (°)    | 250 K     | 220 K     | 200 K     | 180 K     | 150 K     | 130 K     | 100 K     |
|--------------------|-----------|-----------|-----------|-----------|-----------|-----------|-----------|
| Cl1"-Pb1-Cl2       | 104.80(6) | 105.73(6) | 106.31(6) | 106.98(8) | 107.91(9) | 108.47(9) | 109.21(9) |
| Cl1"-Pb1-Cl3       | 91.02(6)  | 91.08(6)  | 91.09(6)  | 91.18(8)  | 91.15(9)  | 91.22(9)  | 91.6(1)   |
| Cl1"-Pb1-Cl1       | 82.89(5)  | 82.51(5)  | 82.23(6)  | 81.93(8)  | 81.45(9)  | 81.19(9)  | 80.84(9)  |
| Cl1"-Pb1-Cl4       | 91.15(6)  | 91.32(6)  | 91.33(6)  | 91.35(8)  | 91.44(9)  | 91.46(9)  | 91.6(1)   |
| Cl2"-Pb1-Cl1       | 87.17(6)  | 86.54(6)  | 86.18(6)  | 85.81(8)  | 85.35(9)  | 85.07(9)  | 84.60(9)  |
| Cl2"-Pb1-Cl2       | 85.14(6)  | 85.22(6)  | 85.29(7)  | 85.28(8)  | 85.29(9)  | 85.28(9)  | 85.35(9)  |
| Cl2"-Pb1-Cl3       | 89.04(6)  | 88.87(7)  | 88.97(7)  | 88.86(9)  | 88.9(1)   | 88.9(1)   | 89.0(1)   |
| Cl2"-Pb1-Cl4       | 88.84(6)  | 88.85(7)  | 88.80(7)  | 88.86(9)  | 88.9(1)   | 88.8(1)   | 88.8(1)   |
| Cl1-Pb1-Cl3        | 90.13(6)  | 90.26(6)  | 90.49(6)  | 90.56(9)  | 90.87(9)  | 91.00(9)  | 91.17(9)  |
| Cl1-Pb1-Cl4        | 90.19(6)  | 90.45(6)  | 90.53(6)  | 90.70(9)  | 90.81(9)  | 90.95(9)  | 91.15(9)  |
| Cl2-Pb1-Cl3        | 89.63(6)  | 89.52(7)  | 89.30(7)  | 89.18(9)  | 88.84(9)  | 88.90(1)  | 88.6(9)   |
| Cl2-Pb1-Cl4        | 89.76(6)  | 89.44(7)  | 89.35(7)  | 89.21(9)  | 89.12(9)  | 88.8(1)   | 88.8(1)   |
| $\sigma(^{\circ})$ | 5.2751    | 5.5973    | 5.8009    | 6.0387    | 6.3684    | 6.5745    | 6.8427    |

$i = x, 0.5-y, 0.5-z$ ;  $ii = x, 1.5-y, 0.5+z$

**Table S12.** The calculated ( $\omega_{\text{calc}}$ ) and scaled ( $\omega_{\text{SC}}$ ) wavenumbers together with PED for Tz<sup>+</sup>.

| $\omega_{\text{calc}}$ (cm <sup>-1</sup> ) | PED (%)                                                                                            |
|--------------------------------------------|----------------------------------------------------------------------------------------------------|
| 3512                                       | $\nu\text{NH}(57)+\nu\text{NH}'(42)$                                                               |
| 3503                                       | $\nu\text{NH}'(57)+\nu\text{NH}(42)$                                                               |
| 3213                                       | $\nu\text{CH}'(84)+\nu\text{CH}(15)$                                                               |
| 3207                                       | $\nu\text{CH}(84)+\nu\text{CH}'(15)$                                                               |
| 1552                                       | $\nu\text{NC}(33)+\nu\text{NC}''(20)+\delta\text{HNN}(17)+\delta\text{HNC}(15)$                    |
| 1507                                       | $\nu\text{NC}'(34)+\delta\text{HCN}(19)+\nu\text{NC}''(12)$                                        |
| 1400                                       | $\delta\text{HNC}(30)+\nu\text{NC}''(14)+\nu\text{NC}(12)+\delta\text{CNN}(12)$                    |
| 1391                                       | $\nu\text{NC}(33)+\delta\text{HNN}(31)+\delta\text{HCN}(10)$                                       |
| 1255                                       | $\delta\text{HCN}'(47)+\nu\text{NC}'(20)+\delta\text{HNN}(15)$                                     |
| 1166                                       | $\nu\text{NC}''(23)+\nu\text{NC}'(17)+\nu\text{NN}(12)+\delta\text{HNC}(13)+\delta\text{HCN}'(18)$ |
| 1152                                       | $\delta\text{HCN}(37)+\nu\text{NC}'(14)+\nu\text{NC}''(12)+\nu\text{NN}(12)$                       |
| 1083                                       | $\nu\text{NN}(40)+\delta\text{HNC}(24)+\delta\text{NCN}(11)$                                       |
| 1039                                       | $\delta\text{NNC}(26)+\delta\text{HCN}(22)+\nu\text{NN}(18)+\delta\text{CNN}(17)$                  |
| 948                                        | $\delta\text{NCN}(58)+\nu\text{NN}(14)$                                                            |
| 927                                        | $\delta\text{CNN}(45)+\delta\text{NNC}(35)$                                                        |
| 848                                        | $\tau\text{HCNN}'(64)+\tau\text{HCNN}(24)$                                                         |
| 827                                        | $\tau\text{HCNN}(56)+\tau\text{HCNN}'(28)$                                                         |
| 733                                        | $\tau\text{HNNC}(74)+\tau\text{HNCN}(18)$                                                          |
| 691                                        | $\tau\text{HNCN}(77)+\tau\text{HNNC}(20)$                                                          |
| 649                                        | $\tau\text{CNNC}(70)+\tau\text{NCNN}(19)$                                                          |
| 610                                        | $\tau\text{NCNN}(67)+\tau\text{CNNC}(19)+\tau\text{HCNN}(12)$                                      |

**Response to the comments of the crystallographic reviewer:**

There are 14 Structures in this paper. We examined this file: 2314654-2314667

This is a multi-temperature series of the same material.

The space group is reported to be

P21/c 100-250 K

Pnma 280-320 K

Cmcm 340-360 K

Fmmm 370-390 K

**\*\*triag2pbcl4\_iv\_100\_00\*\*** (CCDC 2314654)

The residuals are very large in this structure. Max|min = 1.9|-5.7. The R factors are high, and GooF is also higher than expected.

All ADPs are strongly elongated, mostly along the a-axis. Something isn't right here.

The structure is refined as a twin, but BASF refines to 9.7 -- which is meaningless and I really don't understand why it is here. It also makes no difference for the refinement.

Platon ADDSYMM thinks that these structures should be in Pnma. How precisely has the beta angle been measured? *\*Could\** this be 90 Degrees? It is by no means clear; a refinement in Pnma is slightly better than it is in P21/c, but still suffers from problems with elongated ADPs and large residuals.

When refining the structure with 'whole molecule' disorder, then much lower R factors will result (ok, there are more parameters, but still -- I am getting around 4.5%!).

The strange thing is that these issues are also present in all other P21/c structures -- but to a less and less extent.

There are a couple of other serious issue: It is not clear from the crystals size whether this was the same crystal or not, since the size is variously reported as 0.555 x 0.179 x 0.122 or as 0.56 x 0.18 x 0.12.

In any case, this crystal is **\*\*very much\*\*** too large to be suitable for this kind of experiment. The absorption coefficient  $\mu$  is  $13.7\text{mm}^{-1}$  -- so the largest size is definitely not supposed to be any bigger than 1/14 mm. This unsuitably large crystal may contribute to the observed high variation in the Fobs vs Fcalc plot.

Although there are fewer problems with the higher-T structures, these could also benefit from re-measuring data on a more suitably-sized crystal. This is all the more the case since there are also space-group ambivalences here.

In the MS, bond distances and angles are quoted without e.s.d values; please provide these values.

In the MS, please provide at least one structural drawing showing ADPs of each structure. From these images, any disorder should be visible -- and the nature of the actual molecule must be easily discernible.

In summary, I do not think that these structures provide any detailed information about phase changes at all: there is ambivalence in almost all structures with respect to the space groups. New structures, based on crystal of suitable size, might.

**Author response:**

*Thank you for your thorough review of our crystallographic data and for the insightful comments. We appreciate the opportunity to address the concerns you have raised.*

1. **Structure and Space Group Assignment:** *We acknowledge your observation regarding the assignment of space groups across different temperature ranges. The choice of monoclinic symmetry was a pivotal aspect of our study. This assignment was based on Differential Scanning Calorimetry (DSC) measurements, supported by Raman and Second Harmonic Generation (SGH) measurements and the details regarding the space group selection for phase IV was described in Discussion chapter of our article. In all our structural experiments, the beta angle was measured to three decimal places with esd not exceeding 0.006°. To further clarify this important issue, we have added the plot of the monoclinic strain as a function of temperature. The strain is weak, which explains the result of the PLATON report.*
2. **Residual density and ADPs:** *We understand your concerns about the large residuals and elongated ADPs, predominantly along the a-axis, as shown in the figures below (similar images and graphs could be obtained for P2<sub>1</sub>/c at other temperatures). These observations were intriguing to us as well and led to a deeper investigation into the underlying crystallography. The refinement as a twin and the inclusion of BASF was an attempt to account for the observed anomalies, albeit not providing a significant improvement in the refinement quality. We repeated the refinement without TWIN and resubmitted the CIFs. The residual density peaks indeed occur in our crystallographic data (see the figures below for the structure at 100K; similar images and graphs could be obtained for all P2<sub>1</sub>/c structures reported in this paper) however they are consistently located around the central Pb<sup>2+</sup> cations, which is typical for very heavy atoms.*

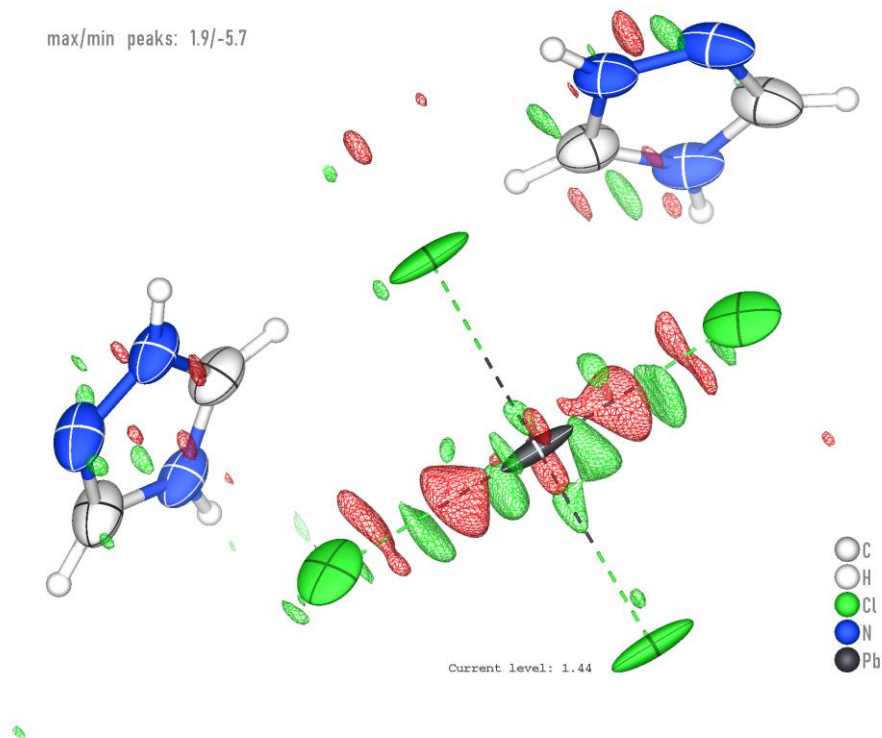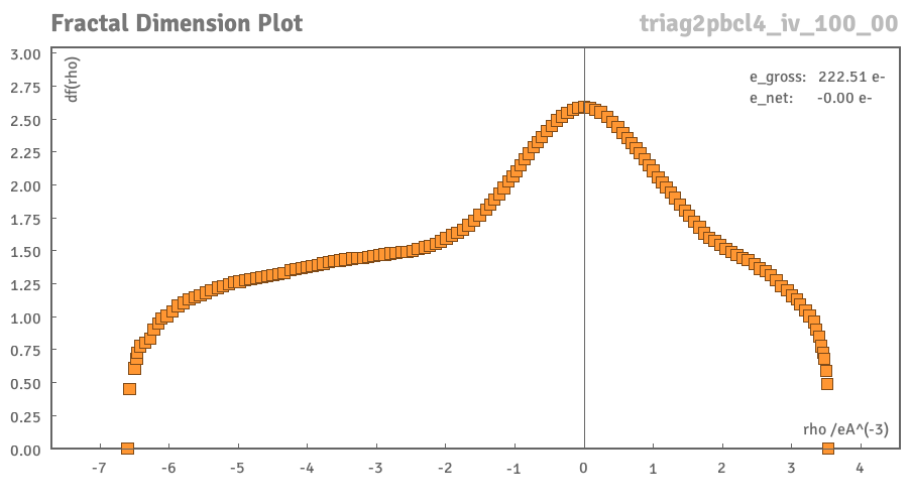

3. **Crystal Size and Suitability:** *We agree with your observation regarding the crystal size being larger than ideal for X-ray diffraction experiments. It's a valid point that large crystals can lead to high variation in the  $F_{obs}$  vs  $F_{calc}$  plot due to absorption issues. However, we encountered a challenge with our crystals growing large, and our experience suggests that cutting them could introduce defects that significantly hamper structural determination, especially for phase IV, which shows strong pseudosymmetry toward the orthorhombic system. To overcome this challenge, we designed an*



*experimental strategy employing a bisecting mode positioning of the sample to minimize absorption in the needle-like crystal aligned along the diffractometer phi axis. Indeed, this approach should have been explained in Experimental, which we have done in the revised manuscript. This approach was a compromise to balance crystal integrity and experimental feasibility.*

4. **Reporting of Bond Distances and Angles:** *We acknowledge the omission of e.s.d values for bond distances and angles in the manuscript (MS) and will ensure these are included in the revised manuscript.*
5. **Structural Drawings and Disorder Visibility:** *We appreciate your suggestion to include structural drawings showing ADPs for each structure. This addition will indeed help in visualizing any disorder and making the nature of the molecule more discernible. We will incorporate these drawings in the revised supporting information.*
6. **ESD values:** Thank you for pointing out the lacking e.s.d values for bond distances and angles in our article. We acknowledge this oversight and have now included these values in the revised manuscript and SI to provide a more complete and accurate representation of our findings.

In summary, we recognize the validity of your concerns and are committed to addressing them thoroughly in our revised manuscript. We believe that with the proposed amendments, our study will provide more robust and clear insights into the phase changes and structural characteristics of the material under investigation. Thank you once again for your constructive feedback.

We also include checkCif alerts at the end of SI

**Table S13.** Raman and IR wavenumbers (in  $\text{cm}^{-1}$ ) of  $\text{Tz}_2\text{PbCl}_4$  at various temperatures together with the proposed assignment.<sup>a</sup>

| RS<br>380 K | IR<br>370 K | RS<br>300 K      | IR<br>300 K | RS<br>80 K             | IR<br>10 K  | Pol. RS | Calc. | assignment           |
|-------------|-------------|------------------|-------------|------------------------|-------------|---------|-------|----------------------|
| 3230sh      | 3236m,vb    | 3213sh           | 3228m,vb    | 3210sh                 | 3218m       |         | 3512  | vN-H ip              |
|             |             | 3130w            |             | 3140w+3130w            |             |         |       | overtone/combination |
| 3097vw      |             | 3096w            |             | 3106w+3092w            |             |         |       | overtone/combination |
|             | 3072s       |                  | 3075s       |                        | 3097s+3081s |         | 3503  | vN-H icp             |
| 3155m       | 3166m       | 3153m            | 3167m       | 3154m                  | 3173m       | 3149m   | 3213  | vC-H ip              |
|             | 3120m       |                  | 3121m       |                        | 3121m       |         | 3207  | vC-H icp             |
| 3037w       | 3034w       | 3036w            | 3036w       | 3007w+2987w            |             | 3040w   |       | overtone/combination |
| 2936w       | 2924m       | 2935w+<br>2915sh | 2923w       | 2933w+2924w<br>+ 2900w | 2921w       | 2936w   |       | overtone/combination |
|             | 2900m       |                  | 2900w       |                        | 2896w       |         |       | overtone/combination |
| 2811w       | 2795w       | 2815w            | 2796w       | 2820w                  | 2794vw      | 2816w   |       | overtone/combination |
| 1561vw      | 1556s       | 1561vw           | 1554s       | 1562vw                 | 1551s       | 1562w   | 1552  | vC-N, $\delta$ N-H   |
| 1533vw      | 1527s       | 1534vw           | 1527s       |                        | 1529s+1521s | 1533m   | 1507  | vC-N, $\delta$ C-H   |
| 1417vw      | 1406m       | 1419w            | 1407m       | 1423w                  | 1410w+1404m | 1421w   | 1400  | $\delta$ N-H, vC-N   |
| 1393vw      | 1390m       | 1392w            | 1389s       | 1388w                  | 1395w+1384s | 1392s   | 1391  | vC-N, $\delta$ N-H   |
| 1317vw      |             | 1318vw           |             | 1319vw                 |             | 1318w   |       | overtone/combination |
| 1263s       | 1255w       | 1261s            | 1253w       | 1257s+1250m            | 1250w+1248w | 1262s   | 1255  | $\delta$ C-H         |
|             | 1236w       |                  | 1237w       |                        | 1240w+1235w | 1240vw  |       | overtone/combination |

|        |           |        |           |           |             |       |      |                             |
|--------|-----------|--------|-----------|-----------|-------------|-------|------|-----------------------------|
|        | 1175w     |        | 1174w     |           | 1173w       |       |      | overtone/combination        |
| 1175s  | 1163s     | 1173s  | 1162s     | 1170s     | 1157s       | 1173s | 1166 | vC-N, $\delta$ C-H          |
| 1156w  | 1147m     | 1154m  | 1147s     | 1153m     | 1145w       | 1155m | 1152 | $\delta$ C-H, vC-N          |
| 1112w  | 1100w     | 1111w  | 1099w     | 1110vw    | 1101w+1095w | 1112s | 1083 | vN-N                        |
| 1037m  | 1033s     | 1037m  | 1032s     | 1038m     | 1032s       | 1038m | 1039 | $\delta$ NNC, $\delta$ C-H  |
|        | 952sh     |        | 954w      |           | 953w        |       |      | overtone/combination        |
| 956m   | 947s      | 955m   | 947s      | 955s      | 947s        | 955s  | 948  | $\delta$ NCN                |
| 942vw  | 939sh     | 941w   | 939sh     | 940w      | 938w        | 942w  | 927  | $\delta$ CNN, $\delta$ NNC  |
|        |           |        | 889w      |           | 899w+894w   | 895w  |      | overtone/combination        |
|        | 866m      |        | 867m      | 856vw     | 868m+865sh  |       | 848  | $\gamma$ C-H ip             |
|        |           |        |           |           | 843w+835w   |       |      | overtone/combination        |
|        | 816sh     |        | 817sh     | 835w      | 822m+817m   |       | 827  | $\gamma$ C-H icp            |
|        | 782s,vb   |        | 783s,vb   | 791w      | 799s+789s   |       | 733  | $\gamma$ N-H ip             |
|        | 736sh     |        | 740m      |           | 741m+735sh  |       | 691  | $\gamma$ N-H icp            |
|        | 658s+655s |        | 658s+655s |           | 659s+655s   | 659w  | 649  | $\gamma_{\text{ring}}$ CNCN |
|        | 618s      |        | 619s      |           | 620s+618sh  | 623w  | 611  | $\gamma_{\text{ring}}$ CNCN |
| 497w,b |           | 493w,b |           | 491w,b    |             |       |      | T'                          |
|        |           | 201w   |           | 204w      |             |       |      | L+ T'+ Pb-Cl stretch        |
| 174sh  |           | 176w   |           | 188w+180w |             |       |      | L+ T'+ Pb-Cl stretch        |
| 124m   |           | 127m   |           | 139m      |             |       |      | L+ T'+ Pb-Cl stretch        |

|     |      |           |                       |
|-----|------|-----------|-----------------------|
|     | 116m | 135m      | L+ T'+ Pb-Cl stretch  |
|     |      | 120m+110w | L+ T'+ Pb-Cl stretch  |
|     | 80m  | 86w+80w   | L+ T'+ Pb-Cl stretch  |
|     |      | 73w+70w   | Pb-Cl bend            |
| 56s | 60s  | 66m+62s   | Pb-Cl bend            |
| 34s | 49m  | 50s       | Pb-Cl bend            |
| 20s | 26vs | 32s       | L(PbCl <sub>6</sub> ) |

<sup>a</sup> key: vs, very strong; s, strong; m, medium; w, weak; vw, very weak; sh, shoulder; b, broad; vb, very broad; v, stretching;  $\delta$ , in-plane bending;  $\gamma$ , out-of-plane bending; ip, in-phase; icp, in-counterphase; L, librational mode of organic cation; T', translational mode of organic cation.

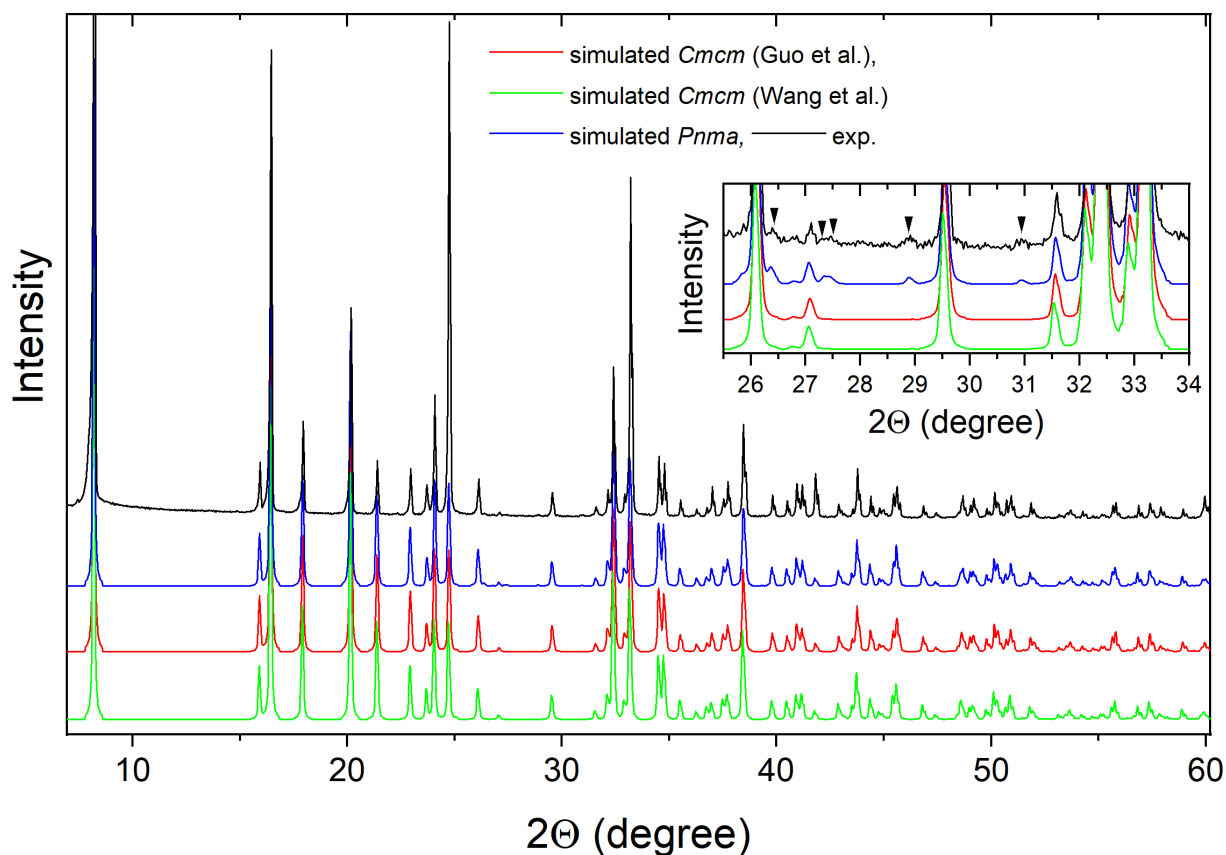

**Fig. S1.** Powder XRD pattern for  $\text{Tz}_2\text{PbCl}_4$  together with the calculated one based on the *Pnma* (300 K, this work), *Cmcm* (298 K, Guo *et al.*)<sup>1</sup> and *Cmcm* (300 K, Wang *et al.*)<sup>2</sup> single crystal structure of  $\text{Tz}_2\text{PbCl}_4$ . Inset shows details for weak reflections in the 25.5–34° range. Arrows indicate reflections which are consistent with the *Pnma* symmetry but do not appear in the simulated patterns based on the *Cmcm* symmetry.

## References

1. Y. Y. Guo, L. J. Yang, J. A. McNulty, A. M. Z. Slavin and P. Lightfoot, Structural Variations in (001)-oriented Layered Lead Halide Perovskites, Templated by 1,2,4-Triazolium, *Dalton Trans.*, 2020, **49**, 17274–17280.
2. Z. Wang, X. Chen, Y. Song, Z. Du, Y. Zhou, M. Li, W. Huang, Q. Xu, Y. Li, S. Zhao and J. Luo, A Two-Dimensional Hybrid Perovskite with Heat Switching Birefringences, *Angew. Chem. Int. Ed.*, 2023, **62**, e202311086.

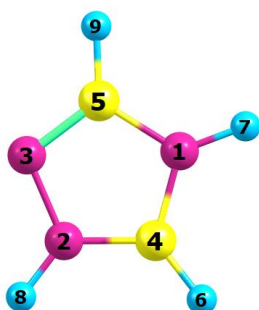

**Fig. S2.** Numbering of atoms in 1,2,4-triazol cation.

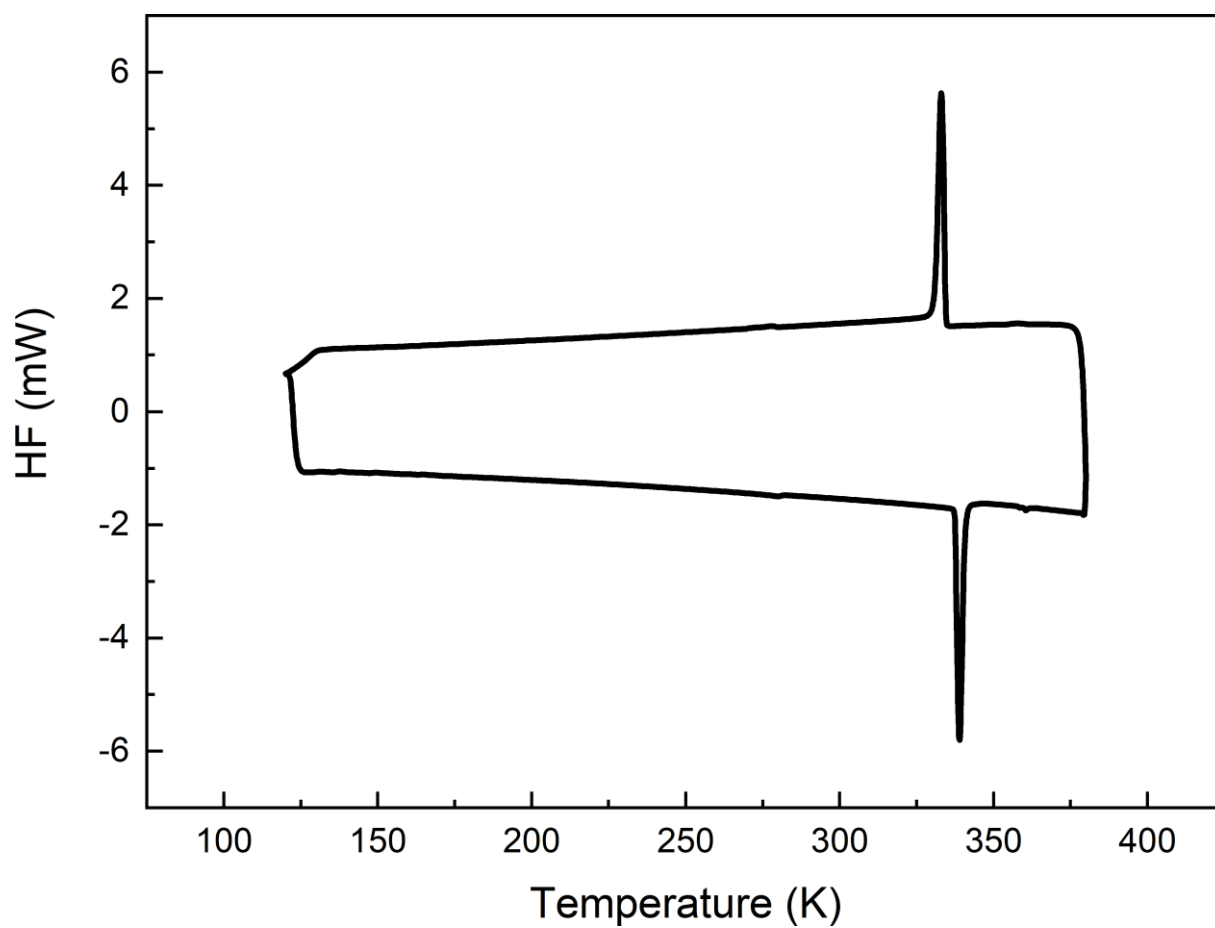

**Fig. S3.** DSC thermogram for  $Tz_2PbCl_4$  in heating and cooling mode.

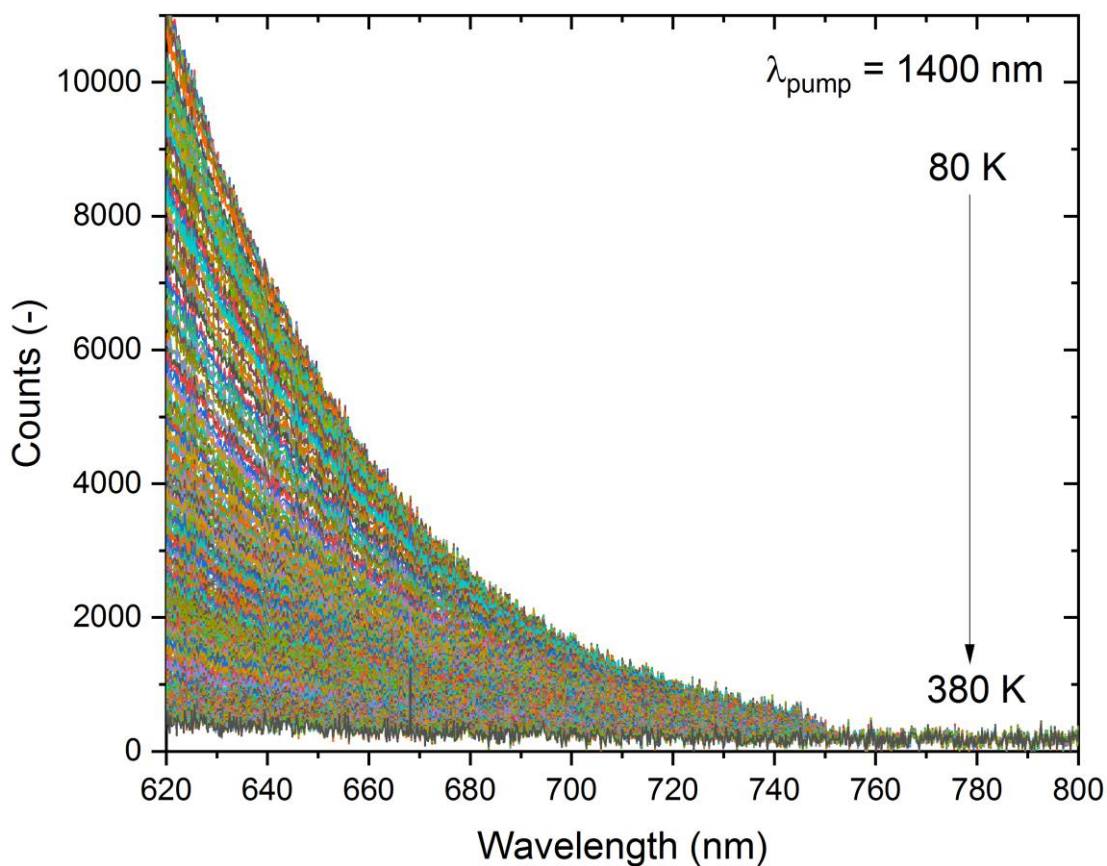

**Fig. S4.** Overlay of experimental spectra obtained upon irradiation of  $\text{Tz}_2\text{PbCl}_4$  with 1400 nm femtosecond laser pulses during heating run from 80K to 380K. The only nonlinear optical emission present in this spectrum is the long-wavelength tail of the multi-photon excited luminescence. The shoulder at around 750 nm is due to the short-pass optical filter centered at that wavelength. Note the lack of SHG response at  $\lambda/2$  (700 nm) confirms the structural centrosymmetry of  $\text{Tz}_2\text{PbCl}_4$  across all crystal phases.

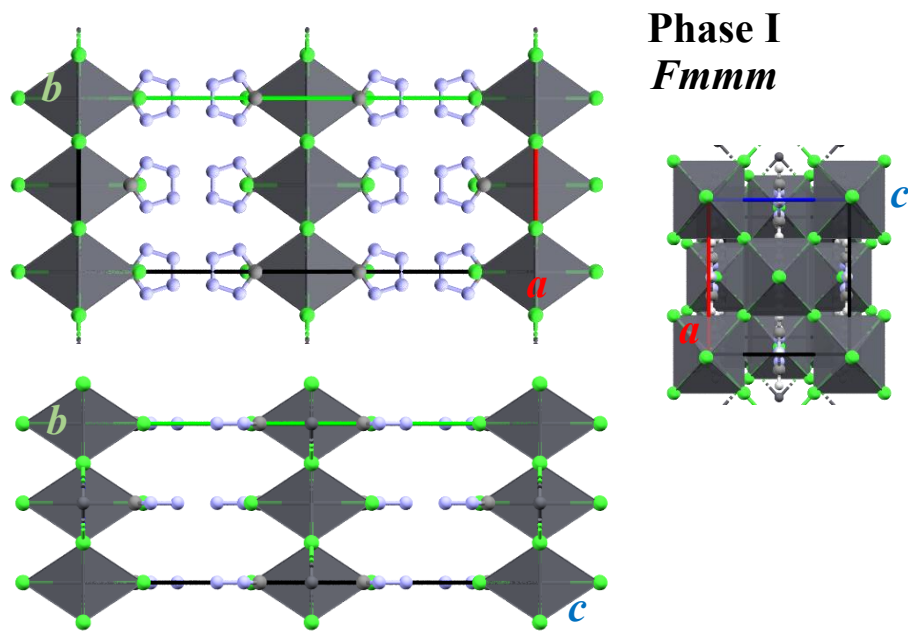

**Fig. S5.** Crystal structure of  $Tz_2PbCl_4$  phase I projected along all crystal directions.



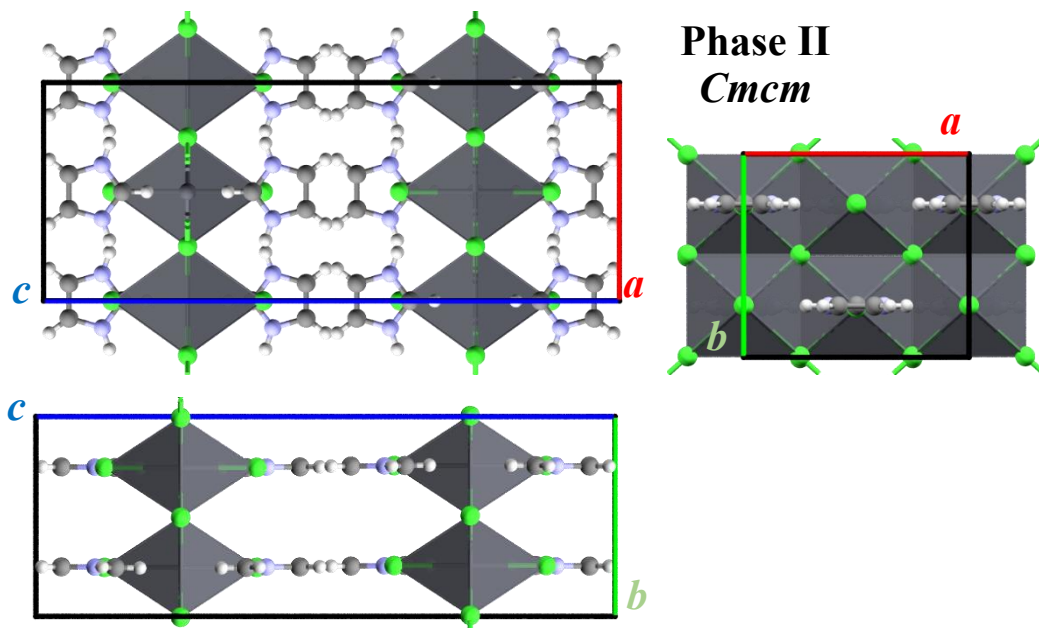

**Fig. S6.** Crystal structure of  $Tz_2PbCl_4$  phase II projected along all crystal directions.

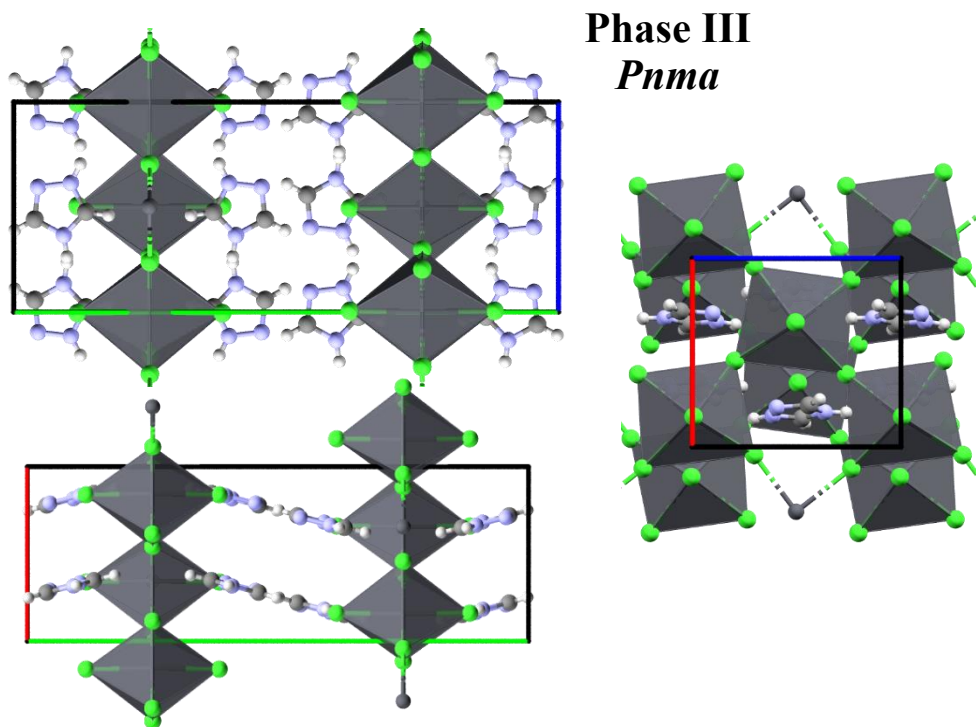

**Fig. S7.** Crystal structure of  $Tz_2PbCl_4$  phase III projected along all crystal directions.

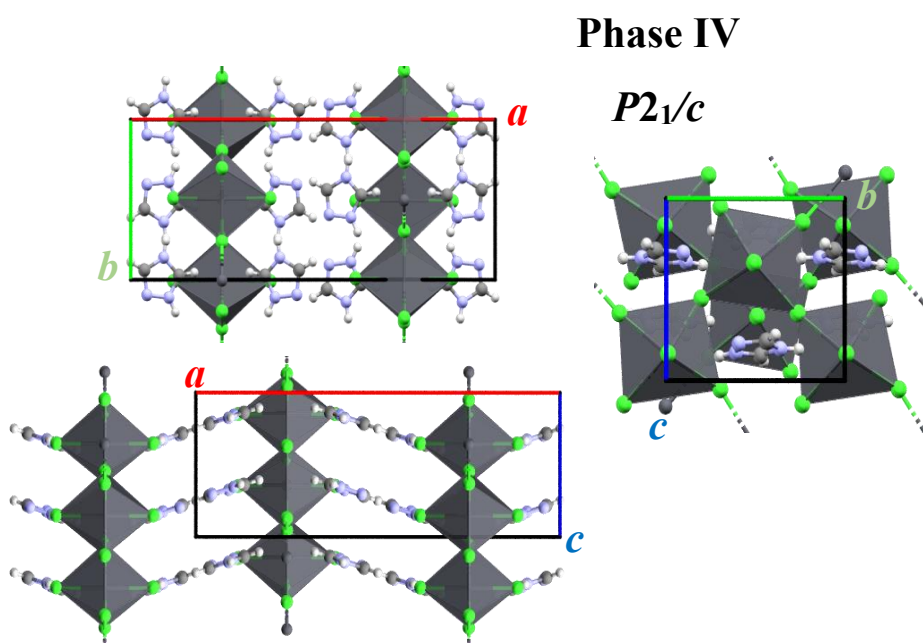

**Fig. S8.** Crystal structure of  $\text{Tz}_2\text{PbCl}_4$  phase IV projected along all crystal directions.

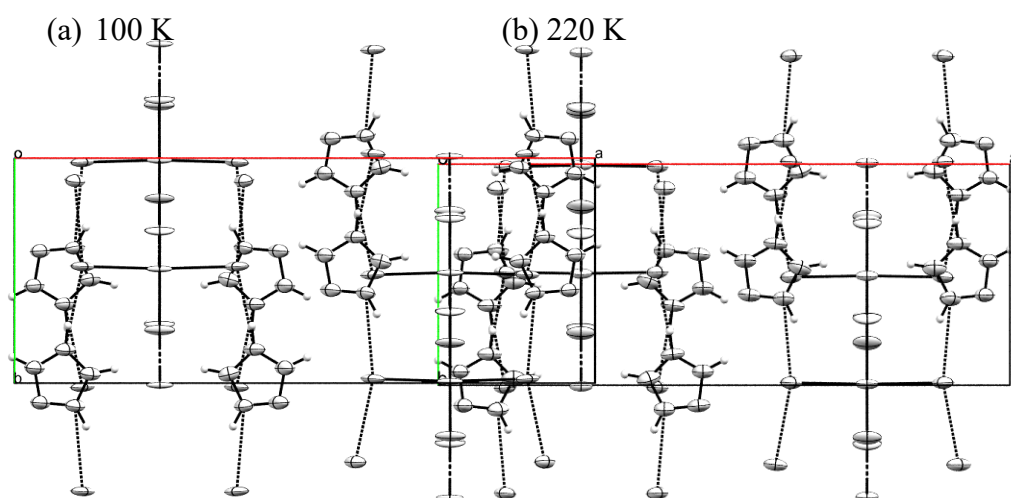

**Fig. S9.** The ORTEP diagram of  $\text{Tz}_2\text{PbCl}_4$  phase IV at (a) 100 K and (b) 220 K. Thermal ellipsoids are at 50% probability level. Dashed lines indicates the hydrogen bonds.

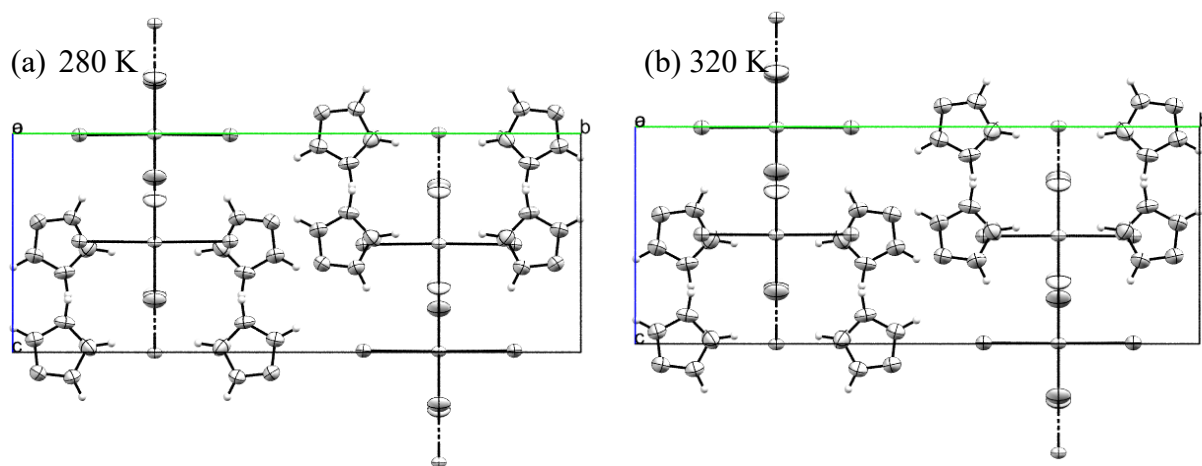

**Fig. S10.** The ORTEP diagram of  $Tz_2PbCl_4$  phase III at (a) 280 K and (b) 320 K. Thermal ellipsoids are at 50% probability level. Dashed lines indicates the hydrogen bonds.

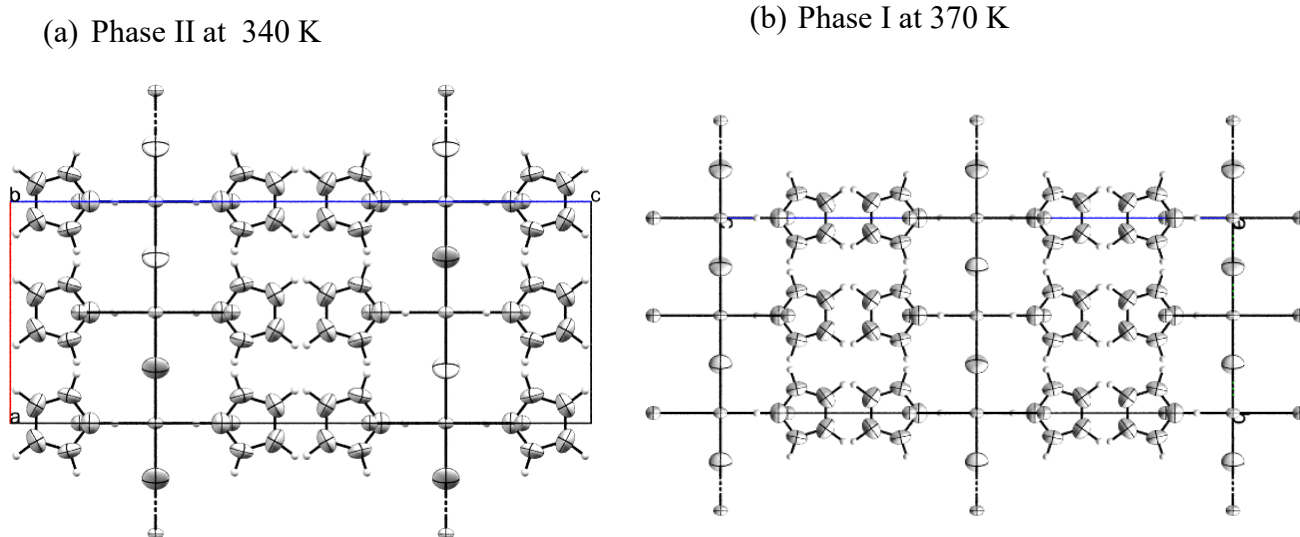

**Fig. S11.** The ORTEP diagram of  $Tz_2PbCl_4$  in (a) phase II at 340 K and (b) in phase I at 370 K. Thermal ellipsoids are at 50% probability level. Dashed lines indicates the hydrogen bonds.

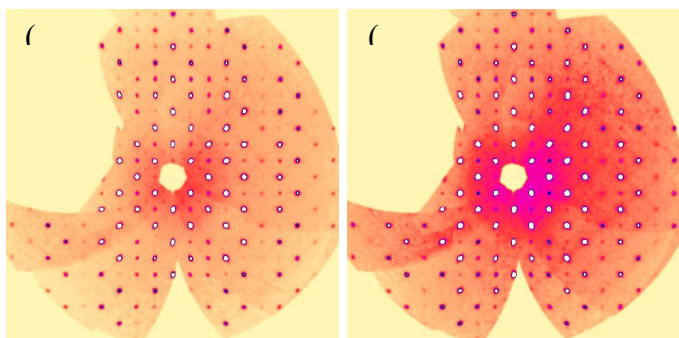

**Fig. S12.** The reconstructed  $hk0$  layer reconstructed from the measurements collected (a) at 280 K and (b) 300 K showing the presence of odd  $h+k$  reflections.

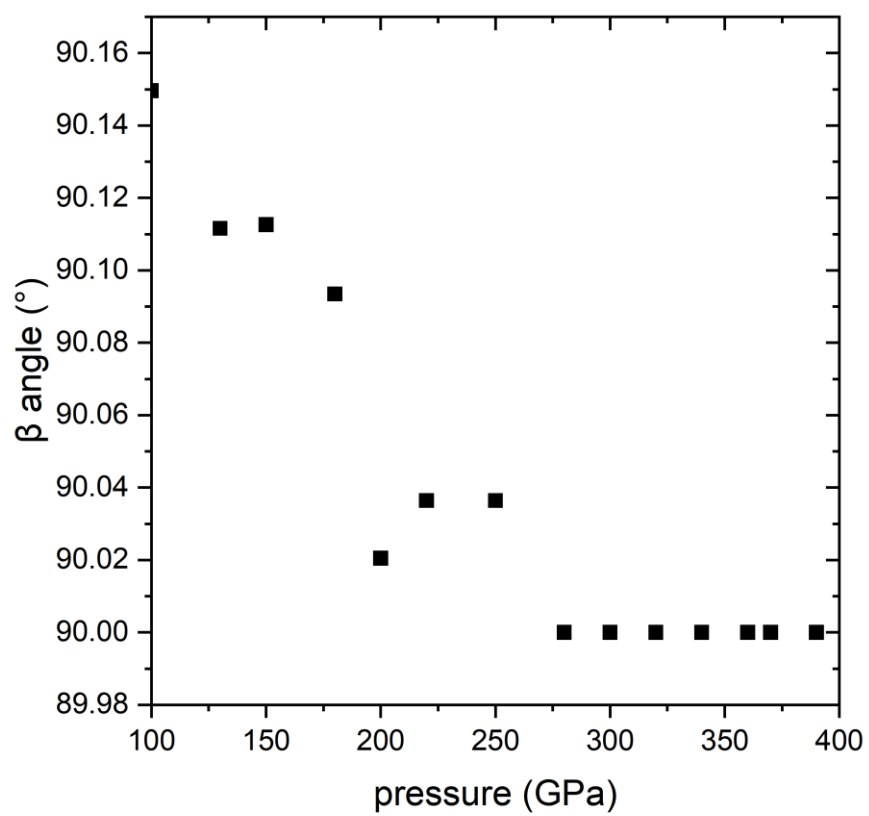

**Fig. S13.** The change of the  $\beta$  along plotted in the function of temperature. The ESD are smaller than symbols.

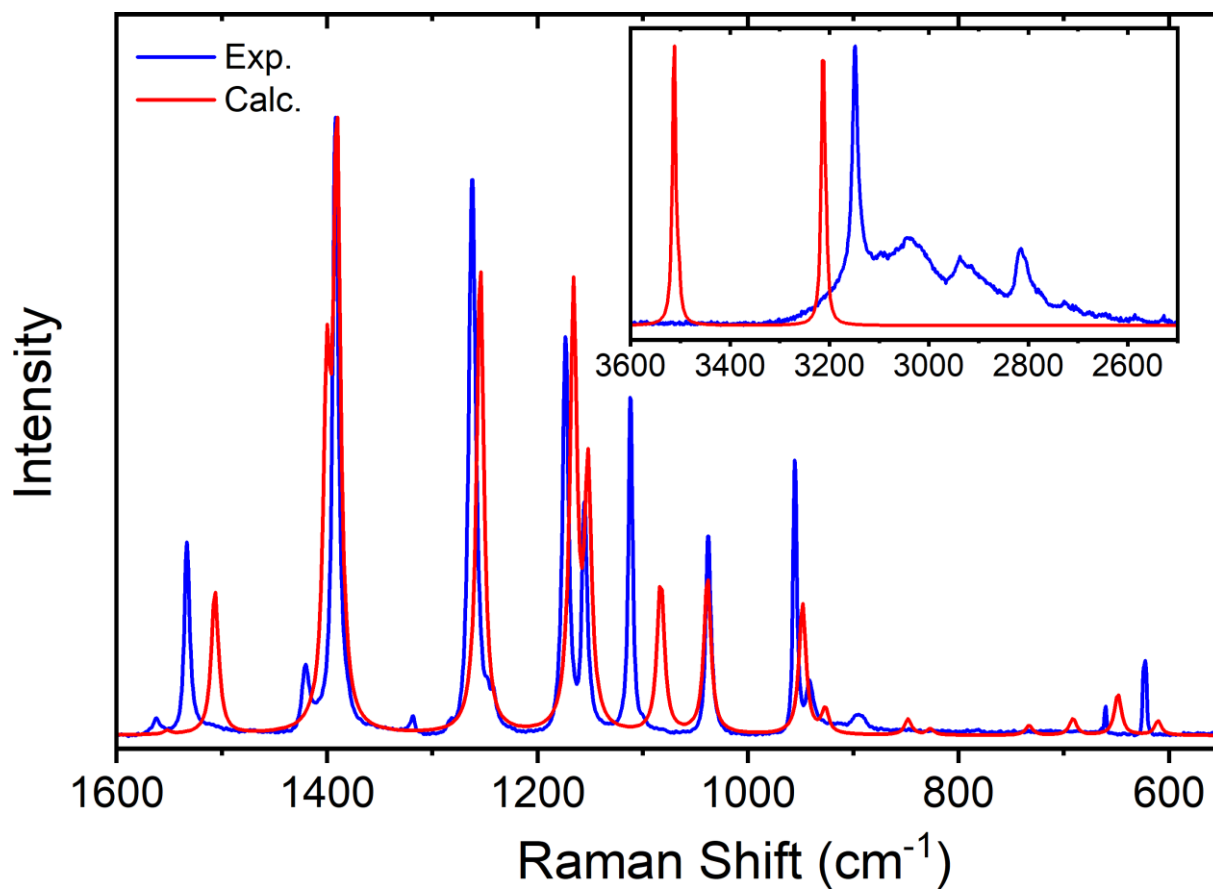

**Fig. S14.** Experimental Raman spectrum of polycrystalline  $\text{Tz}_2\text{PbCl}_4$  (blue) and calculated Raman spectrum of 1,2,4-triazolium cation (red).

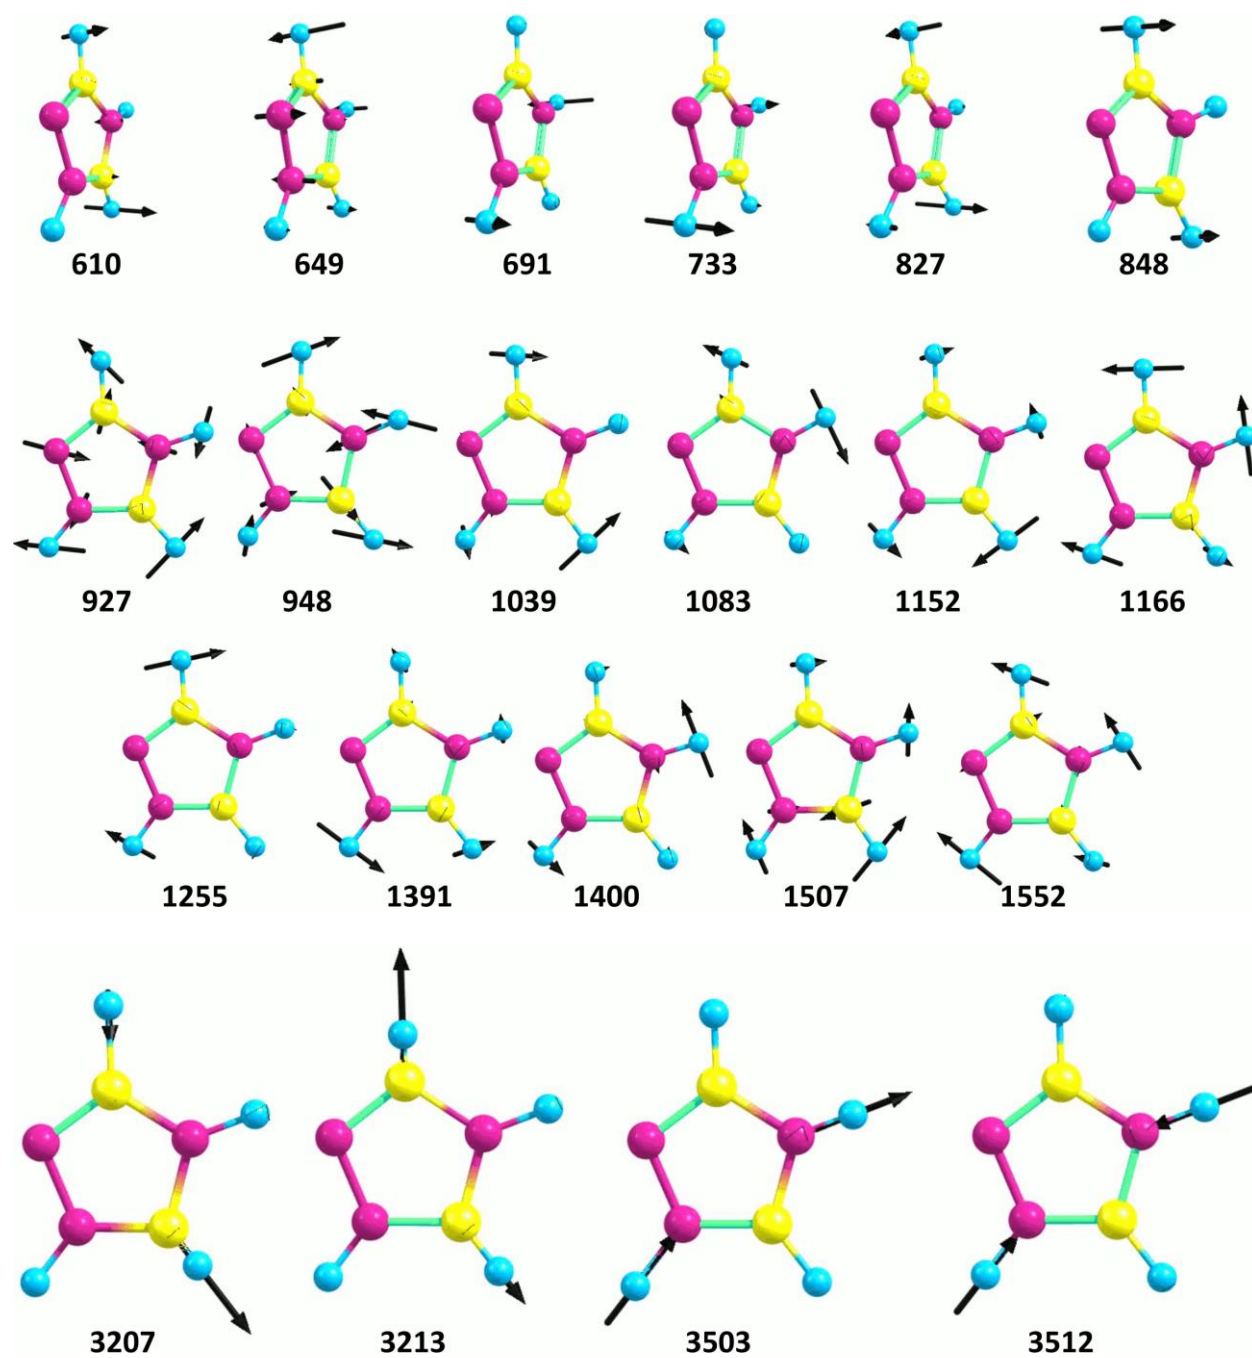

**Fig. S15.** Displacement of atoms for all calculated vibrational modes.



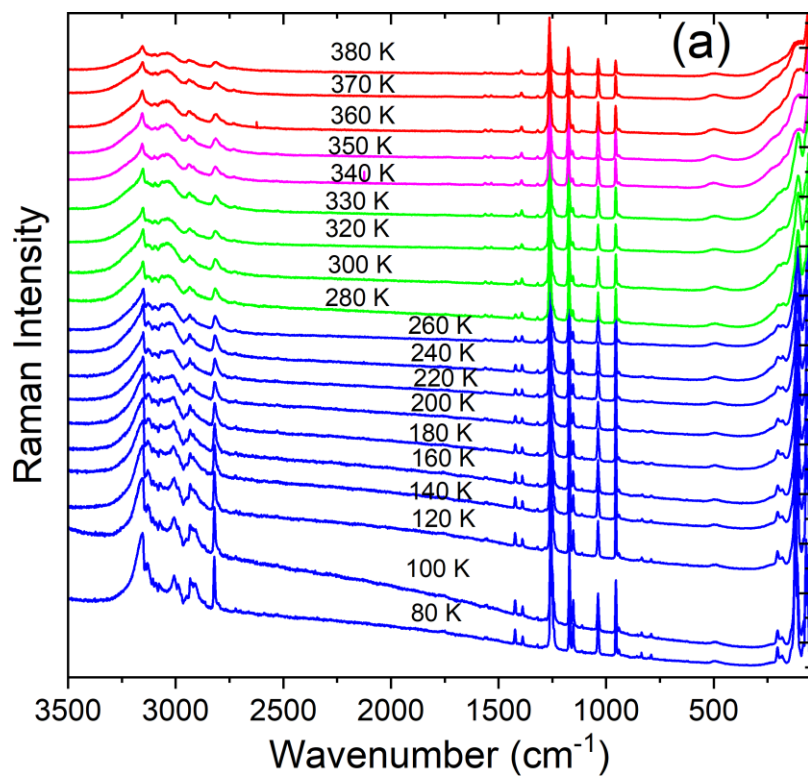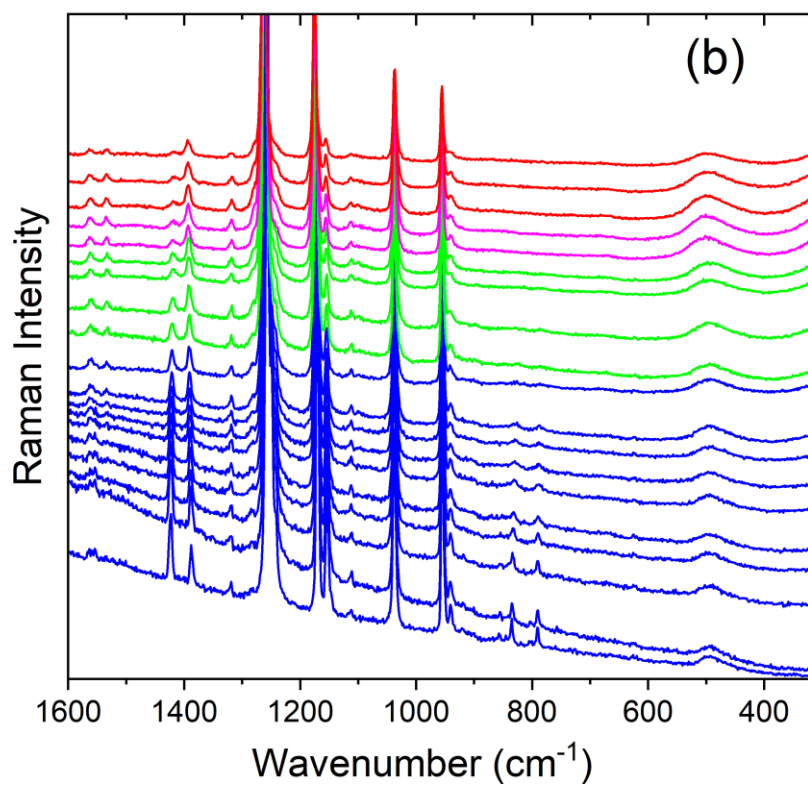

**Fig. S16.** (a) Temperature-dependent Raman spectra in the 3500-50  $\text{cm}^{-1}$  and (b) enlarged 1600-350  $\text{cm}^{-1}$  range to show details for weaker Raman bands.

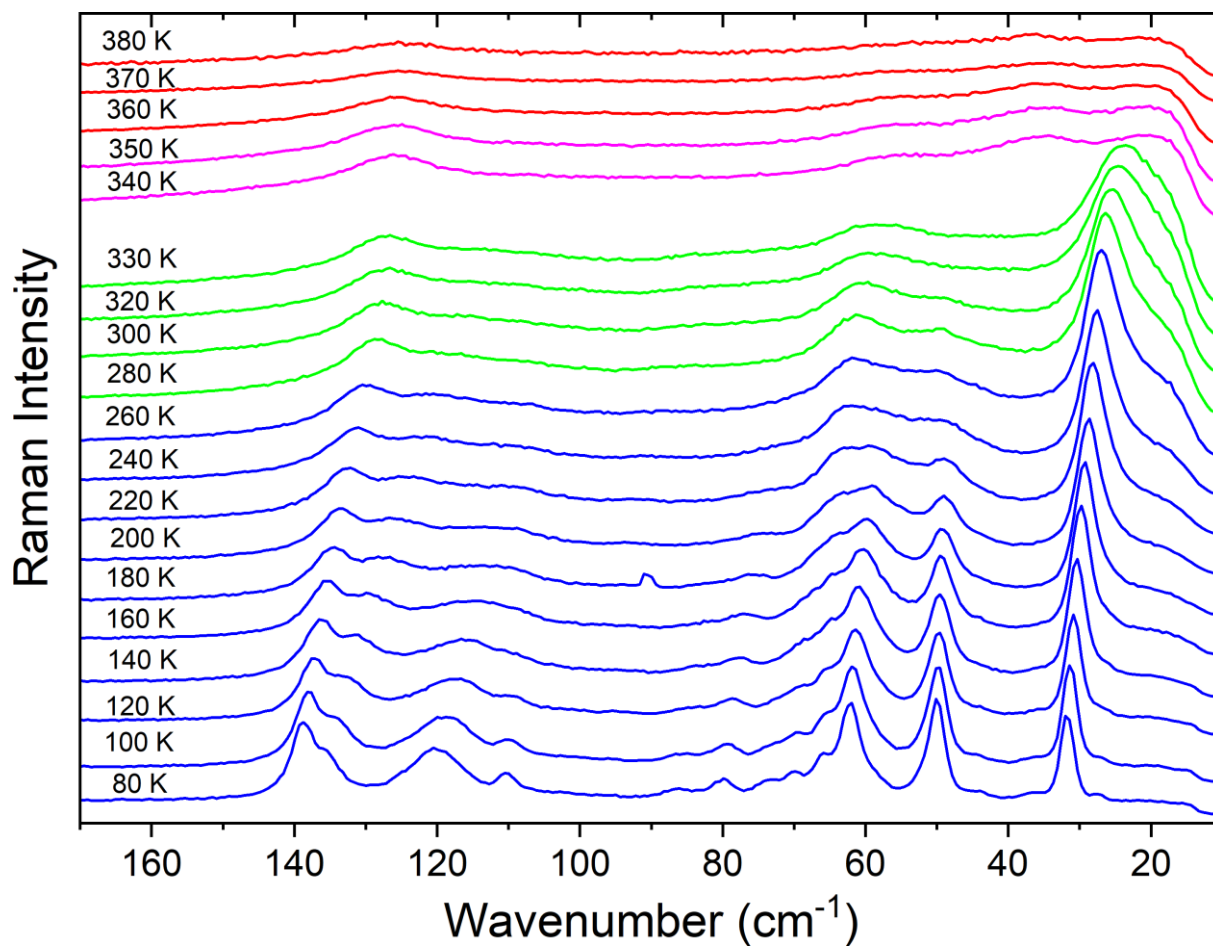

**Fig. S17.** Temperature-dependent Raman spectra in the 170-10  $\text{cm}^{-1}$  range.

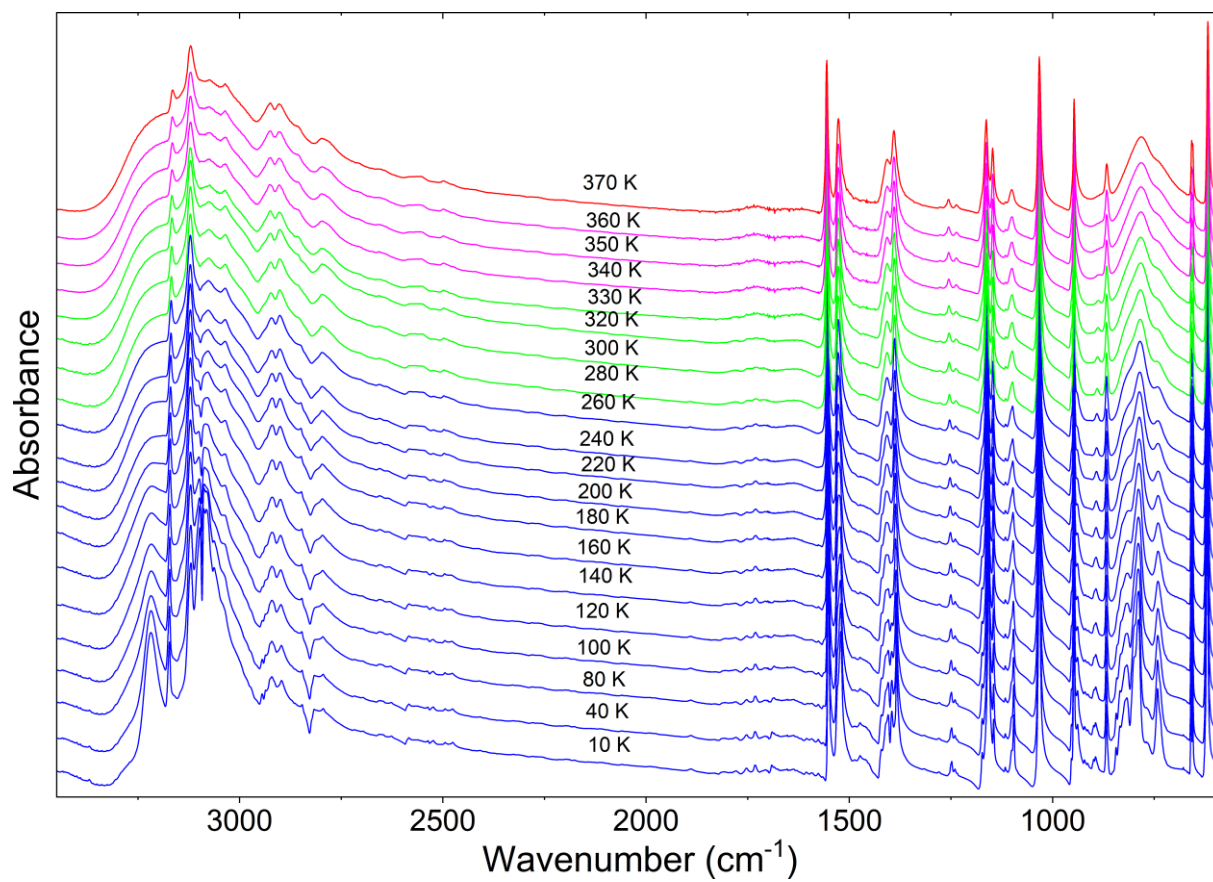

**Fig. S18.** Temperature-dependent IR spectra in the 3450-580 cm<sup>-1</sup> range.

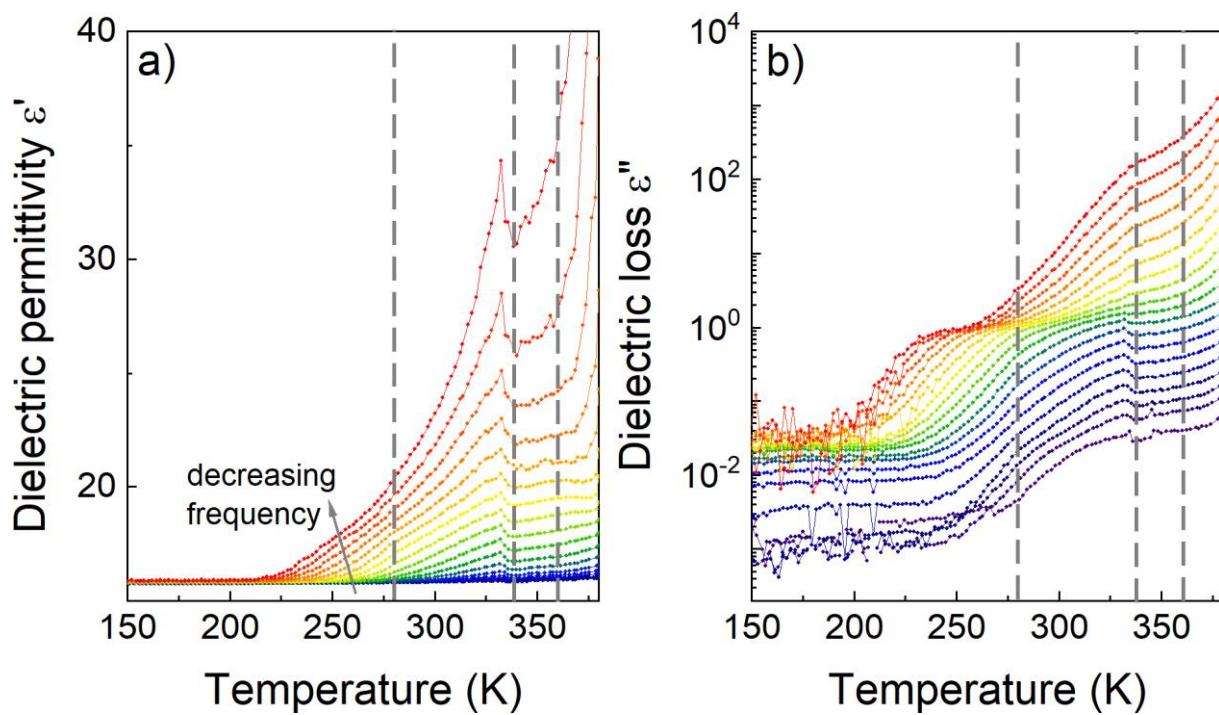

**Fig. S19.** Temperature dependence of (a) dielectric permittivity and (b) dielectric loss for selected frequencies. The vertical dashed lines indicate phase transition temperatures.

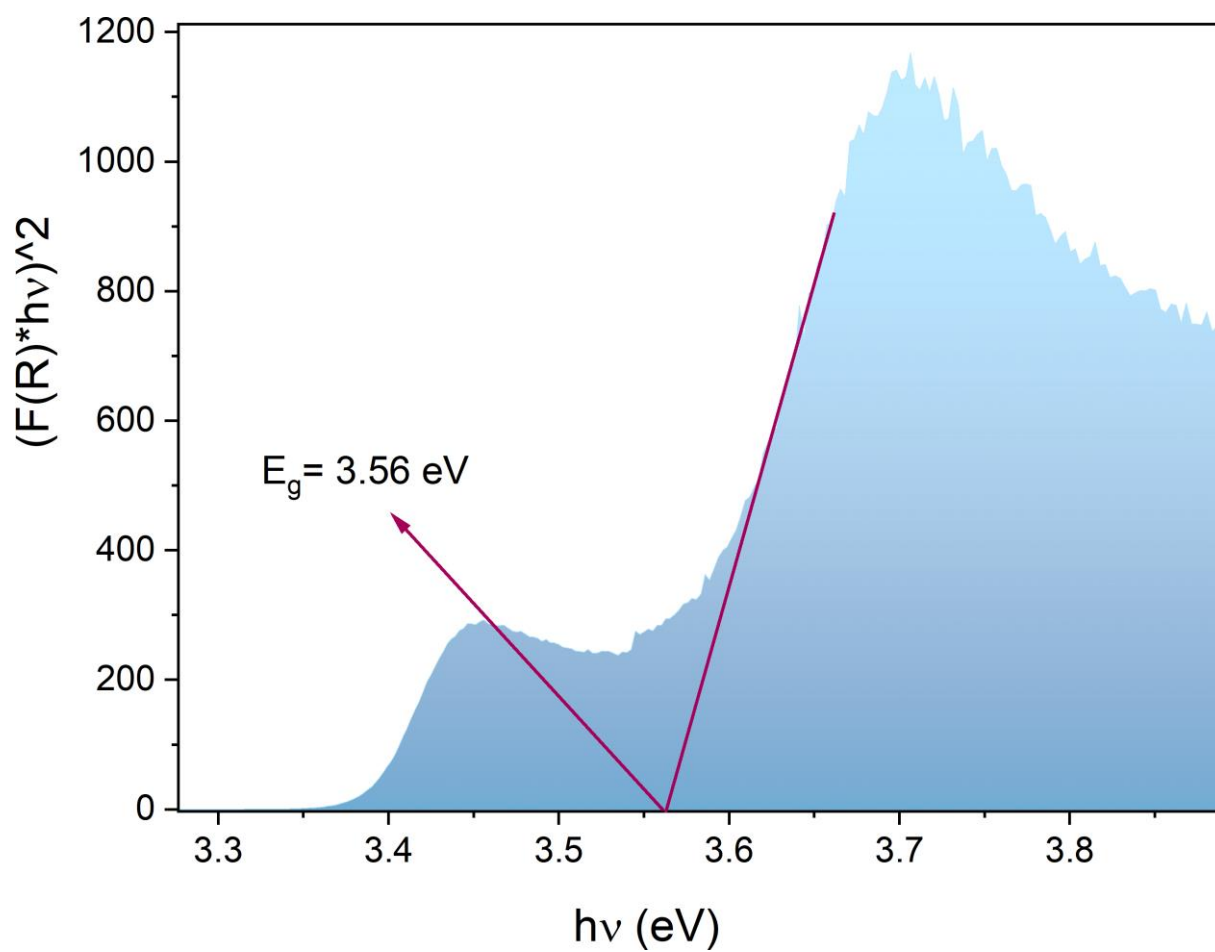

**Fig. S20.** Band gap ( $E_g$ ) estimation with Tauc plot for  $Tz_2PbCl_4$ .

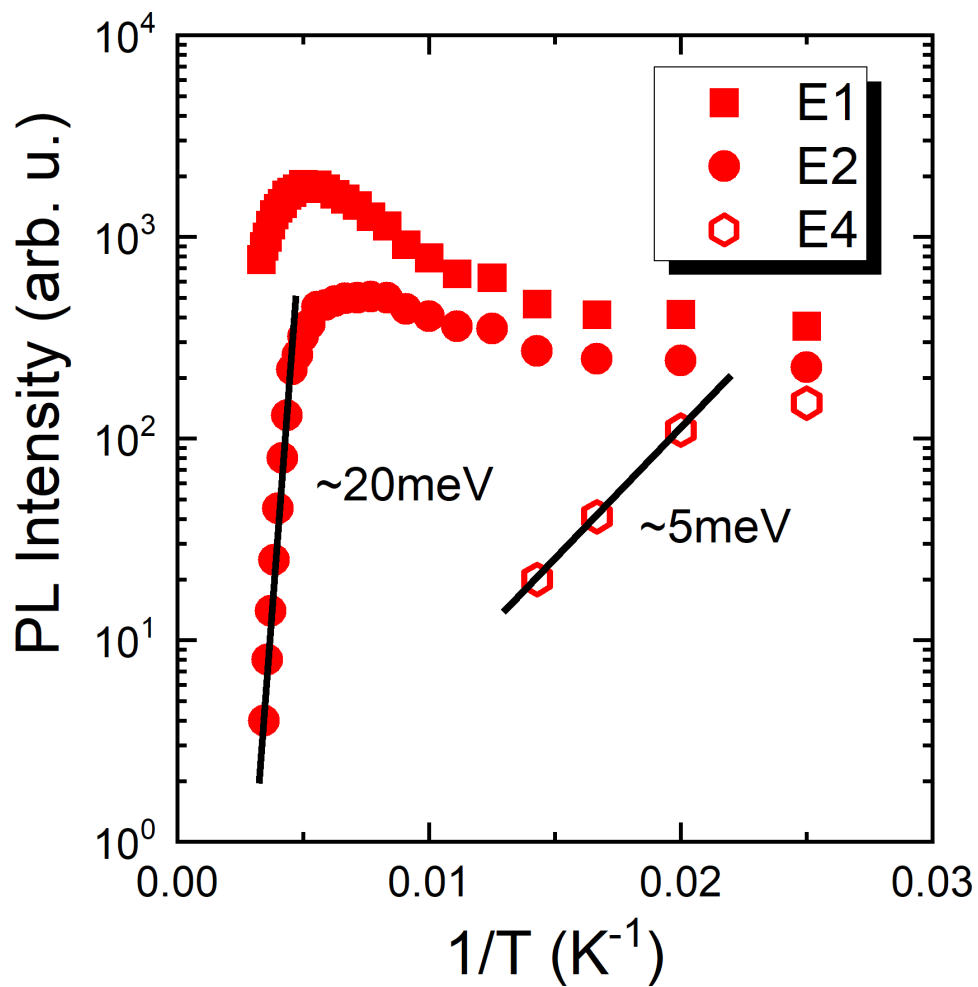

**Fig. S21.** Emission integrated intensity of E1, E2 and E3 plotted on a  $1/T$  scale. Activation energies are determined according to the formula:  $I(T) \propto \exp(-E_a/kT)$ , where  $I$  is the intensity,  $E_a$  is the activation energy and  $T$  is the temperature.

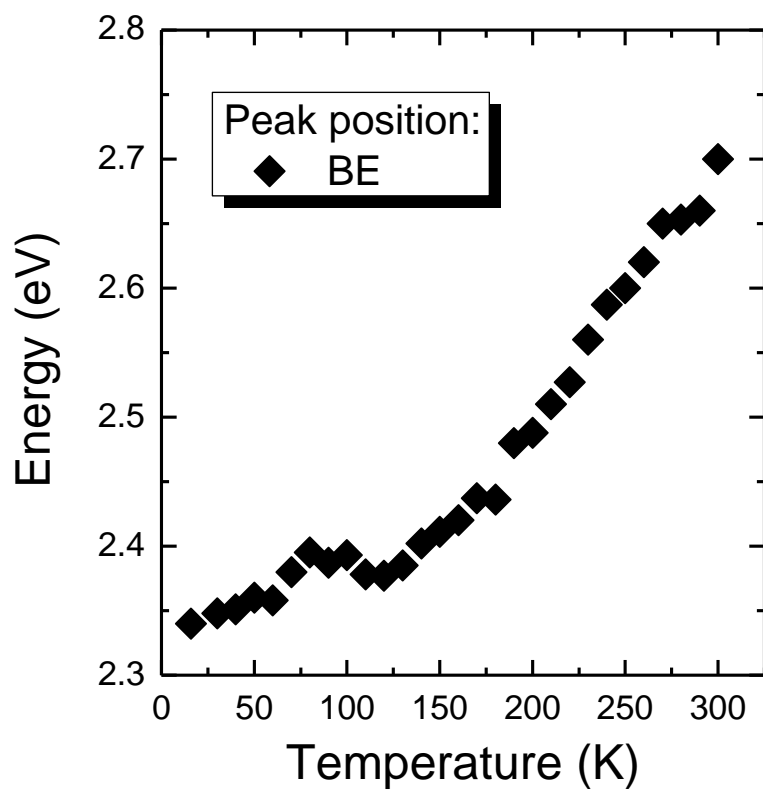

**Fig. S22.** Temperature dependence of the positions of BE PL peak.

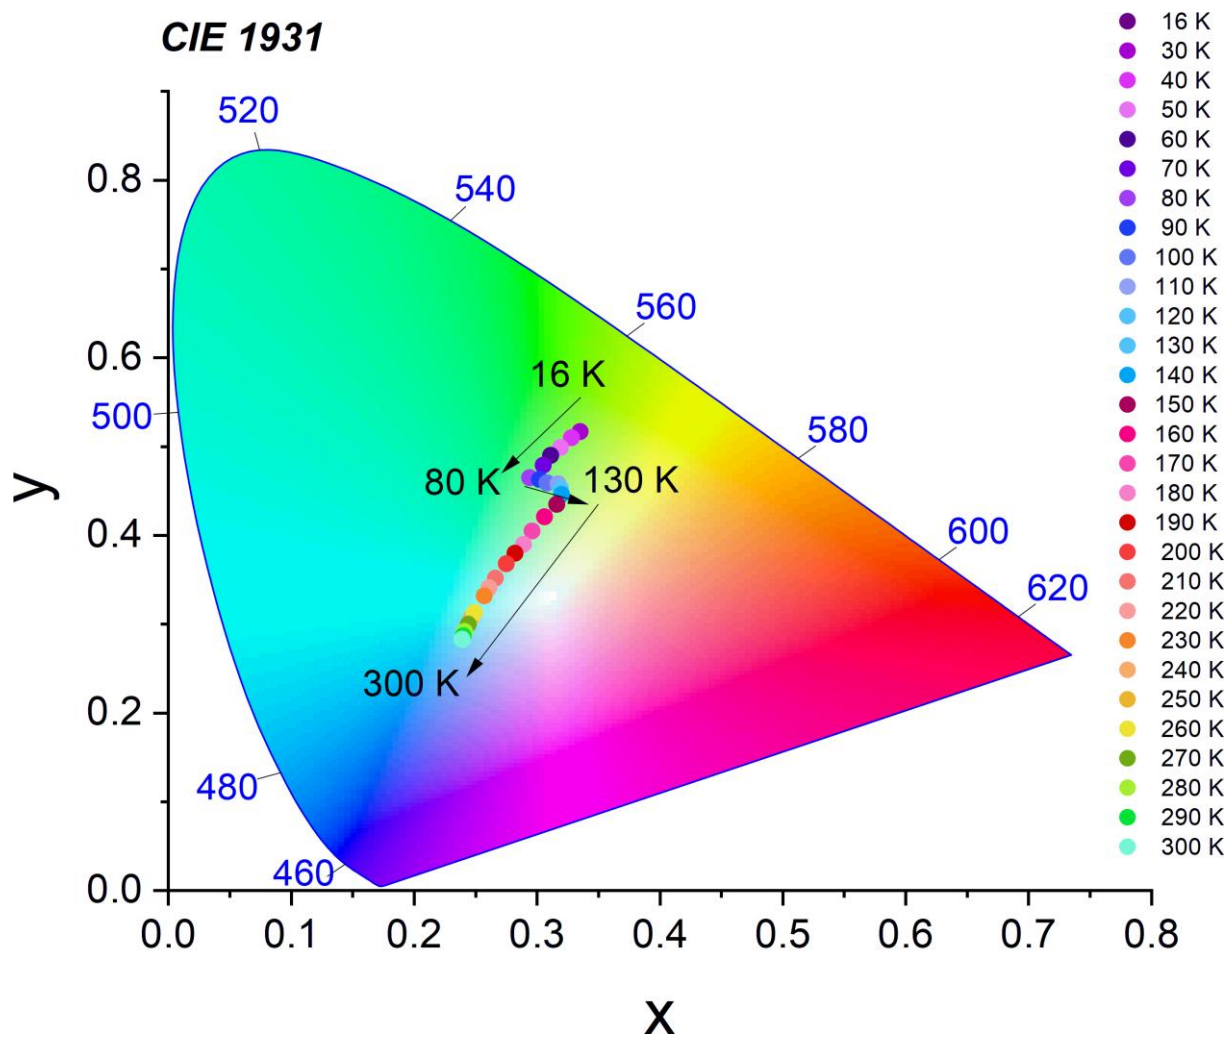

**Fig. S23.** CIE coordinates of  $Tz_2PbCl_4$  crystal.



## checkCIF/PLATON report

Structure factors have been supplied for datablock(s) triag2pbcl4\_i\_370\_00, triag2pbcl4\_i\_390\_00, triag2pbcl4\_ii\_340\_00, triag2pbcl4\_ii\_360\_00, triag2pbcl4\_iii\_280\_00, triag2pbcl4\_iii\_300\_00, triag2pbcl4\_iii\_320\_00, triag2pbcl4\_iv\_100\_00, triag2pbcl4\_iv\_130\_00, triag2pbcl4\_iv\_150\_00, triag2pbcl4\_iv\_180\_00, triag2pbcl4\_iv\_200\_00, triag2pbcl4\_iv\_220\_00, triag2pbcl4\_iv\_250\_00

THIS REPORT IS FOR GUIDANCE ONLY. IF USED AS PART OF A REVIEW PROCEDURE FOR PUBLICATION, IT SHOULD NOT REPLACE THE EXPERTISE OF AN EXPERIENCED CRYSTALLOGRAPHIC REFEREE.

No syntax errors found.      CIF dictionary      Interpreting this report

### Datablock: triag2pbcl4\_i\_390\_00

---

|                                 |                                                                                                                                       |                                                                 |
|---------------------------------|---------------------------------------------------------------------------------------------------------------------------------------|-----------------------------------------------------------------|
| Bond precision: N- C = 0.0110 A |                                                                                                                                       | Wavelength=0.71073                                              |
| Cell:                           | a=7.6009(7)                                                                                                                           | b=8.3017(6)      c=21.798(2)                                    |
|                                 | alpha=90                                                                                                                              | beta=90      gamma=90                                           |
| Temperature:                    | 390 K                                                                                                                                 |                                                                 |
|                                 | Calculated                                                                                                                            | Reported                                                        |
| Volume                          | 1375.5(2)                                                                                                                             | 1375.4(2)                                                       |
| Space group                     | F m m m                                                                                                                               | F m m m                                                         |
| Hall group                      | -F 2 2                                                                                                                                | -F 2 2                                                          |
| Moiety formula                  | 4(Cl Pb <sub>0.25</sub> ), 2(C <sub>2</sub> H <sub>4</sub> N <sub>3</sub> ) Cl <sub>4</sub> Pb, 4(C H <sub>2</sub> N <sub>1.5</sub> ) |                                                                 |
| Sum formula                     | C <sub>4</sub> H <sub>8</sub> Cl <sub>4</sub> N <sub>6</sub> Pb                                                                       | C <sub>4</sub> H <sub>8</sub> Cl <sub>4</sub> N <sub>6</sub> Pb |
| Mr                              | 489.16                                                                                                                                | 489.15                                                          |
| Dx, g cm <sup>-3</sup>          | 2.362                                                                                                                                 | 2.362                                                           |
| Z                               | 4                                                                                                                                     | 4                                                               |
| Mu (mm <sup>-1</sup> )          | 13.022                                                                                                                                | 13.023                                                          |
| F000                            | 896.0                                                                                                                                 | 896.0                                                           |
| F000'                           | 885.70                                                                                                                                |                                                                 |
| h,k,lmax                        | 10,11,29                                                                                                                              | 10,11,29                                                        |
| Nref                            | 539                                                                                                                                   | 513                                                             |
| Tmin,Tmax                       | 0.110,0.210                                                                                                                           | 0.069,1.000                                                     |

Tmin' 0.001

Correction method= # Reported T Limits: Tmin=0.069 Tmax=1.000

AbsCorr = MULTI-SCAN

Data completeness= 0.952 Theta(max)= 29.013 wR2(reflections)=

R(reflections)= 0.0251( 512)

0.0525( 513)

S = 1.038

Npar= 30

---

The following ALERTS were generated. Each ALERT has the format **test-name\_ALERT\_alert-type\_alert-level**. Click on the hyperlinks for more details of the test.

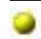

**Alert level C**

PLAT029\_ALERT\_3\_C\_diffn\_measured\_fraction\_theta\_full value Low . 0.975 Why?

PLAT042\_ALERT\_1\_C Calc. and Reported MoietyFormula Strings Differ Please Check

Calc: 4(C1 Pb0.25), 2(C2 H4 N3)

Rep.: C14 Pb, 4(C H2 N1.5)

PLAT242\_ALERT\_2\_C Low 'MainMol' Ueq as Compared to Neighbors of Pb1 Check

PLAT242\_ALERT\_2\_C Low 'MainMol' Ueq as Compared to Neighbors of N1 Check

PLAT260\_ALERT\_2\_C Large Average Ueq of Residue Including N1 0.105 Check

PLAT911\_ALERT\_3\_C Missing FCF Refl Between Thmin & STh/L= 0.600 8 Report

0 2 0, 0 4 0, 2 0 4, 0 0 10, 0 0 12, 0 0 14,

0 0 16, 0 2 16,

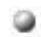

**Alert level G**

PLAT004\_ALERT\_5\_G Polymeric Structure Found with Maximum Dimension 2 Info

PLAT007\_ALERT\_5\_G Number of Unrefined Donor-H Atoms ..... 1 Report

H1A

PLAT013\_ALERT\_1\_G N.O.K. \_shelx\_hkl\_checksum Found in CIF ..... Please Check

PLAT093\_ALERT\_1\_G No s.u.'s on H-positions, Refinement Reported as mixed Check

PLAT168\_ALERT\_4\_G The CIF-Embedded .res File Contains EXYZ Records 1 Report

PLAT171\_ALERT\_4\_G The CIF-Embedded .res File Contains EADP Records 1 Report

PLAT187\_ALERT\_4\_G The CIF-Embedded .res File Contains RIGU Records 1 Report

PLAT300\_ALERT\_4\_G Atom Site Occupancy of N2 Constrained at 0.5 Check

PLAT300\_ALERT\_4\_G Atom Site Occupancy of C2 Constrained at 0.5 Check

PLAT300\_ALERT\_4\_G Atom Site Occupancy of H1A Constrained at 0.5 Check

PLAT300\_ALERT\_4\_G Atom Site Occupancy of H1B Constrained at 0.5 Check

PLAT300\_ALERT\_4\_G Atom Site Occupancy of H2 Constrained at 0.5 Check

PLAT301\_ALERT\_3\_G Main Residue Disorder .....(Resd 2) 57% Note

PLAT794\_ALERT\_5\_G Tentative Bond Valency for Pb1 (II) . 2.68 Info

PLAT860\_ALERT\_3\_G Number of Least-Squares Restraints ..... 15 Note

PLAT883\_ALERT\_1\_G No Info/Value for \_atom\_sites\_solution\_primary . Please Do !

PLAT910\_ALERT\_3\_G Missing # of FCF Reflection(s) Below Theta(Min). 1 Note

0 0 2,

PLAT912\_ALERT\_4\_G Missing # of FCF Reflections Above STh/L= 0.600 17 Note

PLAT933\_ALERT\_2\_G Number of HKL-OMIT Records in Embedded .res File 10 Note

0 0 10, 0 0 12, 0 0 14, 0 0 16, 0 2 0, 0 2 16,

0 4 0, 2 0 4, 4 6 22, 5 3 25,

PLAT961\_ALERT\_5\_G Dataset Contains no Negative Intensities ..... Please Check

PLAT969\_ALERT\_5\_G The 'Henn et al.' R-Factor-gap value ..... 2.09 Note

Predicted wR2: Based on SigI\*\*2 2.51 or SHELX Weight 5.21

- 
- 0 **ALERT level A** = Most likely a serious problem - resolve or explain
- 0 **ALERT level B** = A potentially serious problem, consider carefully
- 6 **ALERT level C** = Check. Ensure it is not caused by an omission or oversight

21 **ALERT level G** = General information/check it is not something unexpected

4 ALERT type 1 CIF construction/syntax error, inconsistent or missing data

4 ALERT type 2 Indicator that the structure model may be wrong or deficient

5 ALERT type 3 Indicator that the structure quality may be low

9 ALERT type 4 Improvement, methodology, query or suggestion

5 ALERT type 5 Informative message, check

---

## Datablock: triag2pbcl4\_i\_370\_00

---

|                                 |                                                |             |                    |
|---------------------------------|------------------------------------------------|-------------|--------------------|
| Bond precision: N- C = 0.0100 A |                                                |             | Wavelength=0.71073 |
| Cell:                           | a=7.5639(2)                                    | b=8.2984(2) | c=21.7768(7)       |
|                                 | alpha=90                                       | beta=90     | gamma=90           |
| Temperature:                    | 370 K                                          |             |                    |
|                                 | Calculated                                     |             | Reported           |
| Volume                          | 1366.89(7)                                     |             | 1366.89(7)         |
| Space group                     | F m m m                                        |             | F m m m            |
| Hall group                      | -F 2 2                                         |             | -F 2 2             |
| Moiety formula                  | 4(Cl Pb0.25), 2(C2 H4 N3) Cl4 Pb, 4(C H2 N1.5) |             |                    |
| Sum formula                     | C4 H8 Cl4 N6 Pb                                |             | C4 H8 Cl4 N6 Pb    |
| Mr                              | 489.16                                         |             | 489.15             |
| Dx,g cm-3                       | 2.377                                          |             | 2.377              |
| Z                               | 4                                              |             | 4                  |
| Mu (mm-1)                       | 13.104                                         |             | 13.104             |
| F000                            | 896.0                                          |             | 896.0              |
| F000'                           | 885.70                                         |             |                    |
| h,k,lmax                        | 10,11,29                                       |             | 10,11,29           |
| Nref                            | 537                                            |             | 515                |
| Tmin,Tmax                       | 0.109,0.208                                    |             | 0.043,0.194        |

Tmin' 0.001

Correction method= # Reported T Limits: Tmin=0.043 Tmax=0.194

AbsCorr = ANALYTICAL

Data completeness= 0.959

Theta(max)= 29.009

R(reflections)= 0.0219( 515)

wR2(reflections)=

0.0466( 515)

S = 1.085

Npar= 30

---

The following ALERTS were generated. Each ALERT has the format **test-name\_ALERT\_alert-type\_alert-level**. Click on the hyperlinks for more details of the test.

---

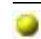

**Alert level C**

PLAT042\_ALERT\_1\_C Calc. and Reported MoietyFormula Strings Differ Please Check

Calc: 4(C1 Pb0.25), 2(C2 H4 N3)

Rep.: C14 Pb, 4(C H2 N1.5)

PLAT242\_ALERT\_2\_C Low 'MainMol' Ueq as Compared to Neighbors of Pb1 Check

PLAT242\_ALERT\_2\_C Low 'MainMol' Ueq as Compared to Neighbors of N1 Check

PLAT911\_ALERT\_3\_C Missing FCF Refl Between Thmin & STh/L= 0.600 6 Report

0 2 0, 2 0 4, 0 0 6, 0 0 8, 0 0 10, 0 0 14,

---

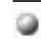

**Alert level G**

PLAT003\_ALERT\_2\_G Number of Uiso or Uij Restrained non-H Atoms ... 2 Report

PLAT004\_ALERT\_5\_G Polymeric Structure Found with Maximum Dimension 2 Info

PLAT007\_ALERT\_5\_G Number of Unrefined Donor-H Atoms ..... 1 Report

H1A

PLAT012\_ALERT\_1\_G N.O.K. \_shelx\_res\_checksum Found in CIF ..... Please Check

PLAT013\_ALERT\_1\_G N.O.K. \_shelx\_hkl\_checksum Found in CIF ..... Please Check

PLAT093\_ALERT\_1\_G No s.u.'s on H-positions, Refinement Reported as mixed Check

PLAT168\_ALERT\_4\_G The CIF-Embedded .res File Contains EXYZ Records 1  
Report

PLAT171\_ALERT\_4\_G The CIF-Embedded .res File Contains EADP Records 1 Report

PLAT186\_ALERT\_4\_G The CIF-Embedded .res File Contains ISOR Records 1 Report

PLAT187\_ALERT\_4\_G The CIF-Embedded .res File Contains RIGU Records 1 Report

PLAT300\_ALERT\_4\_G Atom Site Occupancy of N2 Constrained at 0.5 Check

PLAT300\_ALERT\_4\_G Atom Site Occupancy of C2 Constrained at 0.5 Check

PLAT300\_ALERT\_4\_G Atom Site Occupancy of H1A Constrained at 0.5 Check

PLAT300\_ALERT\_4\_G Atom Site Occupancy of H1B Constrained at 0.5 Check

PLAT300\_ALERT\_4\_G Atom Site Occupancy of H2 Constrained at 0.5 Check

PLAT301\_ALERT\_3\_G Main Residue Disorder .....(Resd 2) 57% Note

PLAT794\_ALERT\_5\_G Tentative Bond Valency for Pb1 (II) . 2.72 Info

PLAT860\_ALERT\_3\_G Number of Least-Squares Restraints ..... 27 Note

PLAT883\_ALERT\_1\_G No Info/Value for \_atom\_sites\_solution\_primary . Please Do !

PLAT910\_ALERT\_3\_G Missing # of FCF Reflection(s) Below Theta(Min). 1 Note

0 0 2,

PLAT912\_ALERT\_4\_G Missing # of FCF Reflections Above STh/L= 0.600 15 Note

PLAT933\_ALERT\_2\_G Number of HKL-OMIT Records in Embedded .res File 7 Note

0 0 6, 0 0 8, 0 0 10, 0 0 14, 0 2 0, 1 5 25,

2 0 4,

PLAT940\_ALERT\_3\_G Fsqd Refinement With  $I > n * \text{Sigma}(I)$  Only ..... Please Check

PLAT961\_ALERT\_5\_G Dataset Contains no Negative Intensities ..... Please Check

PLAT969\_ALERT\_5\_G The 'Henn et al.' R-Factor-gap value ..... 2.12 Note

Predicted wR2: Based on  $\text{SigI}^{**2}$  2.20 or SHELX Weight 4.43

---

0 **ALERT level A** = Most likely a serious problem - resolve or explain

0 **ALERT level B** = A potentially serious problem, consider carefully

- 4 **ALERT level C** = Check. Ensure it is not caused by an omission or oversight
- 25 **ALERT level G** = General information/check it is not something unexpected
- 5 ALERT type 1 CIF construction/syntax error, inconsistent or missing data 4
- ALERT type 2 Indicator that the structure model may be wrong or deficient
- 5 ALERT type 3 Indicator that the structure quality may be low
- 10 ALERT type 4 Improvement, methodology, query or suggestion
- 5 ALERT type 5 Informative message, check

## Datablock: triag2pbcl4\_ii\_360\_00

|                                 |                     |                          |
|---------------------------------|---------------------|--------------------------|
| Bond precision: N- C = 0.0070 Å |                     | Wavelength=0.71073       |
| Cell:                           | a=8.2929(2)         | b=7.5535(2) c=21.7496(7) |
|                                 | alpha=90            | beta=90 gamma=90         |
| Temperature:                    | 360 K               |                          |
|                                 | Calculated          | Reported                 |
| Volume                          | 1362.40(7)          | 1362.40(7)               |
| Space group                     | C m c m             | C m c m                  |
| Hall group                      | -C 2c 2             | -C 2c 2                  |
| Moiety formula                  | Cl4 Pb, 2(C2 H4 N3) | Cl4 Pb, 2(C2 H4 N3)      |
| Sum formula                     | C4 H8 Cl4 N6 Pb     | C4 H8 Cl4 N6 Pb          |
| Mr                              | 489.16              | 489.15                   |
| Dx,g cm-3                       | 2.385               | 2.385                    |
| Z                               | 4                   | 4                        |
| Mu (mm-1)                       | 13.148              | 13.148                   |
| F000                            | 896.0               | 896.0                    |
| F000'                           | 885.70              |                          |

h,k,lmax 11,10,29 11,10,29  
Nref 1002 957  
Tmin,Tmax 0.108,0.206 0.041,0.194  
Tmin' 0.001

Correction method= # Reported T Limits: Tmin=0.041 Tmax=0.194

AbsCorr = ANALYTICAL

Data completeness= 0.955 Theta(max)= 29.073

R(reflections)= 0.0233( 729) wR2(reflections)=

S = 1.131 Npar= 43 0.0502( 957)

---

The following ALERTS were generated. Each ALERT has the format **test-name\_ALERT\_alert-type\_alert-level**. Click on the hyperlinks for more details of the test.

---

 **Alert level B**

PLAT110\_ALERT\_2\_B ADDSYM Detects Potential Lattice Translation ... ? Check

**Author Response: The symmetry has been thoroughly inspected by the presence of systemat**

PLAT112\_ALERT\_2\_B ADDSYM Detects New (Pseudo) Symm. Elem A 100 %Fit

**Author Response: Look PLAT110**

PLAT113\_ALERT\_2\_B ADDSYM Suggests Possible Pseudo/New Space Group Fmmm  
Check

WARNING: Disordered Atoms Excluded from Analysis

Check Model Parameter Symmetry for Reflection Data Support

**Author Response: Look PLAT110**

---

 **Alert level C**



PLAT242\_ALERT\_2\_C Low 'MainMol' Ueq as Compared to Neighbors of Pb1 Check  
 PLAT242\_ALERT\_2\_C Low 'MainMol' Ueq as Compared to Neighbors of N1 Check  
 PLAT905\_ALERT\_3\_C Negative K value in the Analysis of Variance ... -0.017 Report  
 PLAT911\_ALERT\_3\_C Missing FCF Refl Between Thmin & STh/L= 0.600 11  
 Report  
 2 0 0, 3 1 0, 4 0 0, 1 1 2, 0 2 3, 1 1 4,  
 3 1 4, 0 0 6, 1 1 7, 0 0 10, 0 0 16,

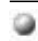

**Alert level G**

PLAT004\_ALERT\_5\_G Polymeric Structure Found with Maximum Dimension 2 Info  
 PLAT007\_ALERT\_5\_G Number of Unrefined Donor-H Atoms ..... 1 Report  
 H1A  
 PLAT013\_ALERT\_1\_G N.O.K. \_shelx\_hkl\_checksum Found in CIF ..... Please Check  
 PLAT093\_ALERT\_1\_G No s.u.'s on H-positions, Refinement Reported as mixed Check  
 PLAT116\_ALERT\_2\_G ADDSYM Included (Pseudo) Lattice Translation ... Please Check  
 PLAT168\_ALERT\_4\_G The CIF-Embedded .res File Contains EXYZ Records 1  
 Report  
 PLAT171\_ALERT\_4\_G The CIF-Embedded .res File Contains EADP Records 1 Report  
 PLAT300\_ALERT\_4\_G Atom Site Occupancy of N2 Constrained at 0.5 Check  
 PLAT300\_ALERT\_4\_G Atom Site Occupancy of C2 Constrained at 0.5 Check  
 PLAT300\_ALERT\_4\_G Atom Site Occupancy of H1A Constrained at 0.5 Check  
 PLAT300\_ALERT\_4\_G Atom Site Occupancy of H1B Constrained at 0.5 Check  
 PLAT300\_ALERT\_4\_G Atom Site Occupancy of H2 Constrained at 0.5 Check  
 PLAT301\_ALERT\_3\_G Main Residue Disorder .....(Resd 2) 40% Note  
 PLAT764\_ALERT\_4\_G Overcomplete CIF Bond List Detected (Rep/Expd) . 1.11 Ratio  
 PLAT794\_ALERT\_5\_G Tentative Bond Valency for Pb1 (II) . 2.73 Info  
 PLAT802\_ALERT\_4\_G CIF Input Record(s) with more than 80 Characters 1 Info  
 PLAT883\_ALERT\_1\_G No Info/Value for \_atom\_sites\_solution\_primary . Please Do !  
 PLAT910\_ALERT\_3\_G Missing # of FCF Reflection(s) Below Theta(Min). 2 Note

1 1 0, 0 0 2,

PLAT912\_ALERT\_4\_G Missing # of FCF Reflections Above STh/L= 0.600 30 Note

PLAT933\_ALERT\_2\_G Number of HKL-OMIT Records in Embedded .res File 12 Note

0 0 6, 0 0 10, 0 0 16, 0 2 3, 1 1 0, 1 1 2,

1 1 4, 1 1 7, 2 0 0, 3 1 0, 3 1 4, 4 0 0,

PLAT955\_ALERT\_1\_G Reported (CIF) and Actual (FCF) Lmax Differ by . 1 Units

PLAT969\_ALERT\_5\_G The 'Henn et al.' R-Factor-gap value ..... 2.09 Note

Predicted wR2: Based on SigI\*\*2 2.41 or SHELX Weight 4.54

---

0 **ALERT level A** = Most likely a serious problem - resolve or explain

3 **ALERT level B** = A potentially serious problem, consider carefully

4 **ALERT level C** = Check. Ensure it is not caused by an omission or oversight

22 **ALERT level G** = General information/check it is not something unexpected

4 ALERT type 1 CIF construction/syntax error, inconsistent or missing data

7 ALERT type 2 Indicator that the structure model may be wrong or deficient

4 ALERT type 3 Indicator that the structure quality may be low

10 ALERT type 4 Improvement, methodology, query or suggestion

4 ALERT type 5 Informative message, check

---

## Datablock: triag2pbcl4\_ii\_340\_00

---

Bond precision: N- C = 0.0130 A

Wavelength=0.71073

Cell: a=8.2959(15) b=7.4918(15) c=21.829(6)

alpha=90 beta=90 gamma=90

Temperature: 340 K

Calculated Reported

Volume 1356.7(5) 1356.7(5)

Space group C m c m C m c m

|                                                               |                     |                     |
|---------------------------------------------------------------|---------------------|---------------------|
| Hall group                                                    | -C 2c 2             | -C 2c 2             |
| Moiety formula                                                | Cl4 Pb, 2(C2 H4 N3) | Cl4 Pb, 2(C2 H4 N3) |
| Sum formula                                                   | C4 H8 Cl4 N6 Pb     | C4 H8 Cl4 N6 Pb     |
| Mr                                                            | 489.16              | 489.15              |
| Dx,g cm-3                                                     | 2.395               | 2.395               |
| Z                                                             | 4                   | 4                   |
| Mu (mm-1)                                                     | 13.203              | 13.203              |
| F000                                                          | 896.0               | 896.0               |
| F000'                                                         | 885.70              |                     |
| h,k,lmax                                                      | 11,10,29            | 11,10,29            |
| Nref                                                          | 986                 | 905                 |
| Tmin,Tmax                                                     | 0.107,0.205         | 0.059,0.255         |
| Tmin'                                                         | 0.001               |                     |
| Correction method= # Reported T Limits: Tmin=0.059 Tmax=0.255 |                     |                     |
| AbsCorr = ANALYTICAL                                          |                     |                     |
| Data completeness= 0.918                                      | Theta(max)= 28.889  | wR2(reflections)=   |
| R(reflections)= 0.0343( 765)                                  |                     | 0.0913( 905)        |
| S = 1.151                                                     | Npar= 44            |                     |

The following ALERTS were generated. Each ALERT has the format **test-name\_ALERT\_alert-type\_alert-level**. Click on the hyperlinks for more details of the test.

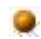

**Alert level B**

PLAT110\_ALERT\_2\_B ADDSYM Detects Potential Lattice Translation ... ? Check

**Author Response: The symmetry has been thoroughly inspected by the presence of systemat**

PLAT112\_ALERT\_2\_B ADDSYM Detects New (Pseudo) Symm. Elem A 100 %Fit

**Author Response: Look PLAT110**

PLAT113\_ALERT\_2\_B ADDSYM Suggests Possible Pseudo/New Space Group Fmmm  
Check

WARNING: Disordered Atoms Excluded from Analysis

Check Model Parameter Symmetry for Reflection Data Support

**Author Response: Look PLAT110**

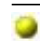

**Alert level C**

PLAT222\_ALERT\_3\_C NonSolvent Resd 2 H Uiso(max)/Uiso(min) Range 7.6 Ratio  
PLAT242\_ALERT\_2\_C Low 'MainMol' Ueq as Compared to Neighbors of Pb1 Check  
PLAT242\_ALERT\_2\_C Low 'MainMol' Ueq as Compared to Neighbors of N1 Check  
PLAT260\_ALERT\_2\_C Large Average Ueq of Residue Including N1 0.107 Check  
PLAT911\_ALERT\_3\_C Missing FCF Refl Between Thmin & STh/L= 0.600 9 Report  
2 0 0, 2 2 0, 4 0 0, 6 2 0, 3 1 1, 5 1 1,  
4 0 2, 1 1 4, 0 0 6,  
PLAT972\_ALERT\_2\_C Check Calcd Resid. Dens. 0.82Ang From Pb1 -2.03 eA-3  
PLAT972\_ALERT\_2\_C Check Calcd Resid. Dens. 0.91Ang From Pb1 -1.99 eA-3  
PLAT973\_ALERT\_2\_C Check Calcd Positive Resid. Density on Pb1 1.16 eA-3

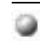

**Alert level G**

PLAT004\_ALERT\_5\_G Polymeric Structure Found with Maximum Dimension 2 Info  
PLAT007\_ALERT\_5\_G Number of Unrefined Donor-H Atoms ..... 1 Report  
H1A  
PLAT012\_ALERT\_1\_G N.O.K. \_shelx\_res\_checksum Found in CIF ..... Please Check  
PLAT013\_ALERT\_1\_G N.O.K. \_shelx\_hkl\_checksum Found in CIF ..... Please Check  
PLAT083\_ALERT\_2\_G SHELXL Second Parameter in WGHT Unusually Large 9.59  
Why ?  
PLAT093\_ALERT\_1\_G No s.u.'s on H-positions, Refinement Reported as mixed Check  
PLAT116\_ALERT\_2\_G ADDSYM Included (Pseudo) Lattice Translation ... Please Check

PLAT168\_ALERT\_4\_G The CIF-Embedded .res File Contains EXYZ Records 1  
Report

PLAT171\_ALERT\_4\_G The CIF-Embedded .res File Contains EADP Records 1 Report

PLAT300\_ALERT\_4\_G Atom Site Occupancy of N2 Constrained at 0.5 Check

PLAT300\_ALERT\_4\_G Atom Site Occupancy of C2 Constrained at 0.5 Check

PLAT300\_ALERT\_4\_G Atom Site Occupancy of H1A Constrained at 0.5 Check

PLAT300\_ALERT\_4\_G Atom Site Occupancy of H1B Constrained at 0.5 Check

PLAT300\_ALERT\_4\_G Atom Site Occupancy of H2 Constrained at 0.5 Check

PLAT301\_ALERT\_3\_G Main Residue Disorder .....(Resd 2) 40% Note

PLAT650\_ALERT\_4\_G SWAT Instruction Used to Model Solvent Disorder ! Report

PLAT764\_ALERT\_4\_G Overcomplete CIF Bond List Detected (Rep/Expd) . 1.11 Ratio

PLAT794\_ALERT\_5\_G Tentative Bond Valency for Pb1 (II) . 2.76 Info

PLAT802\_ALERT\_4\_G CIF Input Record(s) with more than 80 Characters 1 Info

PLAT883\_ALERT\_1\_G No Info/Value for \_atom\_sites\_solution\_primary . Please Do !

PLAT910\_ALERT\_3\_G Missing # of FCF Reflection(s) Below Theta(Min). 3 Note

1 1 0, 0 0 2, 0 0 4,

PLAT912\_ALERT\_4\_G Missing # of FCF Reflections Above STh/L= 0.600 67 Note

PLAT913\_ALERT\_3\_G Missing # of Very Strong Reflections in FCF .... 2 Note

2 2 0, 0 0 6,

PLAT933\_ALERT\_2\_G Number of HKL-OMIT Records in Embedded .res File 13 Note

0 0 4, 0 0 6, 0 10 1, 1 1 0, 1 1 4, 2 0 0,

2 2 0, 3 1 1, 4 0 0, 4 0 2, 5 1 1, 6 2 0,

7 7 8,

PLAT955\_ALERT\_1\_G Reported (CIF) and Actual (FCF) Lmax Differ by . 1 Units

PLAT969\_ALERT\_5\_G The 'Henn et al.' R-Factor-gap value ..... 3.46 Note

Predicted wR2: Based on SigI\*\*2 2.64 or SHELX Weight 8.13

---

0 **ALERT level A** = Most likely a serious problem - resolve or explain

3 **ALERT level B** = A potentially serious problem, consider carefully

8 **ALERT level C** = Check. Ensure it is not caused by an omission or oversight  
26 **ALERT level G** = General information/check it is not something unexpected  
5 ALERT type 1 CIF construction/syntax error, inconsistent or missing data  
12 ALERT type 2 Indicator that the structure model may be wrong or deficient  
5 ALERT type 3 Indicator that the structure quality may be low  
11 ALERT type 4 Improvement, methodology, query or suggestion  
4 ALERT type 5 Informative message, check

---

## **Datablock: triag2pbcl4\_iii\_320\_00**

---

Bond precision: N- N = 0.0090 Å

Wavelength=0.71073

|       |             |              |             |
|-------|-------------|--------------|-------------|
| Cell: | a=7.5195(2) | b=21.5921(7) | c=8.3020(2) |
|       | alpha=90    | beta=90      | gamma=90    |

Temperature: 320 K

|                |                     |                     |
|----------------|---------------------|---------------------|
|                | 1347.93(7)          | 1347.93(7)          |
|                | P n m a             | P n m a             |
|                | -P 2ac 2n           | -P 2ac 2n           |
| Moiety formula | C14 Pb, 2(C2 H4 N3) | C14 Pb, 2(C2 H4 N3) |
| Sum formula    | C4 H8 Cl4 N6 Pb     | C4 H8 Cl4 N6 Pb     |
| Mr             | 489.16              | 489.15              |
| Dx,g cm-3      | 2.411               | 2.410               |
| Z              | 4                   | 4                   |
| Mu (mm-1)      | 13.289              | 13.289              |
| F000           | 896.0               | 896.0               |
| F000'          | 885.70              |                     |
| h,k,lmax       | 10,29,11            | 10,29,11            |
| Nref           | 1872                | 1768                |
| Tmin,Tmax      | 0.022,0.148         | 0.040,0.190         |
| Tmin'          | 0.000               |                     |

Correction method= # Reported T Limits: Tmin=0.040 Tmax=0.190

AbsCorr = ANALYTICAL

Data completeness= 0.944

Theta(max)= 29.160

R(reflections)= 0.0266( 1180)

wR2(reflections)=

0.0515( 1768)

S = 1.118

Npar= 78

The following ALERTS were generated. Each ALERT has the format **test-name\_ALERT\_alert-type\_alert-level**. Click on the hyperlinks for more details of the test.

 **Alert level A**

PLAT027\_ALERT\_3\_A\_diffn\_reflns\_theta\_full value (too) Low ..... 20.00 Degree

**Author Response: This data comes from high-temperature measurements which inflicted the**

 **Alert level C**

PLAT029\_ALERT\_3\_C\_diffn\_measured\_fraction\_theta\_full value Low . 0.978 Why?

PLAT242\_ALERT\_2\_C Low 'MainMol' Ueq as Compared to Neighbors of Pb1 Check  
 PLAT905\_ALERT\_3\_C Negative K value in the Analysis of Variance ... -0.030 Report  
 PLAT911\_ALERT\_3\_C Missing FCF Refl Between Thmin & STh/L= 0.600 12  
 Report  
 0 10 0, 0 14 0, 0 3 1, 3 3 1, 0 5 1, 0 7 1,  
 3 7 1, 0 0 2, 3 1 3, 3 7 3, 0 0 4, 0 2 4,  
 PLAT971\_ALERT\_2\_C Check Calcd Resid. Dens. 2.14Ang From Cl1 1.76 eA-3

---

**Alert level G**

PLAT004\_ALERT\_5\_G Polymeric Structure Found with Maximum Dimension 2 Info  
 PLAT007\_ALERT\_5\_G Number of Unrefined Donor-H Atoms ..... 2 Report  
 H1 H2  
 PLAT063\_ALERT\_4\_G Crystal Size Possibly too Large for Beam Size .. 0.62 mm  
 PLAT794\_ALERT\_5\_G Tentative Bond Valency for Pb1 (II) . 2.63 Info  
 PLAT802\_ALERT\_4\_G CIF Input Record(s) with more than 80 Characters 1 Info  
 PLAT883\_ALERT\_1\_G No Info/Value for \_atom\_sites\_solution\_primary . Please Do !  
 PLAT910\_ALERT\_3\_G Missing # of FCF Reflection(s) Below Theta(Min). 2 Note  
 0 2 0, 0 1 1,  
 PLAT912\_ALERT\_4\_G Missing # of FCF Reflections Above STh/L= 0.600 90 Note  
 PLAT933\_ALERT\_2\_G Number of HKL-OMIT Records in Embedded .res File 13 Note  
 0 0 2, 0 0 4, 0 1 1, 0 2 4, 0 3 1, 0 5 1,  
 0 7 1, 0 10 0, 0 14 0, 3 1 3, 3 3 1, 3 7 1,  
 3 7 3,  
 PLAT969\_ALERT\_5\_G The 'Henn et al.' R-Factor-gap value ..... 2.04 Note  
 Predicted wR2: Based on SigI\*\*2 2.52 or SHELX Weight 4.71

---

1 **ALERT level A** = Most likely a serious problem - resolve or explain

0 **ALERT level B** = A potentially serious problem, consider carefully



- 5 **ALERT level C** = Check. Ensure it is not caused by an omission or oversight
- 10 **ALERT level G** = General information/check it is not something unexpected
- 1 ALERT type 1 CIF construction/syntax error, inconsistent or missing data
- 3 ALERT type 2 Indicator that the structure model may be wrong or deficient
- 5 ALERT type 3 Indicator that the structure quality may be low
- 3 ALERT type 4 Improvement, methodology, query or suggestion
- 4 ALERT type 5 Informative message, check
- 

## Datablock: triag2pbcl4\_iii\_300\_00

---

|                                 |                         |                          |                         |
|---------------------------------|-------------------------|--------------------------|-------------------------|
| Bond precision: N- C = 0.0085 A |                         | Wavelength=0.71073       |                         |
| Cell:                           | a=7.4929(3)<br>alpha=90 | b=21.5667(10)<br>beta=90 | c=8.3106(4)<br>gamma=90 |
| Temperature:                    | 300 K                   |                          |                         |
|                                 | 1342.97(10)             | 1342.97(10)              |                         |
|                                 | P n m a                 | P n m a                  |                         |
|                                 | -P 2ac 2n               | -P 2ac 2n                |                         |
| Moiety formula                  | C14 Pb, 2(C2 H4 N3)     | C14 Pb, 2(C2 H4 N3)      |                         |
| Sum formula                     | C4 H8 Cl4 N6 Pb         | C4 H8 Cl4 N6 Pb          |                         |
| Mr                              | 489.16                  | 489.15                   |                         |
| Dx,g cm-3                       | 2.419                   | 2.419                    |                         |
| Z                               | 4                       | 4                        |                         |
| Mu (mm-1)                       | 13.338                  | 13.338                   |                         |
| F000                            | 896.0                   | 896.0                    |                         |
| F000'                           | 885.70                  |                          |                         |
| h,k,lmax                        | 10,29,11                | 10,28,11                 |                         |
| Nref                            | 1823                    | 1675                     |                         |
| Tmin,Tmax                       | 0.104,0.202             | 0.059,0.248              |                         |
| Tmin'                           | 0.001                   |                          |                         |

Correction method= # Reported T Limits: Tmin=0.059 Tmax=0.248

AbsCorr = ANALYTICAL

Data completeness= 0.919

Theta(max)= 28.953

R(reflections)= 0.0275( 1299)

wR2(reflections)=

S = 1.114

Npar= 78

0.0656( 1675)

---

The following ALERTS were generated. Each ALERT has the format **test-name\_ALERT\_alert-type\_alert-level**. Click on the hyperlinks for more details of the test.

---

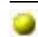

**Alert level C**

PLAT242\_ALERT\_2\_C Low 'MainMol' Ueq as Compared to Neighbors of Pb1 Check  
PLAT906\_ALERT\_3\_C Large K Value in the Analysis of Variance ..... 4.050 Check  
PLAT906\_ALERT\_3\_C Large K Value in the Analysis of Variance ..... 2.001 Check  
PLAT911\_ALERT\_3\_C Missing FCF Refl Between Thmin & STh/L= 0.600 21  
Report

8 2 0, 0 4 0, 0 6 0, 0 8 0, 0 10 0, 0 3 1,  
0 5 1, 5 6 1, 0 7 1, 0 0 2, 8 0 2, 8 4 2,  
8 6 2, 8 8 2, 1 0 3, 1 1 3, 0 0 4, 0 2 4,  
8 4 4, 3 0 5, 1 1 5,

---

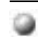

**Alert level G**

PLAT004\_ALERT\_5\_G Polymeric Structure Found with Maximum Dimension 2 Info  
PLAT007\_ALERT\_5\_G Number of Unrefined Donor-H Atoms ..... 2 Report  
H1 H2  
PLAT794\_ALERT\_5\_G Tentative Bond Valency for Pb1 (II) . 2.62 Info  
PLAT883\_ALERT\_1\_G No Info/Value for \_atom\_sites\_solution\_primary . Please Do !  
PLAT910\_ALERT\_3\_G Missing # of FCF Reflection(s) Below Theta(Min). 2 Note  
0 2 0, 0 1 1,  
PLAT912\_ALERT\_4\_G Missing # of FCF Reflections Above STh/L= 0.600 123 Note  
PLAT913\_ALERT\_3\_G Missing # of Very Strong Reflections in FCF .... 2 Note

0 6 0, 0 8 0,

PLAT933\_ALERT\_2\_G Number of HKL-OMIT Records in Embedded .res File 22 Note

0 0 2, 0 0 4, 0 1 1, 0 2 4, 0 3 1, 0 4 0,  
0 5 1, 0 7 1, 0 8 0, 0 10 0, 1 0 3, 1 1 3,  
1 1 5, 3 0 5, 3 0 10, 5 6 1, 8 0 2, 8 2 0,  
8 4 2, 8 4 4, 8 6 2, 8 8 2,

PLAT969\_ALERT\_5\_G The 'Henn et al.' R-Factor-gap value ..... 2.65 Note

Predicted wR2: Based on SigI\*\*2 2.47 or SHELX Weight 6.03

- 
- 0 **ALERT level A** = Most likely a serious problem - resolve or explain  
0 **ALERT level B** = A potentially serious problem, consider carefully  
4 **ALERT level C** = Check. Ensure it is not caused by an omission or oversight  
9 **ALERT level G** = General information/check it is not something unexpected  
1 ALERT type 1 CIF construction/syntax error, inconsistent or missing data  
2 ALERT type 2 Indicator that the structure model may be wrong or deficient  
5 ALERT type 3 Indicator that the structure quality may be low  
1 ALERT type 4 Improvement, methodology, query or suggestion  
4 ALERT type 5 Informative message, check
- 

## Datablock: triag2pbcl4\_iii\_280\_00

---

|                                 |                         |                                  |                         |
|---------------------------------|-------------------------|----------------------------------|-------------------------|
| Bond precision: N- C = 0.0072 A | Wavelength=0.71073      |                                  |                         |
| Cell:                           | a=7.4798(4)<br>alpha=90 | b=21.5667(13)<br>beta=90         | c=8.3086(4)<br>gamma=90 |
| Temperature:                    | 280 K                   |                                  |                         |
|                                 | 1340.30(13)             | 1340.30(13)                      |                         |
|                                 | P n m a                 | P n m a                          |                         |
|                                 | -P 2ac 2n               | -P 2ac 2n                        |                         |
| Moiety formula                  | Cl4 Pb, 2(C2 H4 N3)     | Cl2.286 Pb0.571, 1.143(C2 H4 N3) |                         |

|             |                 |                                    |
|-------------|-----------------|------------------------------------|
| Sum formula | C4 H8 Cl4 N6 Pb | C2.29 H4.57 Cl2.29 N3.43<br>Pb0.57 |
| Mr          | 489.16          | 279.52                             |
| Dx,g cm-3   | 2.424           | 2.424                              |
| Z           | 4               | 7                                  |
| Mu (mm-1)   | 13.364          | 13.364                             |
| F000        | 896.0           | 896.0                              |
| F000'       | 885.70          |                                    |
| h,k,lmax    | 10,29,11        | 10,28,11                           |
| Nref        | 1822            | 1662                               |
| Tmin,Tmax   | 0.088,0.201     | 0.057,0.248                        |
| Tmin'       | 0.001           |                                    |

Correction method= # Reported T Limits: Tmin=0.057 Tmax=0.248

AbsCorr = ANALYTICAL

Data completeness= 0.912

Theta(max)= 28.970

R(reflections)= 0.0244( 1339)

wR2(reflections)=

0.0575( 1662)

S = 1.133

Npar= 78

The following ALERTS were generated. Each ALERT has the format **test-name\_ALERT\_alert-type\_alert-level**. Click on the hyperlinks for more details of the test.

-  **Alert level C**
- PLAT029\_ALERT\_3\_C\_diffn\_measured\_fraction\_theta\_full value Low . 0.972 Why?
- PLAT042\_ALERT\_1\_C Calc. and Reported MoietyFormula Strings Differ Please Check  
Calc: Cl4 Pb, 2(C2 H4 N3)  
Rep.: Cl2.286 Pb0.571, 1.143(C2 H4 N3)
- PLAT242\_ALERT\_2\_C Low 'MainMol' Ueq as Compared to Neighbors of Pb1 Check
- PLAT245\_ALERT\_2\_C U(iso) H1A Smaller than U(eq) C1 by 0.013 Ang\*\*2
- PLAT906\_ALERT\_3\_C Large K Value in the Analysis of Variance ..... 3.200 Check

PLAT911\_ALERT\_3\_C Missing FCF Refl Between Thmin & STh/L= 0.600 33  
Report

4 3 0, 0 6 0, 0 8 0, 5 0 1, 5 2 1, 0 3 1,  
0 5 1, 5 6 1, 0 7 1, 5 8 1, 5 10 1, 5 14 1,  
0 0 2, 8 0 2, 8 2 2, 1 0 3, 1 1 3, 5 2 3,  
7 3 3, 5 4 3, 7 5 3, 5 6 3, 5 8 3, 5 10 3,  
5 12 3, 5 16 3, 0 0 4, 0 2 4, 1 1 5, 5 6 5,  
0 0 6, 5 2 7, 5 6 7,

---

● **Alert level G**

CELLZ01\_ALERT\_1\_G Difference between formula and atom\_site contents detected.

CELLZ01\_ALERT\_1\_G ALERT: check formula stoichiometry or atom site occupancies.

From the CIF: \_cell\_formula\_units\_Z 7

From the CIF: \_chemical\_formula\_sum C2.29 H4.57 Cl2.29 N3.43 Pb0.57  
TEST: Compare cell contents of formula and atom\_site data

|       | atom  | Z*formula | cif sites | diff  | C |
|-------|-------|-----------|-----------|-------|---|
| 16.03 | 16.00 | 0.03      |           |       |   |
|       | H     | 31.99     | 32.00     | -0.01 |   |
|       | Cl    | 16.03     | 16.00     | 0.03  |   |
|       | N     | 24.01     | 24.00     | 0.01  |   |
|       | Pb    | 3.99      | 4.00      | -0.01 |   |

PLAT004\_ALERT\_5\_G Polymeric Structure Found with Maximum Dimension 2 Info

PLAT007\_ALERT\_5\_G Number of Unrefined Donor-H Atoms ..... 2 Report

H1 H2

PLAT013\_ALERT\_1\_G N.O.K. \_shelx\_hkl\_checksum Found in CIF ..... Please Check

PLAT045\_ALERT\_1\_G Calculated and Reported Z Differ by a Factor ... 0.571 Check

PLAT794\_ALERT\_5\_G Tentative Bond Valency for Pb1 (II) . 2.60 Info

PLAT883\_ALERT\_1\_G No Info/Value for \_atom\_sites\_solution\_primary . Please Do !

PLAT910\_ALERT\_3\_G Missing # of FCF Reflection(s) Below Theta(Min). 1 Note

0 2 0,

PLAT912\_ALERT\_4\_G Missing # of FCF Reflections Above STh/L= 0.600 124 Note

PLAT913\_ALERT\_3\_G Missing # of Very Strong Reflections in FCF .... 2 Note

0 6 0, 0 8 0,

PLAT933\_ALERT\_2\_G Number of HKL-OMIT Records in Embedded .res File 32 Note

0 0 2, 0 0 4, 0 0 6, 0 2 4, 0 3 1, 0 5 1,

0 7 1, 0 8 0, 1 0 3, 1 1 3, 1 1 5, 4 3 0,

5 0 1, 5 2 1, 5 2 3, 5 2 7, 5 4 3, 5 6 1,

5 6 3, 5 6 5, 5 6 7, 5 8 1, 5 8 3, 5 10 1,

5 10 3, 5 12 3, 5 14 1, 5 16 3, 7 3 3, 7 5 3,

8 0 2, 8 2 2,

PLAT969\_ALERT\_5\_G The 'Henn et al.' R-Factor-gap value ..... 2.63 Note

Predicted wR2: Based on SigI\*\*2 2.19 or SHELX Weight 5.19

---

0 **ALERT level A** = Most likely a serious problem - resolve or explain

0 **ALERT level B** = A potentially serious problem, consider carefully

6 **ALERT level C** = Check. Ensure it is not caused by an omission or oversight

13 **ALERT level G** = General information/check it is not something unexpected

6 ALERT type 1 CIF construction/syntax error, inconsistent or missing data 3  
ALERT type 2 Indicator that the structure model may be wrong or deficient

5 ALERT type 3 Indicator that the structure quality may be low

1 ALERT type 4 Improvement, methodology, query or suggestion

4 ALERT type 5 Informative message, check

---

## Datablock: triag2pbcl4\_iv\_250\_00

---

Bond precision: N- C = 0.0111 A

Wavelength=0.71073

|                                                               |                     |                     |               |
|---------------------------------------------------------------|---------------------|---------------------|---------------|
| Cell:                                                         | a=21.4831(12)       | b=8.3057(3)         | c=7.4695(3)   |
|                                                               | alpha=90            | beta=90.036(4)      | gamma=90      |
| Temperature:                                                  | 250 K               |                     |               |
|                                                               | Calculated          | Reported            |               |
| Volume                                                        | 1332.80(10)         | 1332.80(10)         |               |
| Space group                                                   | P 21/c              | P 1 21/c 1          |               |
| Hall group                                                    | -P 2ybc             | -P 2ybc             |               |
| Moiety formula                                                | Cl4 Pb, 2(C2 H4 N3) | Cl4 Pb, 2(C2 H4 N3) |               |
| Sum formula                                                   | C4 H8 Cl4 N6 Pb     | C4 H8 Cl4 N6 Pb     |               |
| Mr                                                            | 489.16              | 489.15              |               |
| Dx,g cm-3                                                     | 2.438               | 2.438               |               |
| Z                                                             | 4                   | 4                   |               |
| Mu (mm-1)                                                     | 13.440              | 13.440              |               |
| F000                                                          | 896.0               | 896.0               |               |
| F000'                                                         | 885.70              |                     |               |
| h,k,lmax                                                      | 29,11,10            | 28,11,10            |               |
| Nref                                                          | 3553                | 3182                |               |
| Tmin,Tmax                                                     | 0.102,0.199         | 0.134,1.000         |               |
| Tmin'                                                         | 0.001               |                     |               |
| Correction method= # Reported T Limits: Tmin=0.134 Tmax=1.000 |                     |                     |               |
| AbsCorr = MULTI-SCAN                                          |                     |                     |               |
| Data completeness=                                            | 0.896               | Theta(max)=         | 29.030        |
| R(reflections)=                                               | 0.0354( 2395)       | wR2(reflections)=   |               |
| S =                                                           | 1.251               |                     | 0.0906( 3182) |
|                                                               | Npar=               | 138                 |               |

---

The following ALERTS were generated. Each ALERT has the format **test-name\_ALERT\_alert-type\_alert-level**. Click on the hyperlinks for more details of the test.

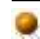

**Alert level B**

PLAT112\_ALERT\_2\_B ADDSYM Detects New (Pseudo) Symm. Elem n 100 %Fit

**Author Response: The symmetry has been thoroughly inspected by the presence of systemat**

PLAT112\_ALERT\_2\_B ADDSYM Detects New (Pseudo) Symm. Elem m 100 %Fit

**Author Response: The symmetry has been thoroughly inspected by the presence of systemat**

PLAT113\_ALERT\_2\_B ADDSYM Suggests Possible Pseudo/New Space Group Pnma Check

Check Model Parameter Symmetry for Reflection Data Support

**Author Response: look PLAT112**

PLAT934\_ALERT\_3\_B Number of (Iobs-Icalc)/Sigma(W) > 10 Outliers .. 5 Check  
8 0 0, 4 1 0, 1 2 0, 3 2 0, 5 2 0,

**Author Response: Some of the reflection with high errors were omitted**

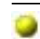

**Alert level C**

PLAT242\_ALERT\_2\_C Low 'MainMol' Ueq as Compared to Neighbors of Pb1 Check

PLAT906\_ALERT\_3\_C Large K Value in the Analysis of Variance ..... 22.355 Check

PLAT906\_ALERT\_3\_C Large K Value in the Analysis of Variance ..... 2.598 Check

PLAT971\_ALERT\_2\_C Check Calcd Resid. Dens. 0.78Ang From Pb1 1.98 eA-3

PLAT971\_ALERT\_2\_C Check Calcd Resid. Dens. 0.73Ang From Pb1 1.96 eA-3

PLAT972\_ALERT\_2\_C Check Calcd Resid. Dens. 1.02Ang From Pb1 -1.61 eA-3

PLAT972\_ALERT\_2\_C Check Calcd Resid. Dens. 0.97Ang From Pb1 -1.52 eA-3

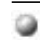

**Alert level G**

PLAT004\_ALERT\_5\_G Polymeric Structure Found with Maximum Dimension 2 Info



PLAT007\_ALERT\_5\_G Number of Unrefined Donor-H Atoms ..... 4 Report  
H1A H2A H1B H2B

PLAT012\_ALERT\_1\_G N.O.K. \_shelx\_res\_checksum Found in CIF ..... Please Check

PLAT013\_ALERT\_1\_G N.O.K. \_shelx\_hkl\_checksum Found in CIF ..... Please Check

PLAT720\_ALERT\_4\_G Number of Unusual/Non-Standard Labels ..... 4 Note  
H1AA H1BA H2AA H2BA

PLAT794\_ALERT\_5\_G Tentative Bond Valency for Pb1 (II) . 2.60 Info

PLAT802\_ALERT\_4\_G CIF Input Record(s) with more than 80 Characters 1 Info  
PLAT883\_ALERT\_1\_G No Info/Value for \_atom\_sites\_solution\_primary . Please Do !

PLAT910\_ALERT\_3\_G Missing # of FCF Reflection(s) Below Theta(Min). 2 Note  
1 0 0, 2 0 0,

PLAT912\_ALERT\_4\_G Missing # of FCF Reflections Above STh/L= 0.600 364 Note

PLAT913\_ALERT\_3\_G Missing # of Very Strong Reflections in FCF .... 1 Note  
6 0 0,

PLAT941\_ALERT\_3\_G Average HKL Measurement Multiplicity ..... 4.6 Low

PLAT969\_ALERT\_5\_G The 'Henn et al.' R-Factor-gap value ..... 2.64 Note  
Predicted wR2: Based on SigI\*\*2 3.43 or SHELX Weight 7.40

---

0 **ALERT level A** = Most likely a serious problem - resolve or explain

4 **ALERT level B** = A potentially serious problem, consider carefully

7 **ALERT level C** = Check. Ensure it is not caused by an omission or oversight

13 **ALERT level G** = General information/check it is not something unexpected

3 ALERT type 1 CIF construction/syntax error, inconsistent or missing data 8  
ALERT type 2 Indicator that the structure model may be wrong or deficient

6 ALERT type 3 Indicator that the structure quality may be low

3 ALERT type 4 Improvement, methodology, query or suggestion

4 ALERT type 5 Informative message, check

---

## Datablock: triag2pbcl4\_iv\_220\_00

---

Bond precision: N- C = 0.0105 Å

Wavelength=0.71073

Cell: a=21.4566(15) b=8.3029(3) c=7.4446(3)

alpha=90 beta=90.036(4) gamma=90

Temperature: 220 K

Calculated Reported

Volume 1326.27(12) 1326.27(12)

Space group P 21/c P 1 21/c 1

Hall group -P 2ybc -P 2ybc

Moiety formula Cl4 Pb, 2(C2 H4 N3) Cl4 Pb, 2(C2 H4 N3)

Sum formula C4 H8 Cl4 N6 Pb C4 H8 Cl4 N6 Pb

Mr 489.16 489.15

Dx,g cm-3 2.450 2.450

Z 4 4

Mu (mm-1) 13.506 13.506

F000 896.0 896.0

F000' 885.70

h,k,lmax 29,11,10 28,11,10

Nref 3538 3158

Tmin,Tmax 0.101,0.198 0.144,1.000

Tmin' 0.001

Correction method= # Reported T Limits: Tmin=0.144 Tmax=1.000

AbsCorr = MULTI-SCAN

Data completeness= 0.893

Theta(max)= 29.054

R(reflections)= 0.0402( 2441)

wR2(reflections)=

0.0931( 3145)

S = 1.110

Npar= 77

---

The following ALERTS were generated. Each ALERT has the format **test-name\_ALERT\_alert-type\_alert-level**. Click on the hyperlinks for more details of the test.

---

 **Alert level B**

PLAT112\_ALERT\_2\_B ADDSYM Detects New (Pseudo) Symm. Elem n 100 %Fit

**Author Response: The symmetry has been thoroughly inspected by the presence of systemat**

PLAT112\_ALERT\_2\_B ADDSYM Detects New (Pseudo) Symm. Elem m 100

%Fit **Author Response: The symmetry has been thoroughly inspected by the presence of systemat**

PLAT113\_ALERT\_2\_B ADDSYM Suggests Possible Pseudo/New Space Group Pnma  
Check

Check Model Parameter Symmetry for Reflection Data Support

**Author Response: look PLAT112**

PLAT972\_ALERT\_2\_B Check Calcd Resid. Dens. 0.88Ang From Pb1 -2.75 eA-3

**Author Response: Residual density near heavy atom.**

PLAT972\_ALERT\_2\_B Check Calcd Resid. Dens. 0.97Ang From Pb1 -2.71 eA-3

**Author Response: Residual density near heavy atom.**

---

 **Alert level C**

PLAT218\_ALERT\_3\_C Constrained U(ij) Components(s) for N2A . 6 Check

PLAT218\_ALERT\_3\_C Constrained U(ij) Components(s) for N1B . 6 Check

PLAT218\_ALERT\_3\_C Constrained U(ij) Components(s) for N1A . 6 Check

PLAT218\_ALERT\_3\_C Constrained U(ij) Components(s) for N2B . 6 Check

PLAT218\_ALERT\_3\_C Constrained U(ij) Components(s) for C1A . 6 Check  
 PLAT218\_ALERT\_3\_C Constrained U(ij) Components(s) for C1B . 6 Check  
 PLAT218\_ALERT\_3\_C Constrained U(ij) Components(s) for N3A . 6 Check  
 PLAT218\_ALERT\_3\_C Constrained U(ij) Components(s) for N3B . 6 Check  
 PLAT218\_ALERT\_3\_C Constrained U(ij) Components(s) for C2A . 6 Check  
 PLAT218\_ALERT\_3\_C Constrained U(ij) Components(s) for C2B . 6 Check  
 PLAT242\_ALERT\_2\_C Low 'MainMol' Ueq as Compared to Neighbors of Pb1 Check  
 PLAT906\_ALERT\_3\_C Large K Value in the Analysis of Variance ..... 31.137 Check  
 PLAT906\_ALERT\_3\_C Large K Value in the Analysis of Variance ..... 3.150 Check  
 PLAT911\_ALERT\_3\_C Missing FCF Refl Between Thmin & STh/L= 0.600 14  
 Report

0 2 0, 1 2 0, 3 0 0, 3 1 0, 3 2 0, 3 4 0,  
 4 1 0, 4 3 0, 5 1 0, 5 2 0, 6 0 0, 7 2 0,  
 8 0 0, 0 3 1,

PLAT971\_ALERT\_2\_C Check Calcd Resid. Dens. 0.94Ang From Pb1 1.87 eA-3  
 PLAT971\_ALERT\_2\_C Check Calcd Resid. Dens. 0.88Ang From Pb1 1.59 eA-3  
 PLAT971\_ALERT\_2\_C Check Calcd Resid. Dens. 0.91Ang From Pb1 1.57 eA-3  
 PLAT971\_ALERT\_2\_C Check Calcd Resid. Dens. 0.92Ang From Pb1 1.55 eA-3  
 PLAT992\_ALERT\_5\_C Repd & Actual \_reflns\_number\_gt Values Differ by 14 Check

---

**Alert level G**

PLAT002\_ALERT\_2\_G Number of Distance or Angle Restraints on AtSite 10 Note  
 PLAT004\_ALERT\_5\_G Polymeric Structure Found with Maximum Dimension 2 Info  
 PLAT007\_ALERT\_5\_G Number of Unrefined Donor-H Atoms ..... 4 Report  
 H1A H2A H1B H2B  
 PLAT012\_ALERT\_1\_G N.O.K. \_shelx\_res\_checksum Found in CIF ..... Please Check  
 PLAT013\_ALERT\_1\_G N.O.K. \_shelx\_hkl\_checksum Found in CIF ..... Please Check  
 PLAT176\_ALERT\_4\_G The CIF-Embedded .res File Contains SADI Records 5 Report

PLAT187\_ALERT\_4\_G The CIF-Embedded .res File Contains RIGU Records 3 Report

PLAT720\_ALERT\_4\_G Number of Unusual/Non-Standard Labels ..... 4 Note

H1AA H1BA H2AA H2BA

PLAT794\_ALERT\_5\_G Tentative Bond Valency for Pb1 (II) . 2.60 Info

PLAT802\_ALERT\_4\_G CIF Input Record(s) with more than 80 Characters 1 Info

PLAT860\_ALERT\_3\_G Number of Least-Squares Restraints ..... 61 Note

PLAT883\_ALERT\_1\_G No Info/Value for \_atom\_sites\_solution\_primary . Please Do !

PLAT910\_ALERT\_3\_G Missing # of FCF Reflection(s) Below Theta(Min). 2 Note

1 0 0, 2 0 0,

PLAT912\_ALERT\_4\_G Missing # of FCF Reflections Above STh/L= 0.600 374 Note

PLAT913\_ALERT\_3\_G Missing # of Very Strong Reflections in FCF .... 1 Note

6 0 0,

PLAT933\_ALERT\_2\_G Number of HKL-OMIT Records in Embedded .res File 13 Note

0 2 0, 0 3 1, 1 2 0, 3 0 0, 3 1 0, 3 2 0,

3 4 0, 4 1 0, 4 3 0, 5 1 0, 5 2 0, 7 2 0,

8 0 0,

PLAT941\_ALERT\_3\_G Average HKL Measurement Multiplicity ..... 4.6 Low

PLAT969\_ALERT\_5\_G The 'Henn et al.' R-Factor-gap value ..... 2.88 Note

Predicted wR2: Based on SigI\*\*2 3.23 or SHELX Weight 8.49

- 
- 0 **ALERT level A** = Most likely a serious problem - resolve or explain
- 5 **ALERT level B** = A potentially serious problem, consider carefully
- 19 **ALERT level C** = Check. Ensure it is not caused by an omission or oversight
- 18 **ALERT level G** = General information/check it is not something unexpected
- 3 ALERT type 1 CIF construction/syntax error, inconsistent or missing data
- 12 ALERT type 2 Indicator that the structure model may be wrong or deficient
- 17 ALERT type 3 Indicator that the structure quality may be low

5 ALERT type 4 Improvement, methodology, query or suggestion

5 ALERT type 5 Informative message, check

---

## Datablock: triag2pbcl4\_iv\_200\_00

---

|                                         |                           |                               |                         |
|-----------------------------------------|---------------------------|-------------------------------|-------------------------|
| Bond precision: N- N = 0.0120 A         |                           | Wavelength=0.71073            |                         |
| Cell:                                   | a=21.4424(18)<br>alpha=90 | b=8.2994(3)<br>beta=90.093(5) | c=7.4252(4)<br>gamma=90 |
| Temperature:                            | 200 K                     |                               |                         |
|                                         | Calculated                | Reported                      |                         |
| Volume                                  | 1321.38(14)               | 1321.38(14)                   |                         |
| Space group                             | P 21/c                    | P 1 21/c 1                    |                         |
| Hall group                              | -P 2ybc                   | -P 2ybc                       |                         |
| Moiety formula                          | C14 Pb, 2(C2 H4 N3)       | C14 Pb, 2(C2 H4 N3)           |                         |
| Sum formula                             | C4 H8 Cl4 N6 Pb           | C4 H8 Cl4 N6 Pb               |                         |
| Mr                                      | 489.16                    | 489.15                        |                         |
| Dx,g cm-3                               | 2.459                     | 2.459                         |                         |
| Z                                       | 4                         | 4                             |                         |
| Mu (mm-1)                               | 13.556                    | 13.556                        |                         |
| F000                                    | 896.0                     | 896.0                         |                         |
| F000'                                   | 885.70                    |                               |                         |
| h,k,lmax                                | 29,11,10                  | 28,11,10                      |                         |
| Nref                                    | 3486                      | 3145                          |                         |
| Tmin,Tmax                               | 0.100,0.197               | 0.160,1.000                   |                         |
| Tmin'                                   | 0.001                     |                               |                         |
| Correction method= # Reported T Limits: | Tmin=0.160 Tmax=1.000     |                               |                         |
| AbsCorr = MULTI-SCAN                    |                           |                               |                         |
| Data completeness= 0.902                |                           | Theta(max)= 28.920            |                         |

R(reflections)= 0.0419( 2470) wR2(reflections)=  
S = 1.155 Npar= 145 0.0980( 3127)

---

The following ALERTS were generated. Each ALERT has the format **test-name\_ALERT\_alert-type\_alert-level**. Click on the hyperlinks for more details of the test.

---

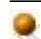

**Alert level B**

PLAT112\_ALERT\_2\_B ADDSYM Detects New (Pseudo) Symm. Elem n 100 %Fit

**Author Response: The symmetry has been thoroughly inspected by the presence of systemat**

PLAT112\_ALERT\_2\_B ADDSYM Detects New (Pseudo) Symm. Elem m 100 %Fit

**Author Response: The symmetry has been thoroughly inspected by the presence of systemat**

PLAT113\_ALERT\_2\_B ADDSYM Suggests Possible Pseudo/New Space Group Pnma  
Check

Check Model Parameter Symmetry for Reflection Data Support

**Author Response: The symmetry has been thoroughly inspected by the presence of systemat**

PLAT972\_ALERT\_2\_B Check Calcd Resid. Dens. 0.97Ang From Pb1 -3.30 eA-3

**Author Response: Residual density near heavy atom.**

PLAT972\_ALERT\_2\_B Check Calcd Resid. Dens. 0.98Ang From Pb1 -3.18 eA-3

**Author Response: Residual density near heavy atom.**

---

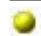

**Alert level C**

PLAT242\_ALERT\_2\_C Low 'MainMol' Ueq as Compared to Neighbors of Pb1 Check

PLAT906\_ALERT\_3\_C Large K Value in the Analysis of Variance ..... 41.139 Check

PLAT906\_ALERT\_3\_C Large K Value in the Analysis of Variance ..... 3.139 Check

PLAT911\_ALERT\_3\_C Missing FCF Refl Between Thmin & STh/L= 0.600 19  
Report

0 2 0, 0 4 0, 1 2 0, 3 0 0, 3 1 0, 3 2 0,  
3 4 0, 4 0 0, 4 1 0, 4 3 0, 5 1 0, 5 2 0,  
6 0 0, 8 0 0, 23 3 0, 24 0 0, 24 2 1, -4 0 2,  
22 1 2,

PLAT971\_ALERT\_2\_C Check Calcd Resid. Dens. 0.77Ang From Pb1 1.57 eA-3

PLAT992\_ALERT\_5\_C Reprd & Actual \_reflns\_number\_gt Values Differ by 17 Check

---

● **Alert level G**

PLAT002\_ALERT\_2\_G Number of Distance or Angle Restraints on AtSite 10 Note

PLAT004\_ALERT\_5\_G Polymeric Structure Found with Maximum Dimension 2 Info

PLAT007\_ALERT\_5\_G Number of Unrefined Donor-H Atoms ..... 2 Report

H1A H1B

PLAT012\_ALERT\_1\_G N.O.K. \_shelx\_res\_checksum Found in CIF ..... Please Check

PLAT013\_ALERT\_1\_G N.O.K. \_shelx\_hkl\_checksum Found in CIF ..... Please Check

PLAT083\_ALERT\_2\_G SHELXL Second Parameter in WGHT Unusually Large 5.19  
Why ?

PLAT176\_ALERT\_4\_G The CIF-Embedded .res File Contains SADI Records 5 Report

PLAT187\_ALERT\_4\_G The CIF-Embedded .res File Contains RIGU Records 3 Report

PLAT720\_ALERT\_4\_G Number of Unusual/Non-Standard Labels ..... 4 Note

H1AA H1BA H2AA H2BA

PLAT794\_ALERT\_5\_G Tentative Bond Valency for Pb1 (II) . 2.61 Info

PLAT802\_ALERT\_4\_G CIF Input Record(s) with more than 80 Characters 2 Info

PLAT860\_ALERT\_3\_G Number of Least-Squares Restraints ..... 61 Note

PLAT883\_ALERT\_1\_G No Info/Value for \_atom\_sites\_solution\_primary . Please Do !

PLAT910\_ALERT\_3\_G Missing # of FCF Reflection(s) Below Theta(Min). 2 Note

1 0 0, 2 0 0,

PLAT912\_ALERT\_4\_G Missing # of FCF Reflections Above STh/L= 0.600 337 Note



PLAT913\_ALERT\_3\_G Missing # of Very Strong Reflections in FCF .... 1 Note

6 0 0,

PLAT933\_ALERT\_2\_G Number of HKL-OMIT Records in Embedded .res File 18 Note

-4 0 2, 0 2 0, 0 4 0, 1 2 0, 3 0 0, 3 1 0,

3 2 0, 3 4 0, 4 0 0, 4 1 0, 4 3 0, 5 1 0,

5 2 0, 8 0 0, 22 1 2, 23 3 0, 24 0 0, 24 2 1,

PLAT941\_ALERT\_3\_G Average HKL Measurement Multiplicity ..... 4.6 Low

PLAT969\_ALERT\_5\_G The 'Henn et al.' R-Factor-gap value ..... 3.00 Note

Predicted wR2: Based on SigI\*\*2 3.26 or SHELX Weight 8.69

---

0 **ALERT level A** = Most likely a serious problem - resolve or explain

5 **ALERT level B** = A potentially serious problem, consider carefully

6 **ALERT level C** = Check. Ensure it is not caused by an omission or oversight

19 **ALERT level G** = General information/check it is not something unexpected

3 ALERT type 1 CIF construction/syntax error, inconsistent or missing data

10 ALERT type 2 Indicator that the structure model may be wrong or deficient

7 ALERT type 3 Indicator that the structure quality may be low

5 ALERT type 4 Improvement, methodology, query or suggestion

5 ALERT type 5 Informative message, check

---

## Datablock: triag2pbcl4\_iv\_180\_00

---

Bond precision: N- N = 0.0145 A

Wavelength=0.71073

Cell: a=21.4212(18)

b=8.2997(3)

c=7.4042(3)

alpha=90

beta=90.020(5)

gamma=90

Temperature: 180 K

Calculated

Reported

|                |                     |                     |
|----------------|---------------------|---------------------|
| Volume         | 1316.39(13)         | 1316.39(13)         |
| Space group    | P 21/c              | P 1 21/c 1          |
| Hall group     | -P 2ybc             | -P 2ybc             |
| Moiety formula | Cl4 Pb, 2(C2 H4 N3) | Cl4 Pb, 2(C2 H4 N3) |
| Sum formula    | C4 H8 Cl4 N6 Pb     | C4 H8 Cl4 N6 Pb     |
| Mr             | 489.16              | 489.15              |
| Dx,g cm-3      | 2.468               | 2.468               |
| Z              | 4                   | 4                   |
| Mu (mm-1)      | 13.607              | 13.607              |
| F000           | 896.0               | 896.0               |
| F000'          | 885.70              |                     |
| h,k,lmax       | 29,11,10            | 28,11,10            |
| Nref           | 3488                | 3117                |
| Tmin,Tmax      | 0.099,0.195         | 0.495,0.778         |
| Tmin'          | 0.001               |                     |

Correction method= # Reported T Limits: Tmin=0.495 Tmax=0.778

AbsCorr = ANALYTICAL

Data completeness= 0.894

Theta(max)= 28.972

R(reflections)= 0.0484( 2487)

wR2(reflections)=

0.1126( 3113)

S = 1.192

Npar= 137

The following ALERTS were generated. Each ALERT has the format **test-name\_ALERT\_alert-type\_alert-level**. Click on the hyperlinks for more details of the test.

---

 **Alert level A**

PLAT972\_ALERT\_2\_A Check Calcd Resid. Dens. 0.99Ang From Pb1 -4.38 eA-3

**Author Response: Residual density near heavy atom.**

---

PLAT972\_ALERT\_2\_A Check Calcd Resid. Dens. 0.97Ang From Pb1 -4.25 eA-3

**Author Response: Residual density near heavy atom.**

---

 **Alert level B**

PLAT112\_ALERT\_2\_B ADDSYM Detects New (Pseudo) Symm. Elem n 100 %Fit

**Author Response: The symmetry has been thoroughly inspected by the presence of the syst**

PLAT112\_ALERT\_2\_B ADDSYM Detects New (Pseudo) Symm. Elem m 100 %Fit

**Author Response: The symmetry has been thoroughly inspected by the presence of the syst**

PLAT113\_ALERT\_2\_B ADDSYM Suggests Possible Pseudo/New Space Group Pnma  
Check

Check Model Parameter Symmetry for Reflection Data Support

**Author Response: look PLAT112**

---

 **Alert level C**

PLAT213\_ALERT\_2\_C Atom C11 has ADP max/min Ratio ..... 3.1 prolat

PLAT213\_ALERT\_2\_C Atom C12 has ADP max/min Ratio ..... 3.1 prolat

PLAT242\_ALERT\_2\_C Low 'MainMol' Ueq as Compared to Neighbors of Pb1 Check

PLAT906\_ALERT\_3\_C Large K Value in the Analysis of Variance ..... 53.385 Check

PLAT906\_ALERT\_3\_C Large K Value in the Analysis of Variance ..... 3.403 Check

PLAT911\_ALERT\_3\_C Missing FCF Refl Between Thmin & STh/L= 0.600 21  
Report

0 2 0, 0 4 0, 1 2 0, 3 0 0, 3 2 0, 3 4 0,  
4 0 0, 4 1 0, 5 0 0, 6 0 0, 23 0 0, 23 1 0,  
23 3 0, -24 2 1, 22 2 1, 22 4 1, 24 2 1, -23 2 2,  
-22 1 2, 22 3 2, -22 2 3,

PLAT971\_ALERT\_2\_C Check Calcd Resid. Dens. 0.81Ang From Pb1 1.67 eA-3

---

**Alert level G**

|                                                   |                                                  |       |              |
|---------------------------------------------------|--------------------------------------------------|-------|--------------|
| PLAT002_ALERT_2_G                                 | Number of Distance or Angle Restraints on AtSite | 10    | Note         |
| PLAT004_ALERT_5_G                                 | Polymeric Structure Found with Maximum Dimension | 2     | Info         |
| PLAT007_ALERT_5_G                                 | Number of Unrefined Donor-H Atoms .....          | 4     | Report       |
| H1A H2A H1B H2B                                   |                                                  |       |              |
| PLAT012_ALERT_1_G                                 | N.O.K. _shelx_res_checksum Found in CIF .....    |       | Please Check |
| PLAT013_ALERT_1_G                                 | N.O.K. _shelx_hkl_checksum Found in CIF .....    |       | Please Check |
| PLAT083_ALERT_2_G                                 | SHELXL Second Parameter in WGHT Unusually Large  | 11.72 | Why ?        |
| PLAT176_ALERT_4_G                                 | The CIF-Embedded .res File Contains SADI Records | 5     | Report       |
| PLAT187_ALERT_4_G                                 | The CIF-Embedded .res File Contains RIGU Records | 3     | Report       |
| PLAT720_ALERT_4_G                                 | Number of Unusual/Non-Standard Labels .....      | 4     | Note         |
| H1AA H1BA H2AA H2BA                               |                                                  |       |              |
| PLAT794_ALERT_5_G                                 | Tentative Bond Valency for Pb1 (II) .            | 2.61  | Info         |
| PLAT802_ALERT_4_G                                 | CIF Input Record(s) with more than 80 Characters | 1     | Info         |
| PLAT860_ALERT_3_G                                 | Number of Least-Squares Restraints .....         | 61    | Note         |
| PLAT883_ALERT_1_G                                 | No Info/Value for _atom_sites_solution_primary . |       | Please Do !  |
| PLAT910_ALERT_3_G                                 | Missing # of FCF Reflection(s) Below Theta(Min). | 2     | Note         |
| 1 0 0, 2 0 0,                                     |                                                  |       |              |
| PLAT912_ALERT_4_G                                 | Missing # of FCF Reflections Above STh/L= 0.600  | 350   | Note         |
| PLAT913_ALERT_3_G                                 | Missing # of Very Strong Reflections in FCF .... | 1     | Note         |
| 6 0 0,                                            |                                                  |       |              |
| PLAT933_ALERT_2_G                                 | Number of HKL-OMIT Records in Embedded .res File | 20    | Note         |
| -24 2 1, -23 2 2, -22 1 2, -22 2 3, 0 2 0, 0 4 0, |                                                  |       |              |
| 1 2 0, 3 0 0, 3 2 0, 3 4 0, 4 0 0, 4 1 0,         |                                                  |       |              |
| 5 0 0, 22 2 1, 22 3 2, 22 4 1, 23 1 0, 23 3 0,    |                                                  |       |              |
| 24 2 1, 25 3 0,                                   |                                                  |       |              |
| PLAT941_ALERT_3_G                                 | Average HKL Measurement Multiplicity .....       | 4.6   | Low          |

PLAT969\_ALERT\_5\_G The 'Henn et al.' R-Factor-gap value ..... 3.68 Note

Predicted wR2: Based on SigI\*\*2 3.05 or SHELX Weight 9.66

PLAT992\_ALERT\_5\_G Repld & Actual \_reflns\_number\_gt Values Differ by 4 Check

---

2 **ALERT level A** = Most likely a serious problem - resolve or explain

3 **ALERT level B** = A potentially serious problem, consider carefully

7 **ALERT level C** = Check. Ensure it is not caused by an omission or oversight

20 **ALERT level G** = General information/check it is not something unexpected

3 ALERT type 1 CIF construction/syntax error, inconsistent or missing data 12  
ALERT type 2 Indicator that the structure model may be wrong or deficient

7 ALERT type 3 Indicator that the structure quality may be low 5  
ALERT type 4 Improvement, methodology, query or suggestion

5 ALERT type 5 Informative message, check

---

## Datablock: triag2pbcl4\_iv\_150\_00

---

Bond precision: N- C = 0.0159 A

Wavelength=0.71073

|       |             |                |             |
|-------|-------------|----------------|-------------|
| Cell: | a=21.429(2) | b=8.3075(4)    | c=7.3768(4) |
|       | alpha=90    | beta=90.111(6) | gamma=90    |

Temperature: 150 K

| Calculated | Reported |
|------------|----------|
|------------|----------|

|        |             |             |
|--------|-------------|-------------|
| Volume | 1313.23(16) | 1313.21(17) |
|--------|-------------|-------------|

|             |        |            |
|-------------|--------|------------|
| Space group | P 21/c | P 1 21/c 1 |
|-------------|--------|------------|

|            |         |         |
|------------|---------|---------|
| Hall group | -P 2ybc | -P 2ybc |
|------------|---------|---------|

|                |                     |                     |
|----------------|---------------------|---------------------|
| Moiety formula | C14 Pb, 2(C2 H4 N3) | C14 Pb, 2(C2 H4 N3) |
|----------------|---------------------|---------------------|

|             |                 |                 |
|-------------|-----------------|-----------------|
| Sum formula | C4 H8 Cl4 N6 Pb | C4 H8 Cl4 N6 Pb |
|-------------|-----------------|-----------------|

|    |        |        |
|----|--------|--------|
| Mr | 489.16 | 489.15 |
|----|--------|--------|

|           |       |       |
|-----------|-------|-------|
| Dx,g cm-3 | 2.474 | 2.474 |
|-----------|-------|-------|

|   |   |   |
|---|---|---|
| Z | 4 | 4 |
|---|---|---|

|           |             |             |
|-----------|-------------|-------------|
| Mu (mm-1) | 13.640      | 13.640      |
| F000      | 896.0       | 896.0       |
| F000'     | 885.70      |             |
| h,k,lmax  | 29,11,10    | 28,11,9     |
| Nref      | 3477        | 3100        |
| Tmin,Tmax | 0.099,0.195 | 0.493,0.777 |
| Tmin'     | 0.001       |             |

Correction method= # Reported T Limits: Tmin=0.493 Tmax=0.777

AbsCorr = ANALYTICAL

Data completeness= 0.892

Theta(max)= 28.984

R(reflections)= 0.0561( 2518)

wR2(reflections)=

0.1259( 3100)

S = 1.231

Npar= 137

The following ALERTS were generated. Each ALERT has the format **test-name\_ALERT\_alert-type\_alert-level**. Click on the hyperlinks for more details of the test.

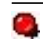

**Alert level A**

PLAT972\_ALERT\_2\_A Check Calcd Resid. Dens. 1.01Ang From Pb1 -5.24 eA-3

**Author Response: Residual density near heavy atom.**

PLAT972\_ALERT\_2\_A Check Calcd Resid. Dens. 1.02Ang From Pb1 -5.22 eA-3

**Author Response: Residual density near heavy atom.**

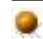

**Alert level B**

PLAT112\_ALERT\_2\_B ADDSYM Detects New (Pseudo) Symm. Elem n 100 %Fit

**Author Response: The symmetry has been thoroughly inspected by the presence of the syst**

PLAT112\_ALERT\_2\_B ADDSYM Detects New (Pseudo) Symm. Elem m 100 %Fit

**Author Response: The symmetry has been thoroughly inspected by the presence of the syst**

PLAT113\_ALERT\_2\_B ADDSYM Suggests Possible Pseudo/New Space Group Pnma  
Check

Check Model Parameter Symmetry for Reflection Data Support

**Author Response: look PLAT112**

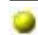

**Alert level C**

PLAT213\_ALERT\_2\_C Atom Pb1 has ADP max/min Ratio ..... 3.1 prolat  
PLAT213\_ALERT\_2\_C Atom Cl1 has ADP max/min Ratio ..... 3.2 prolat  
PLAT213\_ALERT\_2\_C Atom Cl2 has ADP max/min Ratio ..... 3.1 prolat  
PLAT242\_ALERT\_2\_C Low 'MainMol' Ueq as Compared to Neighbors of Pb1 Check  
PLAT906\_ALERT\_3\_C Large K Value in the Analysis of Variance ..... 61.884 Check  
PLAT906\_ALERT\_3\_C Large K Value in the Analysis of Variance ..... 4.224 Check  
PLAT911\_ALERT\_3\_C Missing FCF Refl Between Thmin & STh/L= 0.600 15  
Report  
0 2 0, 0 4 0, 1 2 0, 4 1 0, 5 0 0, 6 0 0,  
8 0 0, 21 0 0, 22 0 0, 23 0 0, 23 3 0, -24 2 1,  
24 2 1, 22 1 2, -22 2 3,  
PLAT971\_ALERT\_2\_C Check Calcd Resid. Dens. 0.79Ang From Pb1 1.63 eA-3  
PLAT971\_ALERT\_2\_C Check Calcd Resid. Dens. 0.82Ang From Pb1 1.57 eA-3  
PLAT971\_ALERT\_2\_C Check Calcd Resid. Dens. 1.06Ang From Pb1 1.52 eA-3  
PLAT972\_ALERT\_2\_C Check Calcd Resid. Dens. 0.94Ang From Cl4 -1.52 eA-3

**Author Response: Residual density near heavy atom.**

---

**Alert level G**

PLAT002\_ALERT\_2\_G Number of Distance or Angle Restraints on AtSite 10 Note

PLAT003\_ALERT\_2\_G Number of Uiso or Uij Restrained non-H Atoms ... 15 Report

PLAT004\_ALERT\_5\_G Polymeric Structure Found with Maximum Dimension 2 Info

PLAT007\_ALERT\_5\_G Number of Unrefined Donor-H Atoms ..... 4 Report

H1A H2A H1B H2B

PLAT012\_ALERT\_1\_G N.O.K. \_shelx\_res\_checksum Found in CIF ..... Please Check

PLAT013\_ALERT\_1\_G N.O.K. \_shelx\_hkl\_checksum Found in CIF ..... Please Check

PLAT083\_ALERT\_2\_G SHELXL Second Parameter in WGHT Unusually Large 19.02  
Why ?

PLAT176\_ALERT\_4\_G The CIF-Embedded .res File Contains SADI Records 5 Report

PLAT186\_ALERT\_4\_G The CIF-Embedded .res File Contains ISOR Records 3 Report

PLAT187\_ALERT\_4\_G The CIF-Embedded .res File Contains RIGU Records 3 Report

PLAT720\_ALERT\_4\_G Number of Unusual/Non-Standard Labels ..... 4 Note

H1AA H1BA H2AA H2BA

PLAT794\_ALERT\_5\_G Tentative Bond Valency for Pb1 (II) . 2.61 Info

PLAT802\_ALERT\_4\_G CIF Input Record(s) with more than 80 Characters 1 Info

PLAT860\_ALERT\_3\_G Number of Least-Squares Restraints ..... 151 Note

PLAT883\_ALERT\_1\_G No Info/Value for \_atom\_sites\_solution\_primary . Please Do !

PLAT910\_ALERT\_3\_G Missing # of FCF Reflection(s) Below Theta(Min). 2 Note

1 0 0, 2 0 0,

PLAT912\_ALERT\_4\_G Missing # of FCF Reflections Above STh/L= 0.600 348 Note

PLAT913\_ALERT\_3\_G Missing # of Very Strong Reflections in FCF .... 1 Note

6 0 0,

PLAT933\_ALERT\_2\_G Number of HKL-OMIT Records in Embedded .res File 15 Note

-24 2 1, -24 5 2, -22 2 3, 0 2 0, 0 4 0, 1 2 0,  
4 1 0, 5 0 0, 8 0 0, 22 0 0, 22 1 2, 23 3 0,  
23 5 2, 24 2 1, 25 3 0,



PLAT941\_ALERT\_3\_G Average HKL Measurement Multiplicity ..... 4.6 Low  
 PLAT969\_ALERT\_5\_G The 'Henn et al.' R-Factor-gap value ..... 4.11 Note  
 Predicted wR2: Based on SigI\*\*2 3.05 or SHELX Weight 10.47

- 
- 2 **ALERT level A** = Most likely a serious problem - resolve or explain  
 3 **ALERT level B** = A potentially serious problem, consider carefully  
 11 **ALERT level C** = Check. Ensure it is not caused by an omission or oversight  
 21 **ALERT level G** = General information/check it is not something unexpected
- 3 ALERT type 1 CIF construction/syntax error, inconsistent or missing data  
 17 ALERT type 2 Indicator that the structure model may be wrong or deficient  
 7 ALERT type 3 Indicator that the structure quality may be low  
 6 ALERT type 4 Improvement, methodology, query or suggestion  
 4 ALERT type 5 Informative message, check
- 

## Datablock: triag2pbcl4\_iv\_130\_00

---

|                                 |                         |                                                          |
|---------------------------------|-------------------------|----------------------------------------------------------|
| Bond precision: N- C = 0.0166 A |                         | Wavelength=0.71073                                       |
| Cell:                           | a=21.423(2)<br>alpha=90 | b=8.3075(4)<br>beta=90.112(6)<br>c=7.3587(4)<br>gamma=90 |
| Temperature:                    | 130 K                   |                                                          |
|                                 | Calculated              | Reported                                                 |
| Volume                          | 1309.64(15)             | 1309.63(16)                                              |
| Space group                     | P 21/c                  | P 1 21/c 1                                               |
| Hall group                      | -P 2ybc                 | -P 2ybc                                                  |
| Moiety formula                  | Cl4 Pb, 2(C2 H4 N3)     | Cl4 Pb, 2(C2 H4 N3)                                      |
| Sum formula                     | C4 H8 Cl4 N6 Pb         | C4 H8 Cl4 N6 Pb                                          |
| Mr                              | 489.16                  | 489.15                                                   |
| Dx,g cm-3                       | 2.481                   | 2.481                                                    |

|           |             |             |
|-----------|-------------|-------------|
| Z         | 4           | 4           |
| Mu (mm-1) | 13.677      | 13.677      |
| F000      | 896.0       | 896.0       |
| F000'     | 885.70      |             |
| h,k,lmax  | 29,11,10    | 28,11,9     |
| Nref      | 3474        | 3091        |
| Tmin,Tmax | 0.098,0.194 | 0.492,0.777 |
| Tmin'     | 0.001       |             |

Correction method= # Reported T Limits: Tmin=0.492 Tmax=0.777

AbsCorr = ANALYTICAL

Data completeness= 0.890

Theta(max)= 29.014

R(reflections)= 0.0597( 2529)

wR2(reflections)=

0.1267( 3091)

S = 1.255

Npar= 137

The following ALERTS were generated. Each ALERT has the format **test-name\_ALERT\_alert-type\_alert-level**. Click on the hyperlinks for more details of the test.

 **Alert level A**

PLAT972\_ALERT\_2\_A Check Calcd Resid. Dens. 1.03Ang From Pb1 -5.31 eA-3

**Author Response: Residual density near heavy atom.**

PLAT972\_ALERT\_2\_A Check Calcd Resid. Dens. 1.03Ang From Pb1 -5.21 eA-3

**Author Response: Residual density near heavy atom.**

 **Alert level B**

PLAT112\_ALERT\_2\_B ADDSYM Detects New (Pseudo) Symm. Elem n 100 %Fit

**Author Response: The symmetry has been thoroughly inspected by the presence of the syst**

PLAT112\_ALERT\_2\_B ADDSYM Detects New (Pseudo) Symm. Elem m 100 %Fit

**Author Response: The symmetry has been thoroughly inspected by the presence of the syst**

PLAT113\_ALERT\_2\_B ADDSYM Suggests Possible Pseudo/New Space Group Pnma  
Check

Check Model Parameter Symmetry for Reflection Data Support

**Author Response: look PLAT112**



**Alert level C**

PLAT213\_ALERT\_2\_C Atom Pb1 has ADP max/min Ratio ..... 3.3 prolat  
PLAT213\_ALERT\_2\_C Atom C11 has ADP max/min Ratio ..... 3.5 prolat  
PLAT213\_ALERT\_2\_C Atom C12 has ADP max/min Ratio ..... 3.3 prolat  
PLAT242\_ALERT\_2\_C Low 'MainMol' Ueq as Compared to Neighbors of Pb1 Check  
PLAT906\_ALERT\_3\_C Large K Value in the Analysis of Variance ..... 65.803 Check  
PLAT906\_ALERT\_3\_C Large K Value in the Analysis of Variance ..... 5.351 Check  
PLAT911\_ALERT\_3\_C Missing FCF Refl Between Thmin & STh/L= 0.600 17  
Report

0 2 0, 0 4 0, 1 2 0, 4 0 0, 4 1 0, 5 0 0,  
6 0 0, 8 0 0, 23 3 0, -22 2 1, 22 4 1, 24 2 1,  
21 2 2, 22 1 2, 22 3 2, -21 2 3, -21 1 4,

PLAT971\_ALERT\_2\_C Check Calcd Resid. Dens. 0.79Ang From Pb1 1.68 eA-3  
PLAT971\_ALERT\_2\_C Check Calcd Resid. Dens. 0.79Ang From Pb1 1.63 eA-3

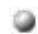

**Alert level G**

PLAT002\_ALERT\_2\_G Number of Distance or Angle Restraints on AtSite 10 Note  
PLAT003\_ALERT\_2\_G Number of Uiso or Uij Restrained non-H Atoms ... 15 Report  
PLAT004\_ALERT\_5\_G Polymeric Structure Found with Maximum Dimension 2 Info  
PLAT007\_ALERT\_5\_G Number of Unrefined Donor-H Atoms ..... 4 Report

H1A H2A H1B H2B

PLAT013\_ALERT\_1\_G N.O.K. \_shelx\_hkl\_checksum Found in CIF ..... Please Check  
PLAT083\_ALERT\_2\_G SHELXL Second Parameter in WGHT Unusually Large 21.06  
Why ?

PLAT176\_ALERT\_4\_G The CIF-Embedded .res File Contains SADI Records 5 Report

PLAT186\_ALERT\_4\_G The CIF-Embedded .res File Contains ISOR Records 3 Report

PLAT187\_ALERT\_4\_G The CIF-Embedded .res File Contains RIGU Records 3 Report

PLAT720\_ALERT\_4\_G Number of Unusual/Non-Standard Labels ..... 4 Note

H1AA H1BA H2AA H2BA

PLAT794\_ALERT\_5\_G Tentative Bond Valency for Pb1 (II) . 2.61 Info

PLAT802\_ALERT\_4\_G CIF Input Record(s) with more than 80 Characters 1 Info

PLAT860\_ALERT\_3\_G Number of Least-Squares Restraints ..... 151 Note

PLAT883\_ALERT\_1\_G No Info/Value for \_atom\_sites\_solution\_primary . Please Do !

PLAT910\_ALERT\_3\_G Missing # of FCF Reflection(s) Below Theta(Min). 2 Note

1 0 0, 2 0 0,

PLAT912\_ALERT\_4\_G Missing # of FCF Reflections Above STh/L= 0.600 356 Note

PLAT913\_ALERT\_3\_G Missing # of Very Strong Reflections in FCF .... 1 Note

6 0 0,

PLAT933\_ALERT\_2\_G Number of HKL-OMIT Records in Embedded .res File 19 Note

-22 2 1, -21 1 4, 0 2 0, 0 4 0, 1 2 0, 4 0 0,

4 1 0, 5 0 0, 8 0 0, 21 2 2, 22 1 2, 22 3 2,

22 4 1, 23 3 0, 23 5 2, 24 2 1, 25 3 0, 25 4 1,

28 2 1,

PLAT941\_ALERT\_3\_G Average HKL Measurement Multiplicity ..... 4.6 Low

PLAT969\_ALERT\_5\_G The 'Henn et al.' R-Factor-gap value ..... 4.37 Note

Predicted wR2: Based on SigI\*\*2 2.89 or SHELX Weight 10.33

---

2 **ALERT level A** = Most likely a serious problem - resolve or explain

- 3 **ALERT level B** = A potentially serious problem, consider carefully  
 9 **ALERT level C** = Check. Ensure it is not caused by an omission or oversight  
 20 **ALERT level G** = General information/check it is not something unexpected  
 2 ALERT type 1 CIF construction/syntax error, inconsistent or missing data  
 15 ALERT type 2 Indicator that the structure model may be wrong or deficient  
 7 ALERT type 3 Indicator that the structure quality may be low  
 6 ALERT type 4 Improvement, methodology, query or suggestion  
 4 ALERT type 5 Informative message, check

## Datablock: triag2pbcl4\_iv\_100\_00

|                                 |                     |                              |
|---------------------------------|---------------------|------------------------------|
| Bond precision: N- N = 0.0175 A |                     | Wavelength=0.71073           |
| Cell:                           | a=21.419(2)         | b=8.3049(4)      c=7.3363(4) |
|                                 | alpha=90            | beta=90.149(6)      gamma=90 |
| Temperature:                    | 100 K               |                              |
|                                 | Calculated          | Reported                     |
| Volume                          | 1305.00(15)         | 1305.01(16)                  |
| Space group                     | P 21/c              | P 1 21/c 1                   |
| Hall group                      | -P 2ybc             | -P 2ybc                      |
| Moiety formula                  | Cl4 Pb, 2(C2 H4 N3) | Cl4 Pb, 2(C2 H4 N3)          |
| Sum formula                     | C4 H8 Cl4 N6 Pb     | C4 H8 Cl4 N6 Pb              |
| Mr                              | 489.16              | 489.15                       |
| Dx,g cm-3                       | 2.490               | 2.490                        |
| Z                               | 4                   | 4                            |
| Mu (mm-1)                       | 13.726              | 13.726                       |
| F000                            | 896.0               | 896.0                        |
| F000'                           | 885.70              |                              |



PLAT113\_ALERT\_2\_B ADDSYM Suggests Possible Pseudo/New Space Group Pnma  
 Check Check Model Parameter Symmetry for Reflection Data Support

**Author Response: look PLAT112**

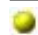

**Alert level C**

PLAT213\_ALERT\_2\_C Atom Pb1 has ADP max/min Ratio ..... 3.8 prolat  
 PLAT213\_ALERT\_2\_C Atom C11 has ADP max/min Ratio ..... 3.8 prolat  
 PLAT213\_ALERT\_2\_C Atom C12 has ADP max/min Ratio ..... 3.6 prolat  
 PLAT906\_ALERT\_3\_C Large K Value in the Analysis of Variance ..... 74.682 Check  
 PLAT906\_ALERT\_3\_C Large K Value in the Analysis of Variance ..... 5.786 Check  
 PLAT911\_ALERT\_3\_C Missing FCF Refl Between Thmin & STh/L= 0.600 18  
 Report

0 2 0, 0 4 0, 1 2 0, 6 0 0, 8 0 0, -23 4 1,  
 -22 2 1, -21 4 1, 22 2 1, 24 2 1, -23 1 2, -22 3 2,  
 -1 0 2, -1 2 2, 1 0 2, 22 1 2, 22 3 2, -22 1 3,

PLAT971\_ALERT\_2\_C Check Calcd Resid. Dens. 0.64Ang From Pb1 1.95 eA-3  
 PLAT971\_ALERT\_2\_C Check Calcd Resid. Dens. 0.64Ang From Pb1 1.61 eA-3  
 PLAT971\_ALERT\_2\_C Check Calcd Resid. Dens. 0.59Ang From Pb1 1.61 eA-3

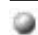

**Alert level G**

PLAT002\_ALERT\_2\_G Number of Distance or Angle Restraints on AtSite 10 Note  
 PLAT003\_ALERT\_2\_G Number of Uiso or Uij Restrained non-H Atoms ... 15 Report  
 PLAT004\_ALERT\_5\_G Polymeric Structure Found with Maximum Dimension 2 Info  
 PLAT007\_ALERT\_5\_G Number of Unrefined Donor-H Atoms ..... 4 Report

H1A H2A H1B H2B

PLAT012\_ALERT\_1\_G N.O.K. \_shelx\_res\_checksum Found in CIF ..... Please Check  
 PLAT013\_ALERT\_1\_G N.O.K. \_shelx\_hkl\_checksum Found in CIF ..... Please Check  
 PLAT083\_ALERT\_2\_G SHELXL Second Parameter in WGHT Unusually Large 28.79  
 Why ?

PLAT176\_ALERT\_4\_G The CIF-Embedded .res File Contains SADI Records 5 Report  
 PLAT186\_ALERT\_4\_G The CIF-Embedded .res File Contains ISOR Records 3 Report  
 PLAT187\_ALERT\_4\_G The CIF-Embedded .res File Contains RIGU Records 3 Report  
 PLAT232\_ALERT\_2\_G Hirshfeld Test Diff (M-X) Pb1 --Cl3 . 8.0 s.u.  
 PLAT232\_ALERT\_2\_G Hirshfeld Test Diff (M-X) Pb1 --Cl4 . 6.5 s.u.  
 PLAT720\_ALERT\_4\_G Number of Unusual/Non-Standard Labels ..... 4 Note  
     H1AA H1BA H2AA H2BA  
 PLAT794\_ALERT\_5\_G Tentative Bond Valency for Pb1 (II) . 2.61 Info  
 PLAT802\_ALERT\_4\_G CIF Input Record(s) with more than 80 Characters 1 Info  
 PLAT860\_ALERT\_3\_G Number of Least-Squares Restraints ..... 151 Note  
 PLAT883\_ALERT\_1\_G No Info/Value for \_atom\_sites\_solution\_primary . Please Do !  
 PLAT910\_ALERT\_3\_G Missing # of FCF Reflection(s) Below Theta(Min). 2 Note  
     1 0 0, 2 0 0,  
 PLAT912\_ALERT\_4\_G Missing # of FCF Reflections Above STh/L= 0.600 294 Note  
 PLAT913\_ALERT\_3\_G Missing # of Very Strong Reflections in FCF .... 2 Note  
     6 0 0, -1 2 2,  
 PLAT933\_ALERT\_2\_G Number of HKL-OMIT Records in Embedded .res File 26 Note  
     -24 3 2, -24 4 1, -24 5 2, -23 1 2, -23 1 4, -23 4 1,  
     -22 1 3, -22 2 1, -22 3 2, -22 4 3, -22 5 2, -21 4 1,  
     0 2 0, 0 4 0, 1 2 0, 8 0 0, 22 1 2, 22 2 1,  
     22 3 2, 23 5 2, 24 2 1, 24 3 2, 25 1 2, 25 3 0,  
     25 4 1, 27 3 0,  
 PLAT941\_ALERT\_3\_G Average HKL Measurement Multiplicity ..... 4.6 Low  
 PLAT969\_ALERT\_5\_G The 'Henn et al.' R-Factor-gap value ..... 4.51 Note  
     Predicted wR2: Based on SigI\*\*2 2.87 or SHELX Weight 10.71

---

2 **ALERT level A** = Most likely a serious problem - resolve or explain  
 3 **ALERT level B** = A potentially serious problem, consider carefully



- 9 **ALERT level C** = Check. Ensure it is not caused by an omission or oversight
- 23 **ALERT level G** = General information/check it is not something unexpected
- 3 ALERT type 1 CIF construction/syntax error, inconsistent or missing data
- 17 ALERT type 2 Indicator that the structure model may be wrong or deficient
- 7 ALERT type 3 Indicator that the structure quality may be low 6
- ALERT type 4 Improvement, methodology, query or suggestion
- 4 ALERT type 5 Informative message, check
- 

It is advisable to attempt to resolve as many as possible of the alerts in all categories. Often the minor alerts point to easily fixed oversights, errors and omissions in your CIF or refinement strategy, so attention to these fine details can be worthwhile. In order to resolve some of the more serious problems it may be necessary to carry out additional measurements or structure refinements. However, the purpose of your study may justify the reported deviations and the more serious of these should normally be commented upon in the discussion or experimental section of a paper or in the "special\_details" fields of the CIF. checkCIF was carefully designed to identify outliers and unusual parameters, but every test has its limitations and alerts that are not important in a particular case may appear. Conversely, the absence of alerts does not guarantee there are no aspects of the results needing attention. It is up to the individual to critically assess their own results and, if necessary, seek expert advice.

#### **Publication of your CIF in IUCr journals**

A basic structural check has been run on your CIF. These basic checks will be run on all CIFs submitted for publication in IUCr journals (*Acta Crystallographica*, *Journal of Applied Crystallography*, *Journal of Synchrotron Radiation*); however, if you intend to submit to *Acta Crystallographica Section C* or *E* or *IUCrData*, you should make sure that full publication checks are run on the final version of your CIF prior to submission.

#### **Publication of your CIF in other journals**

Please refer to the *Notes for Authors* of the relevant journal for any special instructions relating to CIF submission.

---

**PLATON version of 06/01/2024; check.def file version of 05/01/2024**

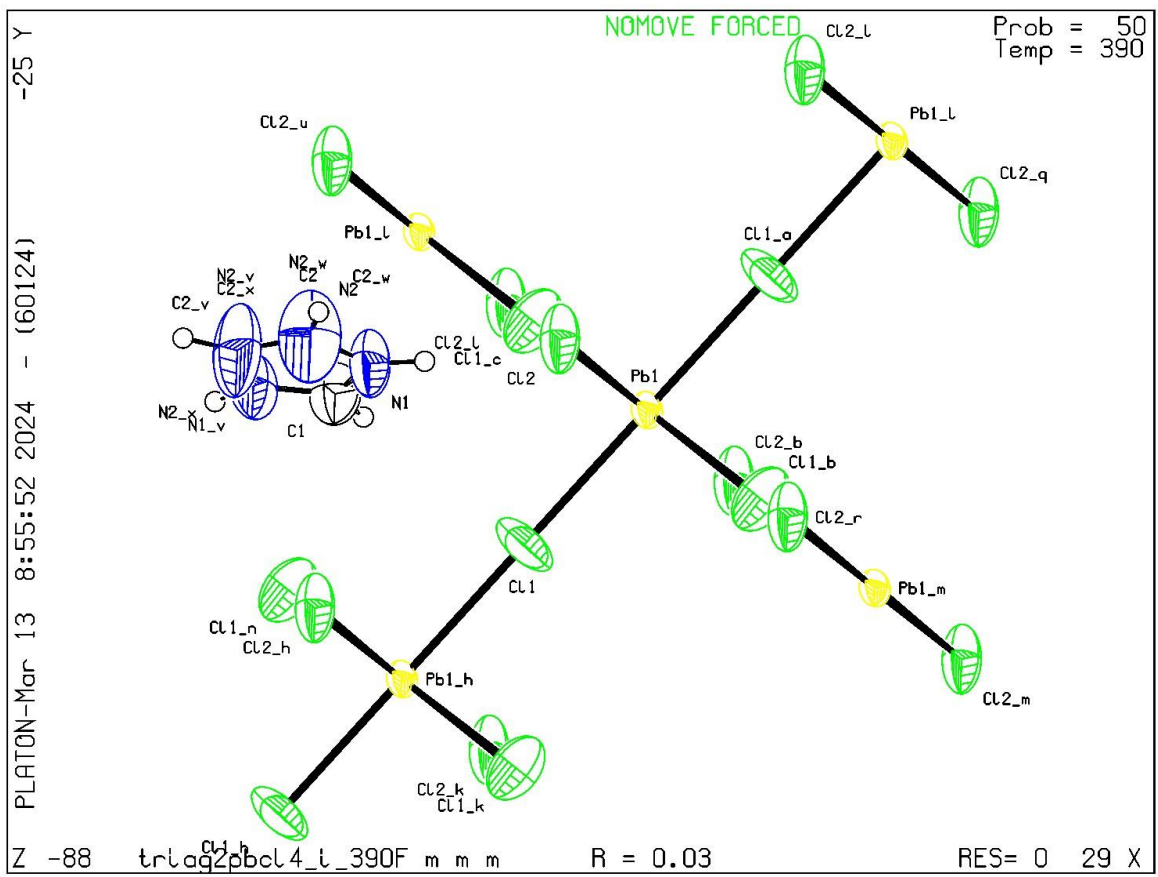



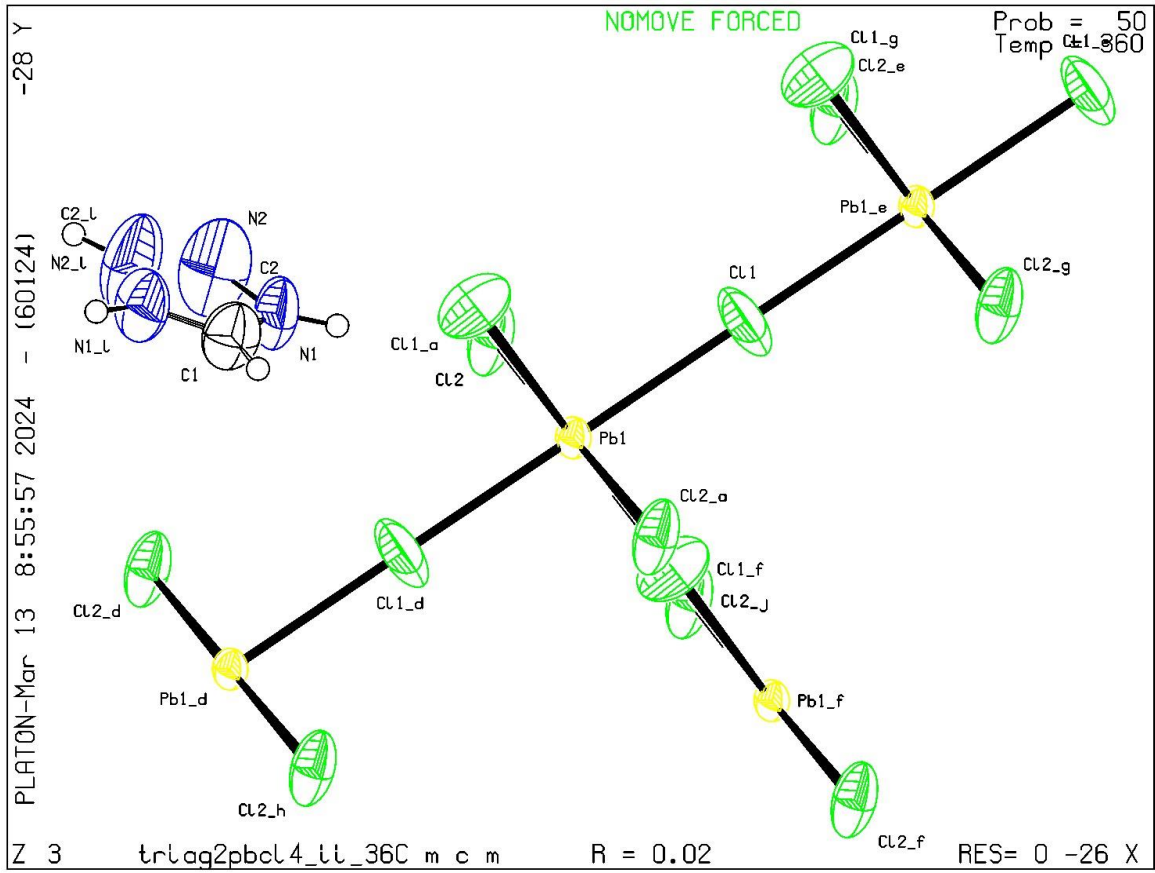

Datablock triag2pbcl4\_it\_340\_00

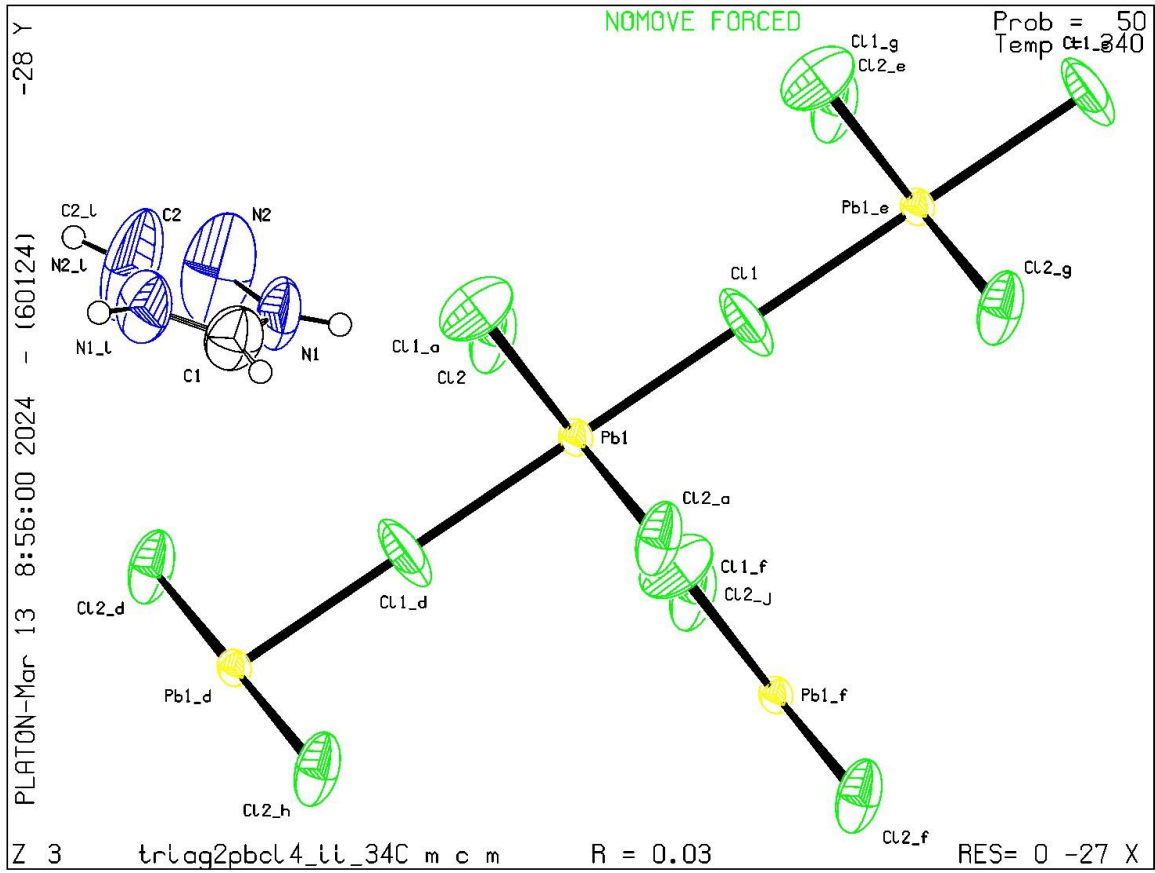

Datablock triag2pbcl4\_iii\_320\_00

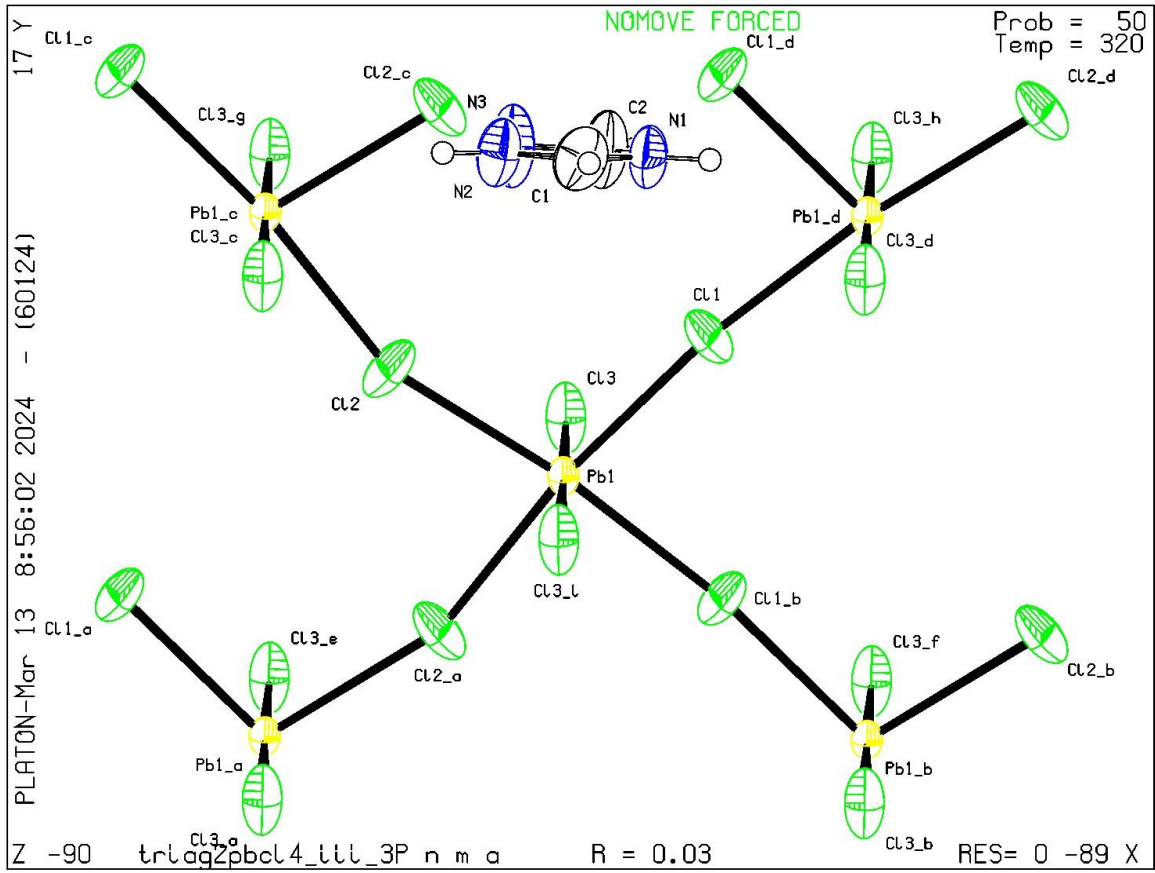

Datablock triag2pbcl4\_iii\_300\_00

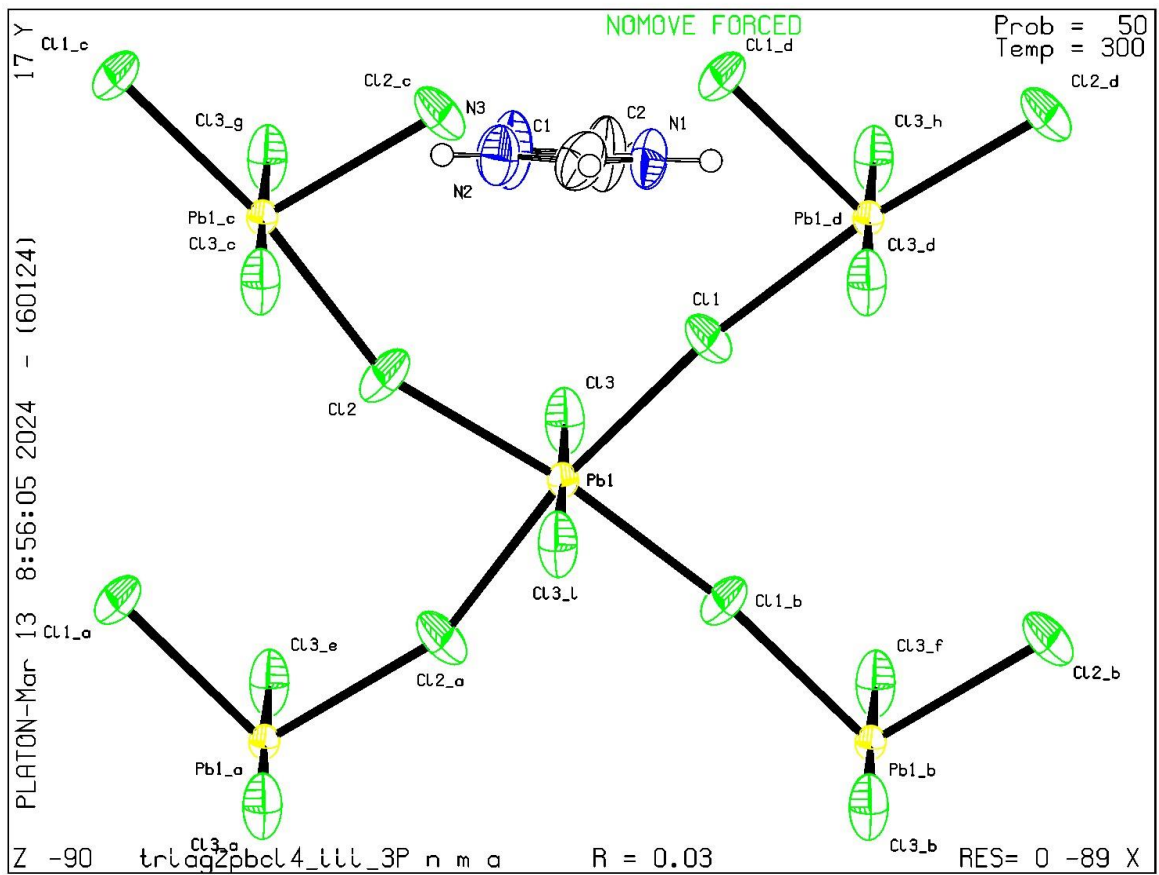

Datablock triag2pbcl4\_iii\_280\_00

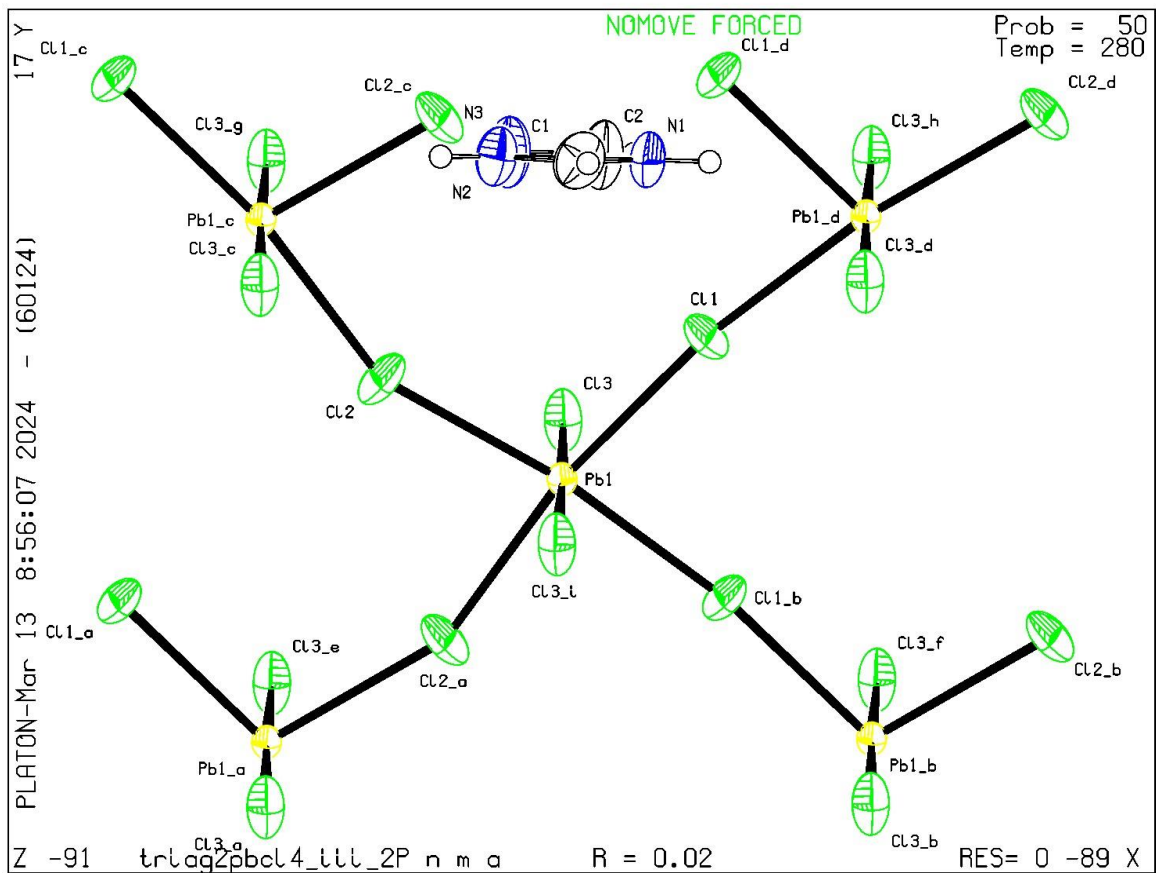

Datablock triag2pbcl4\_iv\_250\_00



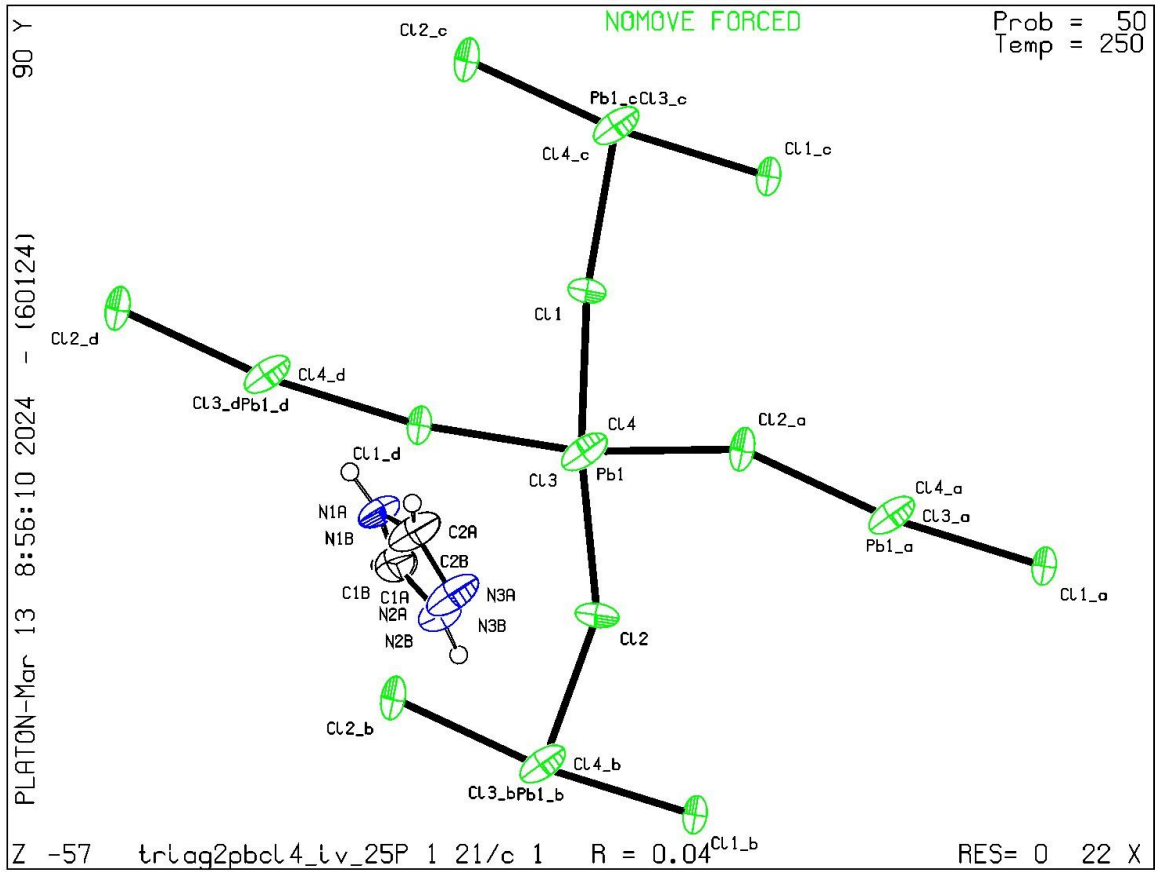

Datablock triag2pbcl4\_iv\_220\_00

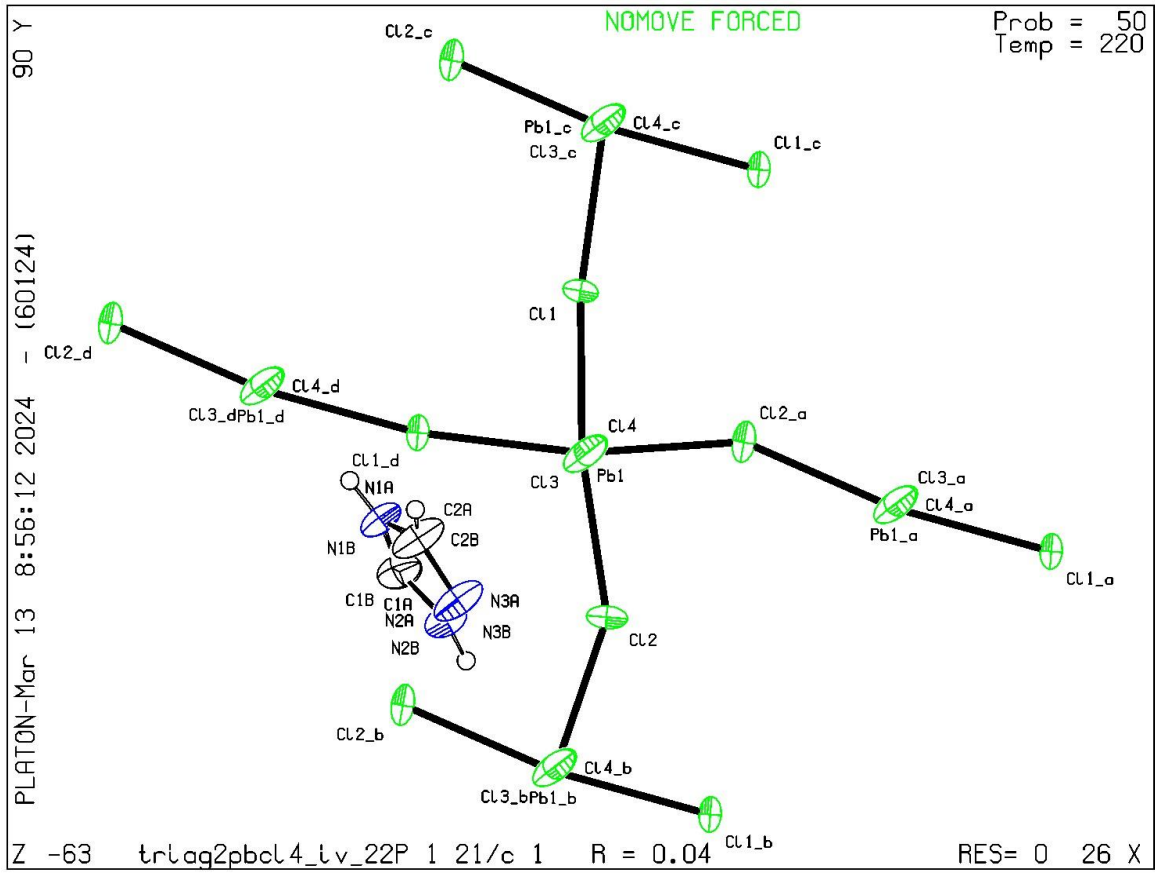

Datablock triag2pbcl4\_iv\_200\_00

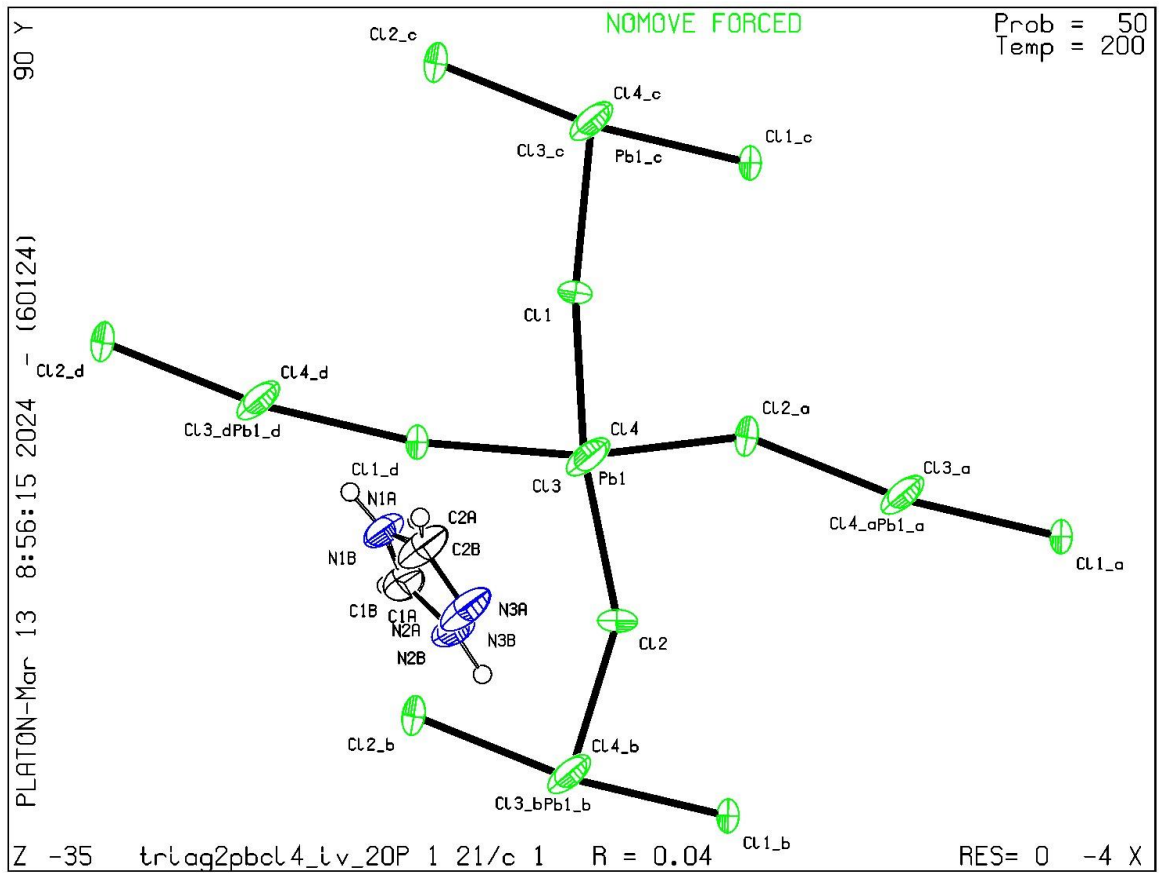

Datablock triag2pbcl4\_iv\_180\_00

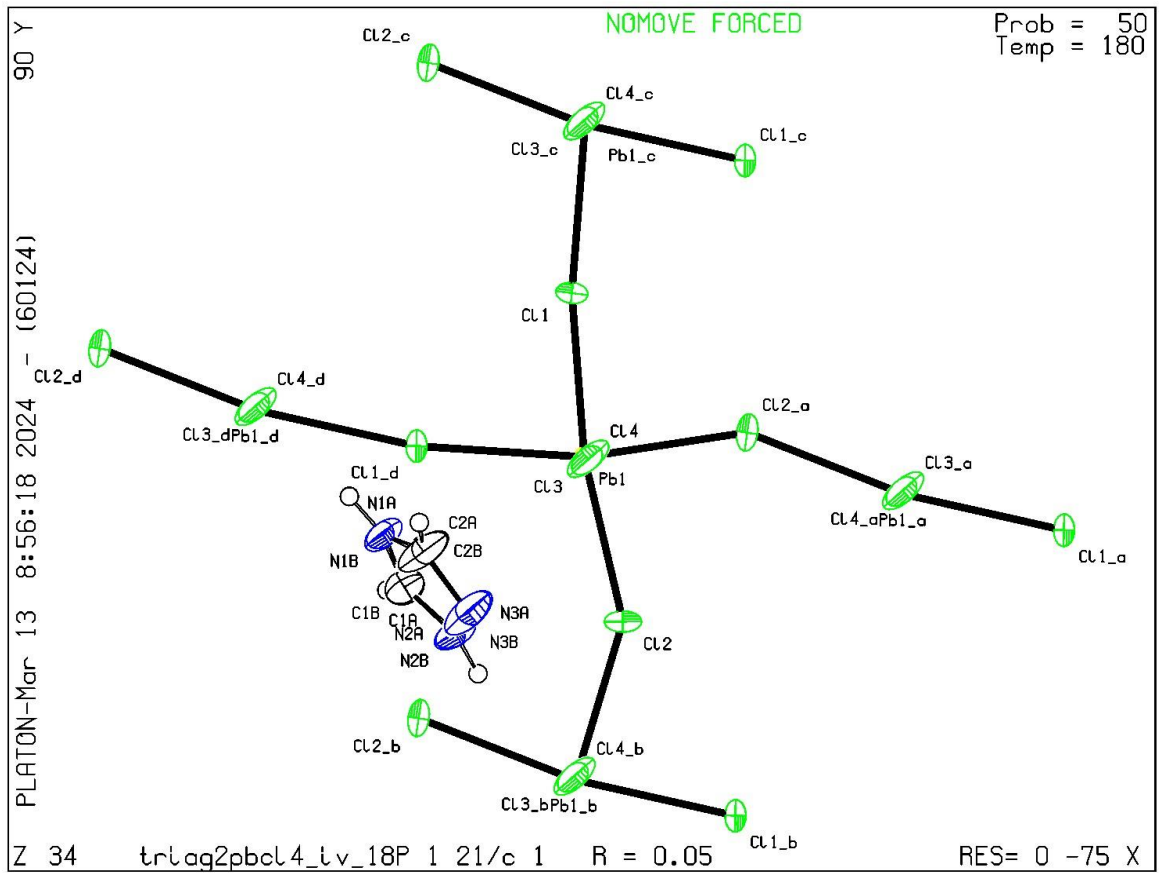

Datablock triag2pbcl4\_iv\_150\_00

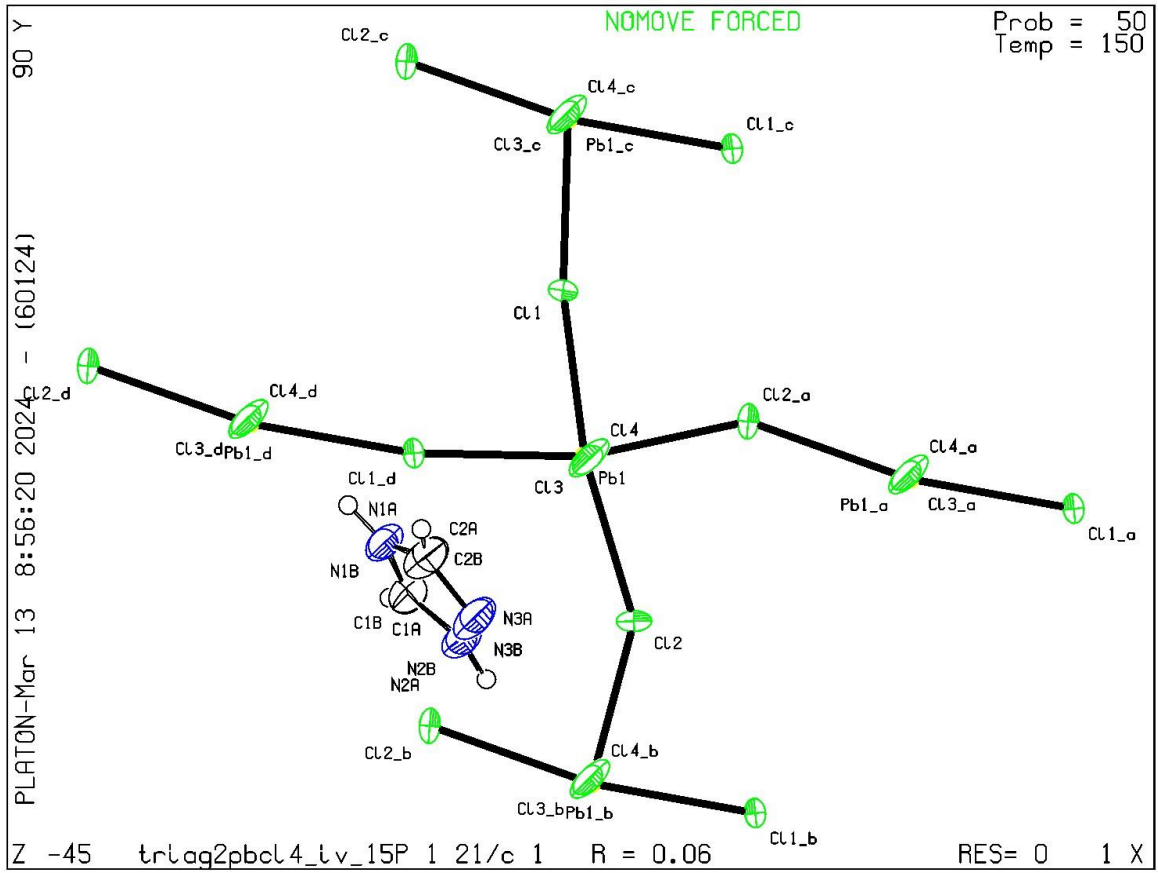

Datablock triag2pbcl4\_iv\_130\_00

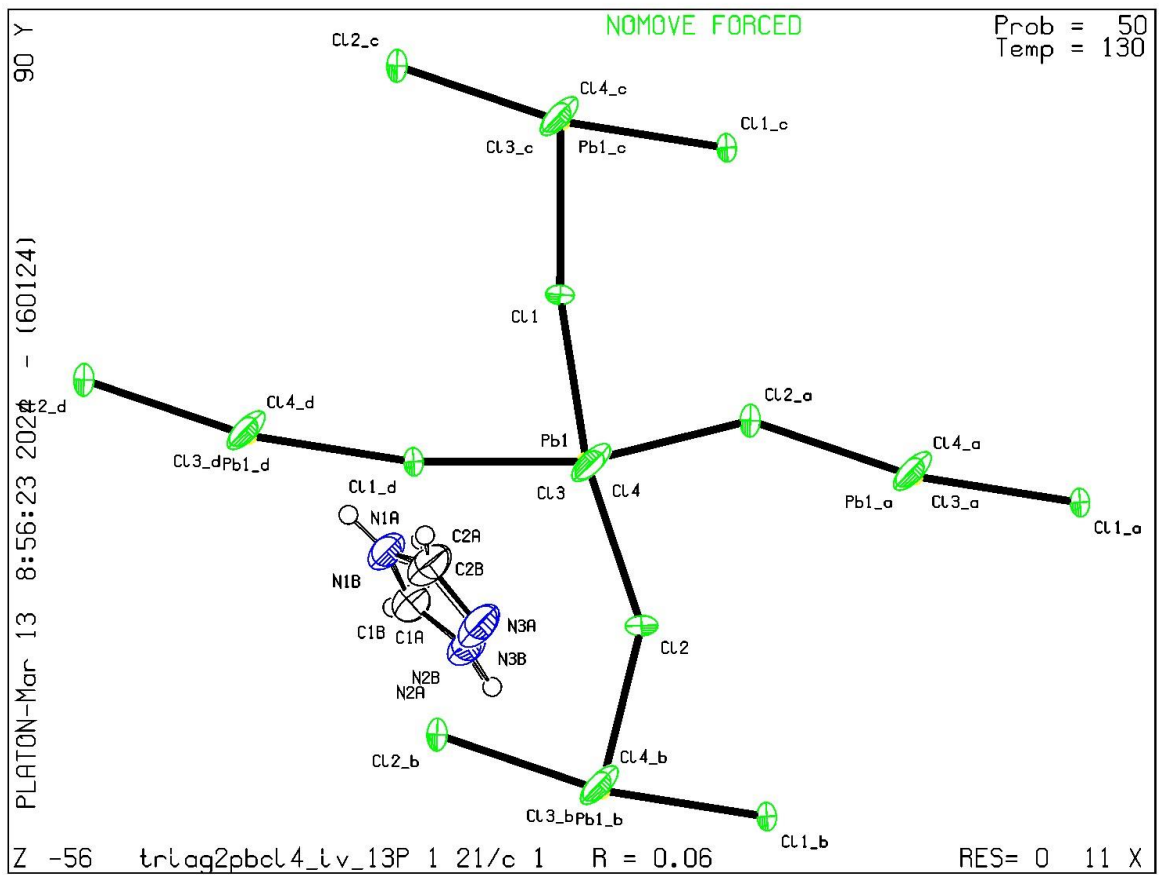

Datablock triag2pbcl4\_iv\_100\_00

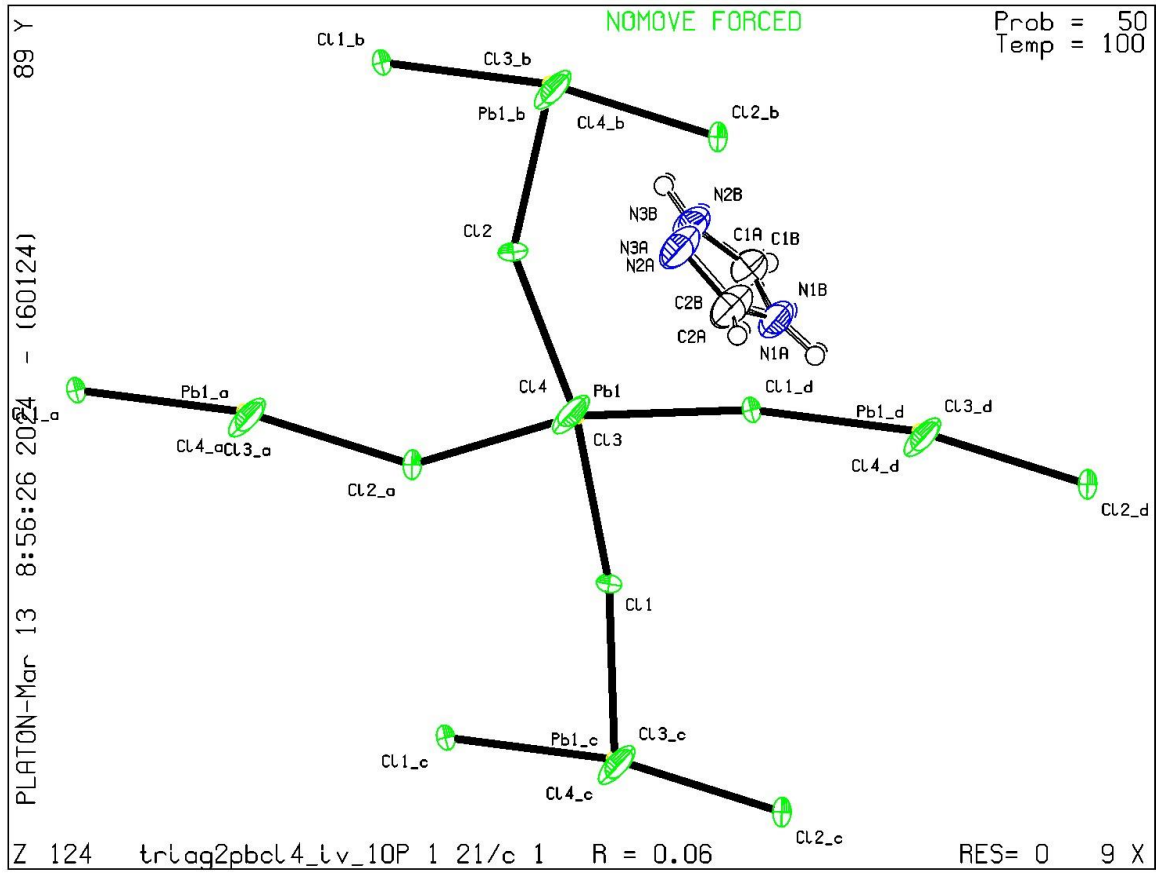

Supplement: d4dt00406j1.pdf [file d4dt00406j1.pdf]
